# Supplementary material for: Transcriptome Sequencing Reveals Regulatory Mechanisms of Taxol Synthesis in Taxus wallichiana var. Mairei
Source: Int J Genomics. 2019 May 2;2019:1596895. doi: 10.1155/2019/1596895 (PMC6525947; doi:10.1155/2019/1596895)
Supplement: Supplementary 1 — Table S1: primers used in qRT-PCR for the validation of differentially expressed genes. [file 1596895.f1.xlsx]

## Sheet: Sheet1
Table S1: Primers used in qRT-PCR for validation of differentially expressed genes
Gene ID	Name	Left_Primer	Right_Primer
Unigene0087496	taxadienol acetyltransferase (TAT)	CAGGGCGGCTCAGAAATACA	AGATGGAGGTCGCAGAAAGC
Unigene0015643	taxane 5-alpha-hydroxylase (T5H)	ACTGCAGAACTACGTTGCGA	AGAGGAAGCACCGTCACTTG
Unigene0084941	5-alpha-taxadienol-10-beta-hydroxylase (T10OH)	GAGCAACTCCATGGTCTGCT	GAATTTCGTCCAGCTTCGCC
Unigene0105070	2-debenzoyl-7,13-diacetylbaccatin III-2-O-benzoyl transferase (DBBT)	ACGTAGTGAATGTAGGCTGCA	TGGCATGTTCTTGGACTATCA
Unigene0075828	Protein TIFY 10B (TIFY10B)	AATCCGGTAGTGCCCAGTTG	TGGTTTTGTGGGTTGAGGCT
Unigene0000384	PREDICTED: transcription factor MYC2 isoform X1 (BHLH82)	TCTCCTCATGGCCCGAAGTA	TGGCAGGTTCTGGTTGTTGT
Unigene0080402	ethylene-responsive transcription factor ERF017	TCGGAAGTTCGAATGCCCAA	GCCGGTATGGATTTGGGGAA
Unigene0087698	GLP1 GID1-like protein (GID1C)	TGTGATTGCAGGGCTCGATT	CGACAGTAAAGCCGTGGTCT
Unigene0002231	GLP1 GID1-like protein (GID1A)	GGACGTCGGCGGAGATAAAT	ATGGTCTCTGTTAGCCCCCT
Unigene0061245	DELLA protein RGL2 (RGL2)	CGAAGTGTGGGGGTCATTCA	AAAACCACTCACAGCCACCA
Unigene0101434	Linoleate 9S-lipoxygenase (LOX1.1)	TTGCAGGGGACACACGATAC	TGGGATGAAGATGGCGAGTG
Unigene0054914	12-oxophytodienoate reductase 1(OPR1)	GGTGAGGTCATGGGAATGCA	TCAATACCATCGTAGCCGGC
Unigene0078503	PREDICTED: transcription factor bHLH36-like (BHLH36)	GTCATTGCCAGAGGACTTCGT	GACAACTCCACCTGCCGTTT
