# Supplementary material for: Transcriptome Sequencing Reveals Regulatory Mechanisms of Taxol Synthesis in Taxus wallichiana var. Mairei
Source: Int J Genomics. 2019 May 2;2019:1596895. doi: 10.1155/2019/1596895 (PMC6525947; doi:10.1155/2019/1596895)
Supplement: Supplementary 6 — Table S6: annotation to encode putative TFs. [file 1596895.f6.xls]

Tab. S6 annotation to encode putative TFs
GeneID	Tw_R_count	Tw_Y_count	Tw_R-1_rpkm	Tw_R-2_rpkm	Tw_R-3_rpkm	Tw_Y-1_rpkm	Tw_Y-2_rpkm	Tw_Y-3_rpkm	Tw_R_rpkm	Tw_Y_rpkm	log2 Ratio(Tw_Y/Tw_R)	Pvalue	FDR	significant	Symbol	Description	KEGG_A_class	KEGG_B_class	Pathway	K_ID	GO Component	GO Function	GO Process
Unigene0000076	798.3333333	630.3333333	8.1342	8.5298	8.433	5.6645	6.4893	5.6647	8.365666667	5.9395	-0.494139027	0.105985255	0.597181683	no	SCR	SCR [Pinus radiata]	-	-	-	-	-	-	-
Unigene0000172	56	46.66666667	2.8471	2.6286	1.4018	0.8872	3.4043	0.8217	2.2925	1.7044	-0.427657777	0.514856381	0.939311489	no	RL1	PREDICTED: protein RADIALIS-like 4 [Glycine max]	-	-	-	-	-	-	-
Unigene0000384	944	1955.333333	6.5163	7.9109	6.0099	13.7683	12.2433	12.3933	6.812366667	12.80163333	0.910099899	0.001645763	0.037794072	no	BHLH82	PREDICTED: transcription factor MYC2 isoform X1 [Vitis vinifera]	-	-	-	-	-	-	-
Unigene0000385	72.33333333	90	0.5532	1.06	0.5897	1.0481	0.5449	0.9311	0.7343	0.841366667	0.196365062	0.692541362	0.995496164	no	--	Transcriptional activator HAA1 [Anthurium amnicola]	-	-	-	-	-	-	-
Unigene0000413	10.33333333	48.66666667	0.4302	0.2482	0.1407	0.5945	1.6798	1.1752	0.273033333	1.149833333	2.074275761	0.003832829	0.071972937	no	ERF2	PREDICTED: ethylene-responsive transcription factor 5-like isoform X2 [Lupinus angustifolius]	-	-	-	-	-	-	-
Unigene0000565	742	887.6666667	5.8554	8.5198	5.7968	8.7233	6.867	6.4051	6.724	7.3318	0.124847707	0.706994586	0.996712695	no	SCRM	PREDICTED: transcription factor ICE1-like [Nelumbo nucifera]	-	-	-	-	-	-	-
Unigene0000593	57.33333333	99	1.3337	1.0708	0.8696	2.0657	1.3401	1.7243	1.091366667	1.710033333	0.647888562	0.152313545	0.692239636	no	GT-3B	PREDICTED: trihelix transcription factor GT-3b-like [Nelumbo nucifera]	-	-	-	-	-	-	GO:0044237//cellular metabolic process;GO:0018130//heterocycle biosynthetic process;GO:0006807//nitrogen compound metabolic process;GO:0043170//macromolecule metabolic process;GO:0034645//cellular macromolecule biosynthetic process;GO:0097659//nucleic acid-templated transcription;GO:0090304//nucleic acid metabolic process;GO:0006139//nucleobase-containing compound metabolic process;GO:0071704//or…
Unigene0000613	434	489.6666667	5.4509	4.8169	5.6003	4.2963	4.9708	6.7834	5.289366667	5.350166667	0.016488846	0.963914538	1	no	ABF2	PREDICTED: bZIP transcription factor TRAB1 isoform X2 [Amborella trichopoda]	Environmental Information Processing	Signal transduction	ko04075//Plant hormone signal transduction	K14432	-	-	GO:0042221//response to chemical;GO:0009628//response to abiotic stimulus;GO:0050789//regulation of biological process;GO:0065007//biological regulation;GO:0050896//response to stimulus;GO:0050794//regulation of cellular process;GO:0006950//response to stress
Unigene0000660	10821	12712	103.8072	139.0779	111.8501	115.5607	139.4531	121.4265	118.2450667	125.4801	0.08567859	0.720608134	1	no	DIVARICATA	Myb_DNA-binding domain-containing protein [Cephalotus follicularis]	-	-	-	-	-	GO:0097159//organic cyclic compound binding;GO:0005488//binding;GO:0043169//cation binding;GO:0043167//ion binding;GO:1901363//heterocyclic compound binding;GO:0046872//metal ion binding;GO:0046914//transition metal ion binding;GO:0003676//nucleic acid binding	-
Unigene0000774	35	47.33333333	0.3013	0.8346	0.3153	0.3569	0.5281	0.9216	0.483733333	0.6022	0.316030753	0.632834294	0.980658878	no	CDF4	Dof8 [Pinus pinaster]	-	-	-	-	-	-	-
Unigene0000869	90	119.3333333	0.633	1.4224	1.0996	1.1003	1.3493	1.3424	1.051666667	1.264	0.265318959	0.555438648	0.956037288	no	FAMA	PREDICTED: transcription factor bHLH94 [Amborella trichopoda]	-	-	-	-	-	-	-
Unigene0000886	2808.666667	3095.333333	37.3661	59.9873	39.0091	47.9656	41.554	47.508	45.45416667	45.67586667	0.007019555	0.980834031	1	no	--	PREDICTED: probable transcription factor At1g61730 [Ipomoea nil]	-	-	-	-	-	-	-
Unigene0000939	18.66666667	38.33333333	0.5277	0.348	0.1578	0.9377	0.5001	0.5044	0.3445	0.6474	0.910153383	0.182571766	0.734361469	no	HSFB4	PREDICTED: heat stress transcription factor B-4 [Jatropha curcas]	-	-	-	-	-	-	-
Unigene0000941	11.66666667	16.33333333	0.4783	0.5005	0.1001	0.3525	0.655	0.3698	0.359633333	0.4591	0.352281686	0.708551319	0.997053203	no	GATA16	PREDICTED: GATA zinc finger domain-containing protein 8 [Amborella trichopoda]	-	-	-	-	-	-	-
Unigene0001002	423.6666667	502	7.5853	4.8889	5.9218	5.6981	6.5046	7.3	6.132	6.5009	0.084281765	0.808340727	1	no	HOXA3	homeobox-DDT domain protein RLT2-like isoform X1 [Aegilops tauschii subsp. tauschii] [Aegilops tauschii]	-	-	-	-	-	-	-
Unigene0001022	1540.666667	1281	21.6829	26.6832	19.9434	16.0614	17.8359	17.5143	22.76983333	17.1372	-0.409992321	0.155119015	0.694214679	no	TRB1	PREDICTED: telomere repeat-binding factor 1 isoform X2 [Amborella trichopoda]	-	-	-	-	-	GO:0097159//organic cyclic compound binding;GO:0003677//DNA binding;GO:1901363//heterocyclic compound binding;GO:0046983//protein dimerization activity;GO:0003676//nucleic acid binding;GO:0005488//binding;GO:0005515//protein binding;GO:0003690//double-stranded DNA binding	GO:0006970//response to osmotic stress;GO:0050896//response to stimulus;GO:0009725//response to hormone;GO:0009628//response to abiotic stimulus;GO:0001101//response to acid chemical;GO:0006950//response to stress;GO:0010033//response to organic substance;GO:0010038//response to metal ion;GO:0009719//response to endogenous stimulus;GO:0009987//cellular process;GO:0010035//response to inorganic su…
Unigene0001084	213	269	3.0702	1.8661	3.2257	3.0878	2.781	3.3208	2.720666667	3.0632	0.171079355	0.650740257	0.985645372	no	Os06g0194400	B3 domain transcription factor [Medicago truncatula]	-	-	-	-	-	-	-
Unigene0001202	589.6666667	469	7.9547	5.3744	7.049	4.8928	4.9027	4.7065	6.7927	4.834	-0.490767666	0.137466275	0.666567421	no	Os05g0195200	Zinc finger CCCH domain-containing protein 2, partial [Anthurium amnicola]	-	-	-	-	-	-	-
Unigene0001214	539.3333333	1121.333333	4.3779	3.1787	3.8097	8.308	7.118	5.7948	3.788766667	7.0736	0.900716346	0.005552748	0.095009953	no	--	PREDICTED: stress response protein nst1 isoform X1 [Vitis vinifera]	-	-	-	-	-	-	-
Unigene0001251	28.66666667	12.66666667	0.5287	1.2473	0.676	0.5412	0.0754	0.393	0.817333333	0.336533333	-1.280175164	0.11844846	0.628118943	no	ERF4	PREDICTED: ethylene-responsive transcription factor 4-like [Daucus carota subsp. sativus] [Daucus carota]	-	-	-	-	-	-	-
Unigene0001265	149.3333333	164.6666667	1.4045	1.0631	1.4147	1.1814	1.2543	1.3929	1.2941	1.2762	-0.020094665	0.960178301	1	no	--	C2H2-like zinc finger protein [Theobroma cacao]	-	-	-	-	-	-	-
Unigene0001281	462.6666667	362	10.2439	10.7585	8.0833	6.4883	7.5438	6.53	9.695233333	6.854033333	-0.500322412	0.134550128	0.660114494	no	MYB4	R2R3-MYB transcription factor MYB5 [Picea glauca]	-	-	-	-	-	-	-
Unigene0001313	29.33333333	68.33333333	0.2532	0.4175	0.9273	1.383	0.6811	1.2585	0.532666667	1.107533333	1.056045213	0.082563966	0.530427727	no	MYB5	transcription factor MYB35 [Picea abies]	-	-	-	-	-	-	-
Unigene0001428	102.3333333	94	0.9893	1.5259	0.9742	0.9114	0.8268	1.1836	1.163133333	0.973933333	-0.25612156	0.556467051	0.956453935	no	TCP2	PREDICTED: transcription factor PCF6-like [Musa acuminata subsp. malaccensis] [Musa acuminata]	-	-	-	-	-	-	GO:0034654//nucleobase-containing compound biosynthetic process;GO:1901360//organic cyclic compound metabolic process;GO:0032502//developmental process;GO:0032501//multicellular organismal process;GO:0050789//regulation of biological process;GO:0009887//organ morphogenesis;GO:0006351//transcription, DNA-templated;GO:0043170//macromolecule metabolic process;GO:0048367//shoot system development;GO:…
Unigene0001439	1053	995	13.7197	12.7938	12.3712	11.077	11.6998	10.2916	12.96156667	11.0228	-0.233749365	0.424284022	0.900332113	no	--	gt-2-related family protein [Populus trichocarpa]	-	-	-	-	-	-	-
Unigene0001477	61.66666667	50.33333333	0.4599	0.8589	0.5687	0.7222	0.3847	0.3077	0.629166667	0.471533333	-0.416082478	0.436578194	0.906166154	no	GRF6	growth regulating factor 3 [Larix kaempferi]	-	-	-	-	-	-	-
Unigene0001510	1164.333333	1161	16.7062	26.4909	17.1096	17.9808	19.443	17.2526	20.10223333	18.22546667	-0.141400036	0.655346603	0.987538164	no	NFYB3	NF-YB3 [Picea wilsonii]	-	-	-	-	GO:0044464//cell part;GO:0043226//organelle;GO:0005623//cell;GO:0043227//membrane-bounded organelle;GO:0043229//intracellular organelle;GO:0044424//intracellular part;GO:0043231//intracellular membrane-bounded organelle;GO:0005622//intracellular	GO:0046983//protein dimerization activity;GO:0003677//DNA binding;GO:0003676//nucleic acid binding;GO:0005515//protein binding;GO:1901363//heterocyclic compound binding;GO:0005488//binding;GO:0097159//organic cyclic compound binding	GO:0034654//nucleobase-containing compound biosynthetic process;GO:0046483//heterocycle metabolic process;GO:0044237//cellular metabolic process;GO:0034645//cellular macromolecule biosynthetic process;GO:0006807//nitrogen compound metabolic process;GO:0032774//RNA biosynthetic process;GO:0006139//nucleobase-containing compound metabolic process;GO:0006351//transcription, DNA-templated;GO:0043170/…
Unigene0001572	202	324.3333333	1.2502	1.056	0.8683	1.6664	1.1064	1.8508	1.058166667	1.5412	0.542487214	0.153197376	0.693628128	no	TCX2	PREDICTED: protein tesmin/TSO1-like CXC 4 [Nelumbo nucifera]	-	-	-	-	-	-	-
Unigene0001595	69.33333333	63	0.4592	1.2365	0.8942	1.0224	0.7533	0.3755	0.8633	0.717066667	-0.267754734	0.635311531	0.981273255	no	LOB	PREDICTED: LOB domain-containing protein 6 [Vitis vinifera]	-	-	-	-	-	-	-
Unigene0001609	4776.333333	5636.666667	31.7952	25.8338	34.226	34.7215	32.7374	29.624	30.61833333	32.36096667	0.07985895	0.745910876	1	no	DIVARICATA	PREDICTED: transcription factor DIVARICATA [Prunus mume]	-	-	-	-	-	-	-
Unigene0001635	13.33333333	26	0.3713	0.4571	0.3885	0.4846	0.9269	0.7177	0.405633333	0.709733333	0.807100853	0.255010493	0.811849343	no	KAN4	PREDICTED: myb family transcription factor APL [Vitis vinifera]	-	-	-	-	-	GO:0005488//binding	-
Unigene0001686	15.66666667	26.66666667	0.5788	0.5598	0.1154	0.6348	0.5661	0.7622	0.418	0.654366667	0.646596317	0.407783007	0.889964611	no	ERF016	AP2/ERF domain-containing protein [Cynara cardunculus var. scolymus] [Cynara cardunculus]	-	-	-	-	-	-	-
Unigene0001771	202	104	3.7178	4.9522	2.7756	2.0337	2.0882	1.2437	3.8152	1.788533333	-1.092981681	0.009263353	0.138884417	no	Hic2	PREDICTED: zinc finger protein 567-like [Nelumbo nucifera]	-	-	-	-	-	GO:0043169//cation binding;GO:0005488//binding;GO:0043167//ion binding	-
Unigene0001884	224.6666667	218.6666667	2.6043	1.6654	3.3382	2.0877	2.1228	2.3634	2.535966667	2.1913	-0.210748772	0.594463188	0.970032009	no	GT-3B	PREDICTED: trihelix transcription factor GT-3b isoform X2 [Amborella trichopoda]	-	-	-	-	-	-	-
Unigene0002006	16.33333333	34	0.1605	0.5682	0.5599	1.3803	0.1603	0.9308	0.429533333	0.8238	0.939524032	0.255580644	0.811849343	no	BHLH93	PREDICTED: transcription factor bHLH61-like [Gossypium hirsutum]	-	-	-	-	-	-	-
Unigene0002017	21.66666667	8.333333333	0.793	1.011	0.5926	0.1392	0.4201	0.2695	0.798866667	0.276266667	-1.531893231	0.054380421	0.431034107	no	DREB1C	C-repeat binding factor [Ageratina adenophora]	-	-	-	-	-	-	GO:0032774//RNA biosynthetic process;GO:0071704//organic substance metabolic process;GO:0006725//cellular aromatic compound metabolic process;GO:0018130//heterocycle biosynthetic process;GO:0050896//response to stimulus;GO:0009987//cellular process;GO:0009059//macromolecule biosynthetic process;GO:0006807//nitrogen compound metabolic process;GO:0034645//cellular macromolecule biosynthetic process…
Unigene0002053	14.33333333	6.666666667	0.2305	0.6383	1.1092	0.4246	0	0.4112	0.659333333	0.2786	-1.242812762	0.273128294	0.821083677	no	MYB305	PREDICTED: myb-related protein 305 [Citrus sinensis]	-	-	-	-	-	-	-
Unigene0002099	16	44	0.2108	0.3308	0.4631	0.4077	0.974	1.0716	0.3349	0.817766667	1.287958882	0.052520383	0.422849853	no	NSP2	PREDICTED: nodulation-signaling pathway 2 protein [Amborella trichopoda]	-	-	-	-	-	-	-
Unigene0002109	13.66666667	19	0.0614	0.5383	0.6421	0.3392	0.9192	0.2737	0.413933333	0.5107	0.303077628	0.7662362	1	no	Os01g0905400	PREDICTED: B3 domain-containing protein Os01g0723500 [Amborella trichopoda]	-	-	-	-	-	-	-
Unigene0002204	2	28.66666667	0	0.0629	0.1426	1.5379	0.4082	0.699	0.0685	0.8817	3.686111967	0.000808362	0.021192792	yes	BHLH36(BHLH)	PREDICTED: transcription factor bHLH118-like [Populus euphratica]	-	-	-	-	-	-	-
Unigene0002281	5.666666667	24.33333333	0.2725	0.4613	0	1.5065	1.0497	0.4052	0.2446	0.987133333	2.012820561	0.050932843	0.416161288	no	ERF016	ethylene-responsive transcription factor ERF-IIb3 [Gossypium hirsutum]	-	-	-	-	GO:0043229//intracellular organelle;GO:0043227//membrane-bounded organelle;GO:0044424//intracellular part;GO:0005623//cell;GO:0005622//intracellular;GO:0043231//intracellular membrane-bounded organelle;GO:0044464//cell part;GO:0043226//organelle	GO:0001071//nucleic acid binding transcription factor activity	GO:0043170//macromolecule metabolic process;GO:1901360//organic cyclic compound metabolic process;GO:0019438//aromatic compound biosynthetic process;GO:0006139//nucleobase-containing compound metabolic process;GO:1901576//organic substance biosynthetic process;GO:0016070//RNA metabolic process;GO:0009058//biosynthetic process;GO:0090304//nucleic acid metabolic process;GO:0044249//cellular biosynt…
Unigene0002323	85.66666667	94.66666667	1.1345	1.458	1.2833	1.1441	0.7873	1.9557	1.291933333	1.2957	0.004200097	1	1	no	--	PREDICTED: ras-responsive element-binding protein 1 [Nicotiana attenuata]	-	-	-	-	-	-	-
Unigene0002523	12.33333333	10	0.3974	0.8073	0.2079	0.476	0.1021	0.4964	0.470866667	0.358166667	-0.394687519	0.71581669	0.999151658	no	BHLH94	basic helix-loop-helix transcription factor [Salvia miltiorrhiza]	-	-	-	-	-	-	-
Unigene0002648	14.33333333	22.33333333	0.1363	0.975	0.2852	1.4123	0.1749	0.4862	0.4655	0.691133333	0.570182894	0.571126161	0.960762873	no	MYB44	Myb_DNA-bind_6 domain-containing protein [Cephalotus follicularis]	-	-	-	-	-	-	-
Unigene0002664	13.33333333	7	0.1826	0.8709	0.0955	0.028	0.3646	0.1629	0.383	0.185166667	-1.048519981	0.378109185	0.871562364	no	NSP2	nodulation-signaling pathway 2 protein-like [Cajanus cajan]	-	-	-	-	-	-	-
Unigene0002949	1410.333333	1023	13.051	12.1465	14.7516	9.8822	4.6964	11.6167	13.31636667	8.731766667	-0.608855017	0.095567364	0.567384194	no	HY5	PREDICTED: transcription factor HY5 [Brassica oleracea var. oleracea] [Brassica oleracea]	Organismal Systems	Environmental adaptation	ko04712//Circadian rhythm - plant	K16241	-	-	-
Unigene0003093	8	3.333333333	0.092	0.2548	0	0.0282	0.0656	0.041	0.1156	0.044933333	-1.363283402	0.358255322	0.860074792	no	LBD6	PREDICTED: LOB domain-containing protein 6 [Vitis vinifera]	-	-	-	-	-	-	-
Unigene0003135	6	5.333333333	0.9573	0.3683	0.0835	0.735	0.4097	0	0.4697	0.381566667	-0.299804449	0.857727683	1	no	ERF017	Ethylene-responsive transcription factor ERF017 family [Cajanus cajan]	-	-	-	-	GO:0005623//cell;GO:0043229//intracellular organelle;GO:0044424//intracellular part;GO:0043231//intracellular membrane-bounded organelle;GO:0044464//cell part;GO:0005622//intracellular;GO:0043227//membrane-bounded organelle;GO:0043226//organelle	GO:0001071//nucleic acid binding transcription factor activity	GO:0044260//cellular macromolecule metabolic process;GO:0009987//cellular process;GO:0034645//cellular macromolecule biosynthetic process;GO:0016070//RNA metabolic process;GO:0006725//cellular aromatic compound metabolic process;GO:0090304//nucleic acid metabolic process;GO:0034654//nucleobase-containing compound biosynthetic process;GO:0046483//heterocycle metabolic process;GO:0009059//macromole…
Unigene0003268	1967	3093.666667	23.9526	39.902	29.1737	46.9093	42.8624	43.2656	31.00943333	44.34576667	0.516089226	0.070762258	0.492596257	no	SCRM2	FIT1 [Marchantia polymorpha]	-	-	-	-	-	-	-
Unigene0003601	129.6666667	152	2.1416	1.3182	1.4538	2.114	1.342	1.7399	1.637866667	1.731966667	0.080593248	0.846288609	1	no	SCR	SCR [Pinus radiata]	-	-	-	-	-	-	GO:0006139//nucleobase-containing compound metabolic process;GO:0044271//cellular nitrogen compound biosynthetic process;GO:0032774//RNA biosynthetic process;GO:0034641//cellular nitrogen compound metabolic process;GO:0008152//metabolic process;GO:0044238//primary metabolic process;GO:0044237//cellular metabolic process;GO:0034654//nucleobase-containing compound biosynthetic process;GO:0046483//h…
Unigene0003602	33	55.33333333	0.9846	1.2784	0.7083	1.7859	1.0271	1.7567	0.990433333	1.523233333	0.62100518	0.255230719	0.811849343	no	SCR	SCR [Pinus radiata]	-	-	-	-	GO:0044464//cell part;GO:0044424//intracellular part;GO:0043231//intracellular membrane-bounded organelle;GO:0005623//cell;GO:0043229//intracellular organelle;GO:0005622//intracellular;GO:0043226//organelle;GO:0043227//membrane-bounded organelle	GO:0005488//binding;GO:0097159//organic cyclic compound binding;GO:0005515//protein binding;GO:0003676//nucleic acid binding;GO:0046983//protein dimerization activity;GO:1901363//heterocyclic compound binding;GO:0003677//DNA binding	GO:0007275//multicellular organism development;GO:0044763//single-organism cellular process;GO:0070727//cellular macromolecule localization;GO:0034504//protein localization to nucleus;GO:0009606//tropism;GO:0044767//single-organism developmental process;GO:0007389//pattern specification process;GO:0032502//developmental process;GO:0051179//localization;GO:0033365//protein localization to organell…
Unigene0003603	178.3333333	282	1.5011	1.1629	1.9407	2.7659	1.5802	2.1857	1.5349	2.177266667	0.50437345	0.203843297	0.763576886	no	SCR	SCL4, partial [Pinus radiata]	-	-	-	-	-	-	-
Unigene0003931	712.6666667	795.6666667	4.2638	3.6064	3.9525	3.6862	3.5393	4.641	3.9409	3.9555	0.00533493	0.988007341	1	no	NAC078	PREDICTED: NAC domain-containing protein 37-like isoform X2 [Nelumbo nucifera]	-	-	-	-	-	-	-
Unigene0003965	488.3333333	425.6666667	4.1757	3.4744	4.598	3.8237	2.6156	3.1617	4.0827	3.200333333	-0.351301383	0.303893323	0.838508349	no	RKD5	PREDICTED: protein RKD5 [Amborella trichopoda]	-	-	-	-	-	-	-
Unigene0004265	407.3333333	441.3333333	13.7657	24.0069	19.504	19.2874	18.9818	17.9932	19.0922	18.75413333	-0.02577476	0.943753774	1	no	MADS56	truncated MADS-box transcription factor, partial [Pseudotsuga menziesii]	-	-	-	-	-	-	-
Unigene0004370	8	3.333333333	0.5375	0	0.6646	0	0	0.4359	0.4007	0.1453	-1.463487807	0.489678269	0.930972317	no	MYB4	MYB transcription factor MYB67, partial [Glycine max]	-	-	-	-	-	GO:0005488//binding	-
Unigene0004403	1605.333333	2286.333333	8.7896	8.7779	7.8458	12.1983	10.1863	10.3444	8.4711	10.90966667	0.364985797	0.17844397	0.728873187	no	CLF	PREDICTED: histone-lysine N-methyltransferase CLF-like isoform X1 [Nelumbo nucifera]	-	-	-	-	-	-	-
Unigene0004828	1408	1752.666667	6.6656	6.2023	5.2011	7.0136	6.8318	6.4693	6.023	6.771566667	0.169007395	0.546976076	0.953458789	no	DOF5.3	Dof2 [Pinus pinaster]	-	-	-	-	-	-	-
Unigene0004894	285.6666667	518.6666667	5.7632	3.9989	5.2901	10.0165	6.4911	8.0743	5.0174	8.193966667	0.707622066	0.047926224	0.40246878	no	LBD40	PREDICTED: LOB domain-containing protein 41 [Vitis vinifera]	-	-	-	-	-	-	-
Unigene0004895	72	77.33333333	1.4205	2.3524	0.9437	1.558	2.2579	0.8046	1.5722	1.540166667	-0.029698277	0.971145276	1	no	ERF018	PREDICTED: ethylene-responsive transcription factor ERF017-like [Nelumbo nucifera]	-	-	-	-	-	-	GO:1901576//organic substance biosynthetic process;GO:0034645//cellular macromolecule biosynthetic process;GO:0009987//cellular process;GO:0034654//nucleobase-containing compound biosynthetic process;GO:0006139//nucleobase-containing compound metabolic process;GO:1901362//organic cyclic compound biosynthetic process;GO:0044260//cellular macromolecule metabolic process;GO:0032774//RNA biosynthetic…
Unigene0004911	110	133.3333333	0.8885	0.6626	2.2526	1.018	1.4429	1.575	1.2679	1.3453	0.085486964	0.871691736	1	no	KAN1	PREDICTED: probable transcription factor RL9 [Oryza brachyantha]	-	-	-	-	-	-	-
Unigene0004972	284	344	3.7346	5.165	4.1691	4.2324	5.256	4.8091	4.356233333	4.765833333	0.129647268	0.711011535	0.997579661	no	WHY1	PREDICTED: single-stranded DNA-binding protein WHY1, chloroplastic [Brassica oleracea var. oleracea] [Brassica oleracea]	-	-	-	-	GO:0043229//intracellular organelle;GO:0000229//cytoplasmic chromosome;GO:0044444//cytoplasmic part;GO:0044424//intracellular part;GO:0005622//intracellular;GO:0005737//cytoplasm;GO:0043226//organelle;GO:0005694//chromosome;GO:0043227//membrane-bounded organelle;GO:0044464//cell part;GO:0043231//intracellular membrane-bounded organelle;GO:0043228//non-membrane-bounded organelle;GO:0043232//intrac…	GO:0043566//structure-specific DNA binding;GO:0097159//organic cyclic compound binding;GO:0005488//binding;GO:1901363//heterocyclic compound binding;GO:0003677//DNA binding;GO:0043565//sequence-specific DNA binding;GO:0003676//nucleic acid binding	GO:0065008//regulation of biological quality;GO:0034645//cellular macromolecule biosynthetic process;GO:0044711//single-organism biosynthetic process;GO:0044260//cellular macromolecule metabolic process;GO:0009058//biosynthetic process;GO:1901360//organic cyclic compound metabolic process;GO:0044710//single-organism metabolic process;GO:0016043//cellular component organization;GO:0042592//homeost…
Unigene0005238	3.333333333	6.333333333	0.5723	0.0587	0	0	0.3266	0.7375	0.210333333	0.3547	0.753921826	0.72977692	1	no	--	--	-	-	-	-	-	-	-
Unigene0005399	9114.666667	8168	38.0017	43.1945	44.2993	37.7601	32.1152	31.5895	41.83183333	33.8216	-0.306656316	0.191816358	0.745468587	no	NFYC2	PREDICTED: nuclear transcription factor Y subunit C-9-like [Nelumbo nucifera]	-	-	-	-	GO:0005622//intracellular;GO:0044464//cell part;GO:0043229//intracellular organelle;GO:0044424//intracellular part;GO:0043226//organelle;GO:0005634//nucleus;GO:0005737//cytoplasm;GO:0043227//membrane-bounded organelle;GO:0043231//intracellular membrane-bounded organelle;GO:0005623//cell	GO:0005488//binding	-
Unigene0005593	1344.333333	1202	9.8819	8.5851	8.8889	6.9924	8.4577	6.4889	9.118633333	7.313	-0.318354253	0.274295406	0.821644445	no	CIGR2	SCL10 [Pinus radiata]	-	-	-	-	-	-	GO:0009987//cellular process
Unigene0005664	1666.666667	2105.333333	12.3187	6.2135	13.5998	10.6463	14.4985	10.6916	10.71066667	11.94546667	0.157414935	0.645855752	0.985633517	no	GT-2	PREDICTED: trihelix transcription factor GTL1 [Amborella trichopoda]	-	-	-	-	-	-	-
Unigene0005754	550.6666667	692.6666667	4.0683	4.9391	4.5265	6.6454	4.3294	4.4752	4.5113	5.15	0.191029204	0.572097333	0.960844186	no	GRF5	growth regulating factor 1 [Larix kaempferi]	-	-	-	-	-	-	-
Unigene0006023	12	7.333333333	1.466	0.2334	0.1058	0.0931	0.3894	0.496	0.601733333	0.326166667	-0.883514928	0.484468883	0.929489918	no	FEZ	protein FEZ-like [Asparagus officinalis]	-	-	-	-	-	-	-
Unigene0006165	150.3333333	240.3333333	2.7777	4.0425	3.6205	4.359	5.6211	5.0607	3.480233333	5.0136	0.526662863	0.154059266	0.693628128	no	OBF1	PREDICTED: bZIP transcription factor 44 [Pyrus x bretschneideri]	-	-	-	-	-	GO:0097159//organic cyclic compound binding;GO:0003677//DNA binding;GO:0005488//binding;GO:0003676//nucleic acid binding;GO:1901363//heterocyclic compound binding	GO:0034654//nucleobase-containing compound biosynthetic process;GO:0018130//heterocycle biosynthetic process;GO:0044249//cellular biosynthetic process;GO:0006139//nucleobase-containing compound metabolic process;GO:0008152//metabolic process;GO:0009987//cellular process;GO:0044260//cellular macromolecule metabolic process;GO:0044238//primary metabolic process;GO:0097659//nucleic acid-templated tr…
Unigene0006400	421.3333333	368.6666667	3.742	3.2181	4.9984	3.5262	2.715	3.1262	3.986166667	3.122466667	-0.352315862	0.316295505	0.83965167	no	--	PREDICTED: probable transcription factor At3g04930 [Nicotiana tomentosiformis]	-	-	-	-	-	-	-
Unigene0006703	6.666666667	14	0.134	0.4639	0.035	0.5863	0.1147	0.5677	0.210966667	0.4229	1.003301493	0.38578369	0.876076929	no	GTL1	PREDICTED: trihelix transcription factor GTL1 isoform X4 [Vitis vinifera]	-	-	-	-	-	-	-
Unigene0006730	1035	1511	4.7323	4.7094	5.2568	7.1811	5.8359	6.313	4.8995	6.443333333	0.395172704	0.169311836	0.716660505	no	BHLH121	PREDICTED: transcription factor bHLH121 [Amborella trichopoda]	-	-	-	-	-	-	-
Unigene0006772	28.66666667	89.66666667	0.0934	0.7332	0.4725	1.7501	0.7729	1.2362	0.433033333	1.253066667	1.532913184	0.022431542	0.252663525	no	BHLH25	PREDICTED: transcription factor bHLH18-like [Nelumbo nucifera]	-	-	-	-	-	-	-
Unigene0006985	3100.333333	3120.666667	19.2963	23.4316	17.876	17.8446	18.6182	18.7712	20.2013	18.41133333	-0.133854027	0.601965267	0.971452371	no	DIVARICATA	PREDICTED: transcription factor MYB1R1-like [Nelumbo nucifera]	-	-	-	-	-	-	-
Unigene0006988	735.3333333	577	7.4655	19.7375	17.8198	15.2501	5.8201	11.2787	15.0076	10.78296667	-0.476939127	0.29752565	0.837336869	no	MADS14	PREDICTED: MADS-box transcription factor 6-like isoform X2 [Daucus carota subsp. sativus] [Daucus carota]	-	-	-	-	-	-	-
Unigene0007028	37.33333333	63.66666667	0.3884	0.7057	0.2622	0.7734	0.697	0.6594	0.4521	0.709933333	0.651041636	0.23547117	0.795980892	no	BHLH83	Transcription factor HEC3 [Glycine soja]	-	-	-	-	-	-	-
Unigene0007128	3714	3401.333333	15.0339	13.0839	12.7924	10.4383	11.12	12.1505	13.63673333	11.23626667	-0.279335321	0.26262033	0.812767496	no	ALY3	PREDICTED: protein ALWAYS EARLY 2-like isoform X1 [Phoenix dactylifera]	-	-	-	-	-	-	-
Unigene0007884	2016.333333	2548	59.2038	70.5139	59.3827	69.8928	70.2924	75.8724	63.03346667	72.0192	0.192263565	0.465011591	0.922351637	no	NAC086	PREDICTED: NAC domain-containing protein 45-like [Phoenix dactylifera]	-	-	-	-	-	-	-
Unigene0008441	3	148	0.055	0.1777	0	2.9888	3.2001	4.6597	0.077566667	3.6162	5.542893855	4.86E-15	1.07E-12	yes	APL(G2)	Myb family transcription factor APL, partial [Noccaea caerulescens]	-	-	-	-	-	-	-
Unigene0009225	420	522	4.7394	3.9392	4.1305	5.2851	4.6459	4.4021	4.2697	4.7777	0.162181561	0.618733597	0.975409027	no	GATA28	PREDICTED: GATA transcription factor 28 isoform X1 [Nelumbo nucifera]	-	-	-	-	-	-	-
Unigene0009478	820.3333333	786	18.0788	22.8017	16.9839	16.3685	14.8166	19.143	19.28813333	16.77603333	-0.201311896	0.525189476	0.944170935	no	--	PREDICTED: mediator-associated protein 1 [Amborella trichopoda]	-	-	-	-	-	-	-
Unigene0009638	273	218.6666667	4.1204	1.2748	3.6347	2.0293	2.0165	2.3462	3.009966667	2.130666667	-0.498442603	0.278613273	0.826244813	no	bdp1	Transcription factor TFIIIB component B'' [Anthurium amnicola]	-	-	-	-	-	-	-
Unigene0009758	38.33333333	24.66666667	0.0372	1.7509	0.214	0.5139	0.2864	0.4312	0.667366667	0.4105	-0.701097407	0.484350873	0.929358098	no	ONAC010	PREDICTED: NAC transcription factor 25 [Amborella trichopoda]	-	-	-	-	-	-	-
Unigene0009779	185.3333333	209	5.2396	6.7897	4.6486	7.1984	5.2451	4.7014	5.5593	5.714966667	0.039841846	0.923019602	1	no	Os08g0159800	zinc finger CCCH domain-containing protein 56 isoform X2 [Ananas comosus]	-	-	-	-	-	-	-
Unigene0009786	3919	5208.333333	31.2639	30.4245	23.1314	31.9213	42.8396	26.7822	28.27326667	33.8477	0.259619223	0.344348294	0.854463032	no	AP2	AP2L3 [Pinus tabuliformis]	-	-	-	-	-	-	-
Unigene0009936	75.33333333	161.6666667	1.7159	0.877	0.8335	1.1997	2.439	2.9247	1.142133333	2.1878	0.937749777	0.059376276	0.451569261	no	WRKY51	PREDICTED: probable WRKY transcription factor 51 isoform X2 [Nelumbo nucifera]	-	-	-	-	-	-	-
Unigene0009941	35	19.66666667	0.6155	0.9539	0.69	0.3645	0.3951	0.3922	0.753133333	0.383933333	-0.972049478	0.103618408	0.591253819	no	IND	PREDICTED: transcription factor HEC3-like [Arachis duranensis]	-	-	-	-	-	-	-
Unigene0009966	2911.666667	4620	20.4318	27.3465	20.5182	31.7398	30.6948	35.8763	22.7655	32.7703	0.525539735	0.042348996	0.374397832	no	BEH4	PREDICTED: BES1/BZR1 homolog protein 4-like [Pyrus x bretschneideri]	-	-	-	-	-	-	-
Unigene0010042	567.6666667	447	2.6943	3.4125	2.7087	2.113	2.1706	1.9989	2.9385	2.094166667	-0.488703633	0.130645178	0.651351157	no	ASIL2	BnaC05g43000D [Brassica napus]	Metabolism	Global and Overview;Nucleotide metabolism	ko01100//Metabolic pathways;ko00240//Pyrimidine metabolism	K09903	-	-	-
Unigene0010266	40	43.33333333	0.7908	1.0639	0.8038	0.9159	0.9862	0.7054	0.886166667	0.869166667	-0.027945214	0.963541225	1	no	MYB5	MYB-like protein [Taxus globosa]	-	-	-	-	-	-	-
Unigene0010338	671.6666667	753.3333333	4.6464	3.23	4.2167	4.5868	3.9096	3.6651	4.031033333	4.053833333	0.008137063	0.981449961	1	no	MBD8	methyl-CpG-binding domain protein [Medicago truncatula]	-	-	-	-	-	-	-
Unigene0010558	7.666666667	16	0.3832	0.1179	0.2339	0.1765	0.984	0.1709	0.245	0.4438	0.857127918	0.421322748	0.898324117	no	HAT22	PREDICTED: homeobox-leucine zipper protein HAT9-like [Fragaria vesca subsp. vesca] [Fragaria vesca]	-	-	-	-	GO:0043226//organelle;GO:0043227//membrane-bounded organelle;GO:0005623//cell;GO:0005622//intracellular;GO:0044424//intracellular part;GO:0044464//cell part;GO:0043231//intracellular membrane-bounded organelle;GO:0043229//intracellular organelle	GO:0097159//organic cyclic compound binding;GO:1901363//heterocyclic compound binding;GO:0003677//DNA binding;GO:0001071//nucleic acid binding transcription factor activity;GO:0005488//binding;GO:0003676//nucleic acid binding	GO:0009059//macromolecule biosynthetic process;GO:0044271//cellular nitrogen compound biosynthetic process;GO:0006807//nitrogen compound metabolic process;GO:0044237//cellular metabolic process;GO:0034645//cellular macromolecule biosynthetic process;GO:0032774//RNA biosynthetic process;GO:0006351//transcription, DNA-templated;GO:0016070//RNA metabolic process;GO:0010467//gene expression;GO:190136…
Unigene0010570	14	37.66666667	0.1068	0.345	0.6702	1.377	0.7538	0.5714	0.374	0.900733333	1.268061782	0.098045394	0.575463973	no	SOC1	TM3-like MADS-box transcription factor [Cryptomeria japonica]	-	-	-	-	-	-	-
Unigene0010583	1745	1907	14.483	15.4464	13.4364	14.3741	14.2612	14.1658	14.45526667	14.26703333	-0.018909849	0.944539034	1	no	Os01g0917400	PREDICTED: zinc finger CCCH domain-containing protein 12 isoform X1 [Nelumbo nucifera]	-	-	-	-	-	-	-
Unigene0010641	2175.666667	3447	13.5699	12.6309	13.4207	20.0254	17.721	18.7821	13.20716667	18.84283333	0.512694916	0.0427902	0.376737628	no	rnj	PREDICTED: ribonuclease J isoform X1 [Phoenix dactylifera]	-	-	-	-	-	GO:0003824//catalytic activity;GO:0005488//binding;GO:0016787//hydrolase activity	-
Unigene0010719	3040.666667	3138	18.0016	17.6273	17.4473	15.341	17.2134	16.7051	17.69206667	16.41983333	-0.1076631	0.665274727	0.989910307	no	PIF3	PREDICTED: transcription factor PIF3 isoform X2 [Nelumbo nucifera]	Environmental Information Processing;Organismal Systems	Signal transduction;Environmental adaptation	ko04075//Plant hormone signal transduction;ko04712//Circadian rhythm - plant	K12126	-	-	-
Unigene0010890	3694.333333	2087	24.7475	14.0743	23.2896	12.0879	8.4128	10.8977	20.7038	10.46613333	-0.984167043	0.00119141	0.029103337	no	SPL14	PREDICTED: squamosa promoter-binding-like protein 14 [Nelumbo nucifera]	-	-	-	-	-	-	-
Unigene0011066	6.666666667	43	0.1881	0.1303	0.1476	0.6499	1.288	0.7342	0.155333333	0.8907	2.51957214	0.000373807	0.011211242	yes	ERF114(ERF)	ethylene-responsive transcription factor ERF113 [Ananas comosus]	-	-	-	-	-	-	-
Unigene0011137	1729.333333	1897.333333	18.3754	21.4991	19.4204	19.5597	21.3803	17.7173	19.76496667	19.55243333	-0.015597358	0.955263647	1	no	--	C2H2-like zinc finger protein [Arabidopsis thaliana]	-	-	-	-	GO:0044424//intracellular part;GO:0043227//membrane-bounded organelle;GO:0043226//organelle;GO:0005737//cytoplasm;GO:0009536//plastid;GO:0044464//cell part;GO:0044444//cytoplasmic part;GO:0043231//intracellular membrane-bounded organelle;GO:0005623//cell;GO:0043229//intracellular organelle;GO:0005622//intracellular	GO:0043169//cation binding;GO:0043167//ion binding;GO:0046872//metal ion binding;GO:0005488//binding;GO:0001071//nucleic acid binding transcription factor activity;GO:0046914//transition metal ion binding	GO:0034645//cellular macromolecule biosynthetic process;GO:0006351//transcription, DNA-templated;GO:0018130//heterocycle biosynthetic process;GO:1901362//organic cyclic compound biosynthetic process;GO:0034641//cellular nitrogen compound metabolic process;GO:1901576//organic substance biosynthetic process;GO:0044260//cellular macromolecule metabolic process;GO:0009058//biosynthetic process;GO:004…
Unigene0011192	836	594	6.7242	1.8625	6.8947	4.1168	2.0823	3.5608	5.160466667	3.2533	-0.665597671	0.165654141	0.708228748	no	ERF071	Ethylene-responsive transcription factor 1 [Aegilops tauschii]	-	-	-	-	-	-	GO:0006139//nucleobase-containing compound metabolic process;GO:0044237//cellular metabolic process;GO:0032774//RNA biosynthetic process;GO:0008152//metabolic process;GO:1901576//organic substance biosynthetic process;GO:0034654//nucleobase-containing compound biosynthetic process;GO:0009058//biosynthetic process;GO:0071704//organic substance metabolic process;GO:0006725//cellular aromatic compou…
Unigene0011254	1878.666667	1904	14.7173	14.9005	19.777	17.3003	14.032	13.609	16.46493333	14.98043333	-0.136317314	0.633814724	0.980731988	no	MYB4	PREDICTED: myb-related protein 308 [Amborella trichopoda]	-	-	-	-	-	-	-
Unigene0011320	34.66666667	27.66666667	0.8915	0.2811	1.1147	0.7412	0.5955	0.2715	0.762433333	0.536066667	-0.508198766	0.471946924	0.925161576	no	AGL62	agamous-like MADS-box protein AGL29 [Ananas comosus]	-	-	-	-	-	-	-
Unigene0011521	0	2	0	0	0	0	0.2741	0.1429	0.001	0.139	7.118941073	0.27374821	0.821349021	no	LBD11	PREDICTED: LOB domain-containing protein 1-like [Nicotiana sylvestris]	-	-	-	-	-	-	-
Unigene0011652	367	456.6666667	4.3922	4.9385	2.3319	4.2868	5.3038	3.6077	3.887533333	4.399433333	0.178462665	0.649989174	0.985645372	no	BHLH68	PREDICTED: transcription factor bHLH112 isoform X1 [Vitis vinifera]	-	-	-	-	-	-	-
Unigene0011741	0.333333333	1.333333333	0.0681	0	0	0.1883	0.0583	0	0.0227	0.0822	1.856446096	0.660213711	0.988406676	no	EREBP1	ethylene response factor 1 [Gossypium barbadense]	-	-	-	-	-	-	-
Unigene0011787	293.6666667	310.6666667	4.7771	7.5324	4.5868	5.9043	5.4515	4.9453	5.6321	5.4337	-0.051738035	0.888558254	1	no	AGL61	MADS-domain transcription factor [Selaginella moellendorffii]	-	-	-	-	-	-	-
Unigene0011835	10	9.333333333	0.2912	1.0755	0	0.5366	0.0415	0.6495	0.455566667	0.4092	-0.154856045	0.938920291	1	no	RL9	Homeodomain-like protein [Cynara cardunculus var. scolymus] [Cynara cardunculus]	-	-	-	-	-	-	-
Unigene0012144	4546.666667	4620	13.5749	9.4986	13.109	12.3342	9.9036	10.7219	12.06083333	10.98656667	-0.134588982	0.603639238	0.971452371	no	NFYB1	PREDICTED: nuclear transcription factor Y subunit B-1 [Amborella trichopoda]	-	-	-	-	GO:0005622//intracellular;GO:0005623//cell;GO:0043227//membrane-bounded organelle;GO:0043231//intracellular membrane-bounded organelle;GO:0044464//cell part;GO:0044424//intracellular part;GO:0043226//organelle;GO:0043229//intracellular organelle	GO:0046983//protein dimerization activity;GO:0097159//organic cyclic compound binding;GO:0005515//protein binding;GO:0003677//DNA binding;GO:0005488//binding;GO:0003676//nucleic acid binding;GO:1901363//heterocyclic compound binding	GO:0071704//organic substance metabolic process;GO:0009059//macromolecule biosynthetic process;GO:0044237//cellular metabolic process;GO:0008152//metabolic process;GO:0006139//nucleobase-containing compound metabolic process;GO:0016070//RNA metabolic process;GO:0034645//cellular macromolecule biosynthetic process;GO:0019438//aromatic compound biosynthetic process;GO:0044249//cellular biosynthetic…
Unigene0012339	416.6666667	979	5.0287	5.4311	3.8788	7.725	11.8309	10.8286	4.779533333	10.12816667	1.083431383	0.001504973	0.035138827	yes	MYB44	R2R3-MYB transcription factor MYB9 [Picea glauca]	-	-	-	-	-	-	-
Unigene0012605	11	10.66666667	0.7613	0.7668	0.7241	1.339	0.2369	0.4322	0.750733333	0.669366667	-0.165503833	0.886469028	1	no	--	MADS-box protein SOC1 [Morus notabilis]	-	-	-	-	-	-	-
Unigene0012770	23	12	0.2713	1.7219	0.2129	0.7498	0.1161	0.242	0.735366667	0.3693	-0.99367052	0.340818711	0.854463032	no	BHLH140	PREDICTED: transcription factor bHLH54-like [Nicotiana tabacum]	-	-	-	-	-	-	-
Unigene0012771	200.6666667	264.3333333	2.9802	3.7175	2.6537	3.8847	3.2019	4.115	3.117133333	3.733866667	0.260450544	0.470420758	0.924330496	no	DOF5.4	Dof3 [Pinus pinaster]	-	-	-	-	-	-	-
Unigene0012929	4699.333333	3971.666667	35.5569	26.9682	32.2714	22.4239	24.3147	25.0277	31.59883333	23.9221	-0.401527251	0.105923627	0.596938673	no	Os03g0698800	PREDICTED: zinc finger CCCH domain-containing protein 30-like [Pyrus x bretschneideri]	-	-	-	-	-	-	-
Unigene0012965	876	758	4.6598	5.7531	5.2233	4.4378	3.802	4.0004	5.212066667	4.080066667	-0.353262812	0.247225348	0.806332348	no	CG1	PREDICTED: zinc finger CCCH domain-containing protein 16 isoform X1 [Citrus sinensis]	Genetic Information Processing	Translation	ko03013//RNA transport	K14321	-	-	-
Unigene0013059	1184	1529.666667	16.319	21.226	18.0406	21.6789	21.1347	22.1556	18.52853333	21.6564	0.225044754	0.432027064	0.904170185	no	ASIL2	PREDICTED: trihelix transcription factor ASIL1-like [Jatropha curcas]	-	-	-	-	-	-	-
Unigene0013326	167.6666667	34.33333333	4.4498	4.8364	4.6852	1.427	0.8195	0.3517	4.657133333	0.866066667	-2.426892199	4.02E-06	0.000221081	yes	ERF018	PREDICTED: ethylene-responsive transcription factor RAP2-9-like [Nelumbo nucifera]	-	-	-	-	-	-	-
Unigene0013927	4022.333333	3946.333333	27.7234	31.819	27.7302	25.0197	25.8793	26.4222	29.09086667	25.77373333	-0.17466475	0.472129867	0.925370146	no	VOZ1	PREDICTED: transcription factor VOZ1 [Amborella trichopoda]	-	-	-	-	-	-	-
Unigene0013986	365.3333333	279.6666667	4.7179	6.7078	8.0332	3.702	5.0052	4.6247	6.4863	4.443966667	-0.545547757	0.139395286	0.669667722	no	ERF1A	PREDICTED: ethylene-responsive transcription factor 6 [Brassica oleracea var. oleracea] [Brassica oleracea]	-	-	-	-	-	-	-
Unigene0014056	1016.333333	982.6666667	12.4358	15.9064	12.2728	12.2949	11.3407	11.9774	13.53833333	11.871	-0.189608673	0.529158306	0.945824351	no	--	PREDICTED: hypermethylated in cancer 1 protein [Oryza sativa Japonica Group]	-	-	-	-	-	-	-
Unigene0014118	345.3333333	724.3333333	8.0929	6.832	2.5747	6.6416	13.5713	13.0163	5.8332	11.0764	0.925129614	0.047544898	0.400188132	no	ERF2	transcription factor 3, partial [Pinus tabuliformis]	-	-	-	-	-	-	-
Unigene0014130	5584.333333	4464.666667	17.445	18.444	16.5954	12.7051	12.9683	12.1828	17.4948	12.61873333	-0.471359072	0.045875377	0.392384867	no	NFYA7	NFYA3 [Larix kaempferi]	-	-	-	-	-	-	-
Unigene0014386	3.333333333	36	0.0701	0.2589	0	1.0978	0.9299	1.3443	0.109666667	1.124	3.357445047	0.000323455	0.009936153	yes	At3g06220(B3)	PREDICTED: B3 domain-containing protein Os01g0723500 [Beta vulgaris subsp. vulgaris] [Beta vulgaris]	-	-	-	-	-	-	-
Unigene0014410	563.6666667	538	4.0591	5.4356	4.4312	3.9868	4.1775	3.8603	4.641966667	4.0082	-0.211781665	0.51173858	0.938591836	no	TCP19	proliferation cell factor-like protein 5, partial [Hypoxis decumbens]	-	-	-	-	-	-	-
Unigene0014619	413	642	3.399	4.1457	4.2636	5.3199	5.9919	5.1942	3.9361	5.502	0.483189266	0.134415005	0.659795022	no	--	Zinc finger family protein [Theobroma cacao]	-	-	-	-	-	-	-
Unigene0014691	376.3333333	437.6666667	2.9726	1.7794	3.2739	2.5879	2.7633	2.9436	2.6753	2.764933333	0.047544015	0.89765596	1	no	--	30S ribosomal S5 [Gossypium arboreum]	-	-	-	-	-	-	-
Unigene0014706	21.33333333	32.66666667	1.2045	2.7008	1.4403	2.6949	2.7245	2.0722	1.781866667	2.4972	0.486921984	0.441513229	0.907865334	no	APL	Myb family transcription factor APL, partial [Noccaea caerulescens]	-	-	-	-	-	GO:0001071//nucleic acid binding transcription factor activity	GO:0044702//single organism reproductive process;GO:0000003//reproduction;GO:0044699//single-organism process;GO:0022414//reproductive process;GO:0009566//fertilization;GO:0044703//multi-organism reproductive process;GO:0019953//sexual reproduction;GO:0051704//multi-organism process
Unigene0014885	52.33333333	84.66666667	0.3652	1.1279	0.4085	1.5664	0.3665	0.9549	0.633866667	0.9626	0.602757021	0.346186472	0.854463032	no	Os10g0391300	PREDICTED: zinc finger CCCH domain-containing protein 62-like [Nelumbo nucifera]	-	-	-	-	-	-	-
Unigene0014936	2313	2610.333333	9.2146	7.8004	8.2578	7.6987	7.8677	10.0729	8.424266667	8.546433333	0.020771363	0.938832198	1	no	NFXL1	PREDICTED: NF-X1-type zinc finger protein NFXL1 [Amborella trichopoda]	-	-	-	-	-	-	-
Unigene0015030	49	38	1.2387	1.3181	0.4393	0.6963	1.0781	0.3371	0.9987	0.703833333	-0.50481753	0.430920877	0.904036051	no	ERF2	BnaC01g10100D [Brassica napus]	-	-	-	-	-	-	-
Unigene0015130	1236.666667	1603.666667	7.8463	7.8926	6.5484	9.0569	7.05	10.0877	7.4291	8.731533333	0.23304758	0.431547837	0.904132137	no	APRR2	PREDICTED: two-component response regulator-like APRR2 isoform X3 [Nelumbo nucifera]	-	-	-	-	-	-	-
Unigene0015143	268	278.6666667	2.7984	2.11	2.5277	2.1742	2.411	2.3382	2.4787	2.3078	-0.103065469	0.770638919	1	no	FAMA	transcription factor FAMA, partial [Picea smithiana]	-	-	-	-	-	-	-
Unigene0015201	475.6666667	510	4.031	3.7062	4.1472	4.2254	3.2196	4.0388	3.961466667	3.827933333	-0.049468959	0.881155547	1	no	MYB5	MYB transcription factor [Paeonia suffruticosa]	-	-	-	-	-	-	-
Unigene0015320	117	108	1.6486	2.3417	1.443	1.7963	1.7366	1.0323	1.8111	1.521733333	-0.251150642	0.56345496	0.959277997	no	--	PREDICTED: agamous-like MADS-box protein AGL80 [Gossypium hirsutum]	-	-	-	-	-	-	-
Unigene0015341	1289.333333	819.6666667	15.4703	7.8432	17.6328	7.311	3.0799	12.8589	13.64876667	7.749933333	-0.816514787	0.089974188	0.553208065	no	HY5	PREDICTED: transcription factor HY5-like, partial [Juglans regia]	Organismal Systems	Environmental adaptation	ko04712//Circadian rhythm - plant	K16241	-	-	-
Unigene0015485	90.66666667	66.33333333	1.0496	0.796	0.6668	0.5785	0.6978	0.3762	0.837466667	0.550833333	-0.604415903	0.192550287	0.746028102	no	PLT2	aintegumenta-like transcription factor baby boom [Larix gmelinii var. olgensis x Larix kaempferi] [Larix gmelinii]	-	-	-	-	-	-	-
Unigene0015557	272	267.3333333	2.1691	3.3172	2.1295	2.6586	1.4557	2.7447	2.5386	2.286333333	-0.150997337	0.708727135	0.997062859	no	POSF21	PREDICTED: probable transcription factor PosF21 [Nelumbo nucifera]	-	-	-	-	-	-	-
Unigene0015622	166.3333333	541.6666667	4.1183	3.2492	5.0401	7.4962	12.6036	15.7858	4.135866667	11.96186667	1.53218096	0.000160487	0.005488676	yes	WRKY51	PREDICTED: probable WRKY transcription factor 51 [Gossypium arboreum]	-	-	-	-	-	-	-
Unigene0015636	2062.666667	2505.666667	10.0564	9.4513	9.4797	10.589	11.2664	9.8129	9.662466667	10.5561	0.127613486	0.623640253	0.977775117	no	GTL1	PREDICTED: trihelix transcription factor GTL1-like [Nelumbo nucifera]	-	-	-	-	-	-	-
Unigene0015777	8212.333333	9808.333333	36.4021	32.4086	30.265	35.2153	35.4787	35.9235	33.02523333	35.53916667	0.105841098	0.646002404	0.985645372	no	ARF6	PREDICTED: auxin response factor 6 isoform X2 [Jatropha curcas]	-	-	-	-	-	-	GO:0006807//nitrogen compound metabolic process;GO:1901362//organic cyclic compound biosynthetic process;GO:0009719//response to endogenous stimulus;GO:0071704//organic substance metabolic process;GO:0043170//macromolecule metabolic process;GO:0010033//response to organic substance;GO:0016070//RNA metabolic process;GO:0046483//heterocycle metabolic process;GO:0034645//cellular macromolecule biosy…
Unigene0016213	464	488.6666667	5.5239	11.3067	6.7065	5.5851	9.0393	7.8872	7.8457	7.503866667	-0.064267978	0.871208836	1	no	NAC025	NAC domain protein [Pinus massoniana]	-	-	-	-	-	-	-
Unigene0016215	204	221.6666667	1.582	2.7279	1.9622	2.0656	1.8831	2.2524	2.0907	2.067033333	-0.016424407	0.966275805	1	no	MYB5	PREDICTED: transcription repressor MYB6 [Eucalyptus grandis]	-	-	-	-	-	-	-
Unigene0016526	3.666666667	4.666666667	0.8438	0.0779	0	0.0777	0.0722	0.9033	0.307233333	0.351066667	0.192410271	1	1	no	--	Copia protein, partial [Cajanus cajan]	-	-	-	-	-	-	-
Unigene0016627	4	6.333333333	0.5417	0.0625	0.2125	0.6862	0.3477	0.1208	0.272233333	0.3849	0.499639944	0.770369164	1	no	CDF2	dof transcription factor [Pinus pinaster]	-	-	-	-	-	-	-
Unigene0016645	11.33333333	8.333333333	1.2588	0.3321	0.439	0.2209	0.4617	0.6417	0.676633333	0.441433333	-0.616178677	0.576575267	0.962789014	no	MYC	Myc protein [Anthurium amnicola]	-	-	-	-	-	-	-
Unigene0016650	833	986	8.3854	9.3997	7.7095	10.3546	9.2376	7.7302	8.4982	9.107466667	0.099892513	0.746821026	1	no	PHL1	PREDICTED: protein PHOSPHATE STARVATION RESPONSE 1 isoform X2 [Vigna angularis]	-	-	-	-	-	-	-
Unigene0016696	982.6666667	770.6666667	11.4471	16.5673	10.7385	8.7491	11.9617	6.8036	12.91763333	9.171466667	-0.494117407	0.15872162	0.701220117	no	MYB44	R2R3-MYB transcription factor MYB9 [Picea glauca]	-	-	-	-	-	-	-
Unigene0016960	548.6666667	604.3333333	6.2792	6.7755	4.5589	5.4731	6.2435	5.8547	5.8712	5.8571	-0.003468876	0.993335156	1	no	MYC4	JAMYC4 [Taxus cuspidata]	Environmental Information Processing	Signal transduction	ko04075//Plant hormone signal transduction	K13422	-	-	-
Unigene0016970	21.33333333	41.66666667	0.3335	0.241	0.3489	0.4676	0.8563	0.2716	0.3078	0.531833333	0.788980971	0.222640089	0.780282217	no	atf1	--	-	-	-	-	-	-	-
Unigene0017228	139	301.3333333	1.7359	1.2106	0.8405	3.2496	2.4973	1.6968	1.262333333	2.481233333	0.974964491	0.023367955	0.25921104	no	Os01g0905400	PREDICTED: B3 domain-containing protein REM16-like isoform X2 [Musa acuminata subsp. malaccensis] [Musa acuminata]	-	-	-	-	-	-	-
Unigene0017310	112.6666667	137.6666667	0.8749	0.5903	0.7957	0.9052	0.7661	0.8044	0.753633333	0.825233333	0.13093932	0.743450398	1	no	DPB	PREDICTED: transcription factor-like protein DPB isoform X3 [Nelumbo nucifera]	-	-	-	-	-	-	-
Unigene0017427	37.66666667	65.33333333	0.5117	1.0187	0.2008	0.7366	0.9854	1.0556	0.577066667	0.925866667	0.682066449	0.274315127	0.821644445	no	ERF112	Ethylene-responsive transcription factor [Morus notabilis]	-	-	-	-	-	-	-
Unigene0017470	25.66666667	13	0.659	0.7605	0.6608	0.4553	0.282	0.2204	0.693433333	0.319233333	-1.119145887	0.105276477	0.595606501	no	HAT14	PREDICTED: homeobox-leucine zipper protein HOX11 [Amborella trichopoda]	-	-	-	-	-	-	-
Unigene0017627	482.3333333	565.6666667	3.7854	2.8687	3.8309	3.5613	3.8141	3.6175	3.495	3.6643	0.068245168	0.83512147	1	no	TERF1	PREDICTED: chitinase-like protein PB1E7.04c [Nelumbo nucifera]	-	-	-	-	-	-	-
Unigene0017709	7447	8380	111.0589	76.8527	118.6351	103.6615	108.9861	94.8933	102.1822333	102.5136333	0.004671414	0.985462232	1	no	OBF1	PREDICTED: bZIP transcription factor 11 [Vitis vinifera]	-	-	-	-	-	-	-
Unigene0017715	13.66666667	11.33333333	0.8817	0.5746	0.6512	0.1911	0.6659	0.694	0.7025	0.517	-0.442333945	0.644140746	0.985116471	no	ROC4	TPA_inf: class IV HD-Zip protein HDZ44 [Physcomitrella patens]	-	-	-	-	-	-	-
Unigene0017918	5.333333333	10.33333333	0.7223	0	0	0.4159	0.3477	0.4832	0.240766667	0.4156	0.787559985	0.626850198	0.979128678	no	hac1	Transcriptional activator hacA [Anthurium amnicola]	Organismal Systems	Environmental adaptation	ko04712//Circadian rhythm - plant	K16241	-	-	-
Unigene0018716	6.333333333	0	0.2135	0.2464	0.5585	0	0	0	0.339466667	0.001	-8.407126108	0.0118211	0.165177165	no	--	--	-	-	-	-	-	-	-
Unigene0020195	3.333333333	0	0	0.9207	0	0	0	0	0.3069	0.001	-8.261624836	0.266533515	0.813234758	no	mkrn1	Zinc finger, CCCH-type [Ostreococcus tauri]	Genetic Information Processing	Translation	ko03015//mRNA surveillance pathway	K14404	-	-	-
Unigene0020723	7.333333333	5	0.2404	0	1.132	0.443	0	0.3753	0.457466667	0.272766667	-0.745999274	0.703440393	0.995496164	no	--	hypothetical protein SHCRBa_026_H12_R_10 [Saccharum hybrid cultivar R570]	-	-	-	-	-	-	-
Unigene0021079	0.333333333	3	0	0.0904	0	0	0.0838	0.699	0.030133333	0.260933333	3.114249078	0.368761751	0.867835297	no	PCF7	PREDICTED: transcription factor TCP4-like isoform X2 [Daucus carota subsp. sativus] [Daucus carota]	-	-	-	-	-	-	-
Unigene0021427	12.66666667	29	0.916	0.3383	0.4792	1.0971	0.7056	1.7569	0.577833333	1.186533333	1.038027295	0.157164478	0.698385293	no	CPC	myb transcription factor [Medicago truncatula]	-	-	-	-	-	GO:0005488//binding	GO:0009987//cellular process;GO:0048468//cell development;GO:0000902//cell morphogenesis;GO:0032989//cellular component morphogenesis;GO:0009653//anatomical structure morphogenesis;GO:0000904//cell morphogenesis involved in differentiation;GO:0016043//cellular component organization;GO:0071840//cellular component organization or biogenesis;GO:0032502//developmental process;GO:0044763//single-orga…
Unigene0021562	0	8	0	0	0	0.7262	0	0.7031	0.001	0.476433333	8.896130544	0.023980345	0.263548443	no	BHLH35	PREDICTED: transcription factor FER-LIKE IRON DEFICIENCY-INDUCED TRANSCRIPTION FACTOR [Prunus mume]	-	-	-	-	-	GO:0005488//binding	-
Unigene0021649	12.66666667	10.33333333	0.3125	0.6348	0.1962	0.5183	0.214	0.1394	0.381166667	0.290566667	-0.391552751	0.713065318	0.998291022	no	At3g19360	zinc finger C-x8-C-x5-C-x3-H type family protein [Medicago truncatula]	-	-	-	-	-	-	-
Unigene0021677	12.33333333	5.333333333	0.639	1.2455	0.6686	0.1308	0.4861	0.38	0.851033333	0.3323	-1.356729348	0.190564221	0.744659853	no	--	PREDICTED: myb family transcription factor PHL8 [Solanum lycopersicum]	-	-	-	-	-	-	-
Unigene0021682	2	2	0	0.1717	0.3891	0	0.1591	0.3317	0.186933333	0.1636	-0.1923511	1	1	no	NAC012	NAC domain-containing protein [Dorcoceras hygrometricum]	-	-	-	-	-	-	GO:0006139//nucleobase-containing compound metabolic process;GO:0034654//nucleobase-containing compound biosynthetic process;GO:0044249//cellular biosynthetic process;GO:0006351//transcription, DNA-templated;GO:0044238//primary metabolic process;GO:0034641//cellular nitrogen compound metabolic process;GO:0016070//RNA metabolic process;GO:1901576//organic substance biosynthetic process;GO:1901360/…
Unigene0022317	6	0	0.1859	0.8583	0.5836	0	0	0	0.5426	0.001	-9.083745237	0.017204749	0.212615507	no	--	--	-	-	-	-	-	-	-
Unigene0023745	1	11.33333333	0.0474	0.0875	0	0.3492	0.7706	0.2959	0.044966667	0.4719	3.391553324	0.018498676	0.222764076	no	--	--	-	-	-	-	-	-	-
Unigene0023803	0	7.333333333	0	0	0	0	1.124	0.3446	0.001	0.489533333	8.935263289	0.039595808	0.359326477	no	LBD11	PREDICTED: LOB domain-containing protein 1-like [Nicotiana attenuata]	-	-	-	-	-	-	-
Unigene0023838	182	272.3333333	2.5268	3.7359	2.876	4.2626	4.0039	4.1426	3.046233333	4.136366667	0.441337626	0.221375176	0.779101114	no	ZHD1	PREDICTED: zinc-finger homeodomain protein 4 [Nelumbo nucifera]	-	-	-	-	-	-	-
Unigene0023855	2.666666667	0	0.7565	0	0	0	0	0	0.252166667	0.001	-7.978233771	0.307845199	0.838508349	no	SFL2	Heat shock factor protein 1 [Anthurium amnicola]	-	-	-	-	-	-	GO:0009628//response to abiotic stimulus;GO:0009416//response to light stimulus;GO:0034645//cellular macromolecule biosynthetic process;GO:0009719//response to endogenous stimulus;GO:0034641//cellular nitrogen compound metabolic process;GO:0006725//cellular aromatic compound metabolic process;GO:0006979//response to oxidative stress;GO:0044249//cellular biosynthetic process;GO:0042221//response t…
Unigene0023916	0.666666667	7	0	0.1164	0	0	0.5396	0.6186	0.0388	0.386066667	3.314721439	0.148380154	0.685147732	no	ERF113	AP2/ERF domain-containing transcription factor, partial [Vernicia montana]	-	-	-	-	-	-	-
Unigene0024116	6	19	0.1503	0.1387	0.3931	0.5538	0.4823	0.8713	0.227366667	0.6358	1.483552255	0.092562166	0.559918124	no	DREB2A	DREB protein [Taxus cuspidata]	-	-	-	-	GO:0005622//intracellular;GO:0043229//intracellular organelle;GO:0043226//organelle;GO:0043231//intracellular membrane-bounded organelle;GO:0043227//membrane-bounded organelle;GO:0005623//cell;GO:0044424//intracellular part;GO:0044464//cell part	GO:0001071//nucleic acid binding transcription factor activity	GO:0009628//response to abiotic stimulus;GO:0034641//cellular nitrogen compound metabolic process;GO:0034645//cellular macromolecule biosynthetic process;GO:0008152//metabolic process;GO:0016070//RNA metabolic process;GO:0044260//cellular macromolecule metabolic process;GO:0044249//cellular biosynthetic process;GO:0032774//RNA biosynthetic process;GO:0009266//response to temperature stimulus;GO:0…
Unigene0024456	0	4.333333333	0	0	0	0.2972	0	0.6476	0.001	0.314933333	8.298902654	0.11187284	0.610425859	no	MADS3	MADS-domain transcription factor DAL20 [Picea abies]	-	-	-	-	GO:0005623//cell;GO:0043227//membrane-bounded organelle;GO:0043226//organelle;GO:0044424//intracellular part;GO:0043229//intracellular organelle;GO:0044464//cell part;GO:0043231//intracellular membrane-bounded organelle;GO:0005622//intracellular	GO:0005515//protein binding;GO:0005488//binding	GO:0044237//cellular metabolic process;GO:0044271//cellular nitrogen compound biosynthetic process;GO:0090304//nucleic acid metabolic process;GO:0097659//nucleic acid-templated transcription;GO:0006351//transcription, DNA-templated;GO:1901360//organic cyclic compound metabolic process;GO:0008152//metabolic process;GO:0043170//macromolecule metabolic process;GO:0034645//cellular macromolecule bios…
Unigene0026405	1	4	0	0	0.2383	0.7693	0.065	0	0.079433333	0.2781	1.807787294	0.499166764	0.932944515	no	AMS	PREDICTED: transcription factor ABORTED MICROSPORES [Theobroma cacao]	-	-	-	-	-	-	-
Unigene0029052	3.333333333	0	0	0.9465	0	0	0	0	0.3155	0.001	-8.301496195	0.266793002	0.813234758	no	U2AF35B	PREDICTED: splicing factor U2af small subunit B-like [Brassica oleracea var. oleracea] [Brassica oleracea]	Genetic Information Processing	Transcription	ko03040//Spliceosome	K12836	GO:0043227//membrane-bounded organelle;GO:0044424//intracellular part;GO:0044464//cell part;GO:0043229//intracellular organelle;GO:0005623//cell;GO:0005622//intracellular;GO:0043226//organelle;GO:0043231//intracellular membrane-bounded organelle	GO:0097159//organic cyclic compound binding;GO:0043169//cation binding;GO:0003676//nucleic acid binding;GO:0005488//binding;GO:0043167//ion binding;GO:1901363//heterocyclic compound binding	GO:0044707//single-multicellular organism process;GO:0009908//flower development;GO:0050794//regulation of cellular process;GO:0003006//developmental process involved in reproduction;GO:0007275//multicellular organism development;GO:1901701//cellular response to oxygen-containing compound;GO:0061458//reproductive system development;GO:0044767//single-organism developmental process;GO:0006464//cel…
Unigene0029784	4.333333333	7.666666667	0.391	0.1604	0	0.04	0.4462	0.3875	0.1838	0.291233333	0.664038723	0.722396226	1	no	MNL1	Zinc finger protein MSN4 [Anthurium amnicola]	-	-	-	-	-	-	-
Unigene0030076	1354.333333	1477.666667	15.2795	15.9634	19.3392	17.2717	16.5189	15.7486	16.8607	16.51306667	-0.030056363	0.916729102	1	no	At4g06634	PREDICTED: uncharacterized zinc finger protein At4g06634 [Nelumbo nucifera]	-	-	-	-	-	-	-
Unigene0030371	2.666666667	0	0	0	0.7915	0	0	0	0.263833333	0.001	-8.043483039	0.310890188	0.838508349	no	gtaF	GATA type zinc finger transcription factor family protein [Medicago truncatula]	-	-	-	-	-	-	-
Unigene0030557	24.33333333	33.33333333	0.4986	0.7312	0.89	1.27	0.1506	1.2297	0.7066	0.883433333	0.322227519	0.68822232	0.995250822	no	WIN1	ethylene responsive element [Zea mays]	-	-	-	-	-	-	-
Unigene0030752	6.333333333	15	0.0944	0.2614	0.543	0.7824	0.7672	0.3367	0.2996	0.628766667	1.069487113	0.26874226	0.815835024	no	LBD1	PREDICTED: LOB domain-containing protein 1-like [Nicotiana tomentosiformis]	-	-	-	-	-	-	-
Unigene0031068	2	7.666666667	0	0	0.4972	1.0945	0	0.5652	0.165733333	0.553233333	1.739024288	0.430839939	0.904036051	no	--	--	-	-	-	-	-	-	-
Unigene0032811	20.33333333	5.666666667	0.739	0.7676	1.3048	0.0851	0	0.618	0.937133333	0.234366667	-1.999486932	0.070696643	0.492321305	no	NAC002	NAC domain protein [Pinus massoniana]	-	-	-	-	-	-	-
Unigene0033337	0	4	0	0	0	0.35	0.4877	0.1694	0.001	0.3357	8.391028727	0.067196115	0.480710024	no	MYB3	Myb-related protein Zm1 [Cajanus cajan]	-	-	-	-	-	-	-
Unigene0033399	12.33333333	5.333333333	0.5043	0.9313	0.3694	0	0.6907	0	0.601666667	0.230233333	-1.385867708	0.363706691	0.864149128	no	DREB1C	PREDICTED: ethylene-responsive transcription factor ERF039-like [Musa acuminata subsp. malaccensis] [Musa acuminata]	-	-	-	-	-	-	-
Unigene0033588	2.333333333	25.66666667	0	0.0358	0.2433	1.0356	0.6635	0.9682	0.093033333	0.8891	3.256526069	0.002773442	0.056415474	no	ZHD5	mini zinc finger 1 [Welwitschia mirabilis]	-	-	-	-	-	-	-
Unigene0033631	6.333333333	0.666666667	0	1.5093	0	0.1585	0	0	0.5031	0.052833333	-3.25132485	0.270688307	0.818316789	no	ERF113	Ethylene-responsive transcription factor ERF113 [Aegilops tauschii]	-	-	-	-	GO:0043226//organelle;GO:0043229//intracellular organelle;GO:0044424//intracellular part;GO:0005623//cell;GO:0043231//intracellular membrane-bounded organelle;GO:0043227//membrane-bounded organelle;GO:0005622//intracellular;GO:0044464//cell part	GO:0001071//nucleic acid binding transcription factor activity	GO:0071704//organic substance metabolic process;GO:0006139//nucleobase-containing compound metabolic process;GO:0014070//response to organic cyclic compound;GO:0032502//developmental process;GO:0019752//carboxylic acid metabolic process;GO:0044710//single-organism metabolic process;GO:0042221//response to chemical;GO:0009059//macromolecule biosynthetic process;GO:0009725//response to hormone;GO:0…
Unigene0033759	433	366.6666667	4.6442	6.45	5.6121	4.5197	4.2101	4.0729	5.568766667	4.267566667	-0.383944154	0.252352605	0.811849343	no	STOP1	PREDICTED: protein SENSITIVE TO PROTON RHIZOTOXICITY 1-like [Cucumis sativus]	-	-	-	-	-	-	-
Unigene0033779	8.333333333	6	0.7029	0.2049	0	0.2727	0.1267	0.198	0.3026	0.199133333	-0.603677251	0.67323911	0.992173575	no	MYB86	R2R3-MYB transcription factor MYB8, partial [Picea glauca]	-	-	-	-	-	-	-
Unigene0034363	2.333333333	2.333333333	0	0.1858	0.5265	0.4636	0	0.1795	0.237433333	0.214366667	-0.147441901	1	1	no	LBD40	PREDICTED: LOB domain-containing protein 42 [Jatropha curcas]	-	-	-	-	-	-	-
Unigene0035429	25.66666667	0	0.9004	0.8313	0.5338	0	0	0	0.755166667	0.001	-9.560651275	2.46E-07	1.74E-05	yes	ace1(C2H2)	--	-	-	-	-	-	-	-
Unigene0035481	0.333333333	3	0.0731	0	0	0.1347	0.1252	0.3262	0.024366667	0.195366667	3.003203526	0.233447861	0.795703908	no	--	PREDICTED: probable WRKY transcription factor 53 [Amborella trichopoda]	-	-	-	-	-	-	-
Unigene0035777	29.66666667	31	0.4372	0.9024	0.915	1.0189	0.3082	0.826	0.751533333	0.7177	-0.066456174	0.922551202	1	no	GGM13	MADS-box transcription factor GbMADS10 [Ginkgo biloba]	-	-	-	-	-	-	-
Unigene0036264	19.33333333	9	0.6716	0.5856	0.8979	0.5844	0.0958	0.233	0.718366667	0.3044	-1.238752049	0.153046098	0.693628128	no	--	PREDICTED: trihelix transcription factor GT-2 [Amborella trichopoda]	-	-	-	-	-	-	-
Unigene0036265	1113	902.6666667	20.3693	25.0459	17.186	13.8804	15.9427	16.1895	20.86706667	15.33753333	-0.444161332	0.151109981	0.690722179	no	GTL1	PREDICTED: trihelix transcription factor GTL1-like [Nelumbo nucifera]	-	-	-	-	-	-	-
Unigene0036266	0	2	0	0	0	0	0	0.1835	0.001	0.061166667	5.934673752	0.410030661	0.890761785	no	--	PREDICTED: trihelix transcription factor GTL1-like [Nelumbo nucifera]	-	-	-	-	-	-	-
Unigene0036326	1.666666667	5.666666667	0.2447	0.0753	0.0853	0.3006	0.5584	0.3638	0.1351	0.4076	1.593126377	0.271619465	0.819400962	no	SCRM	PREDICTED: transcription factor ICE1-like isoform X2 [Gossypium hirsutum]	-	-	-	-	-	-	-
Unigene0037434	1.666666667	7	0.0659	0.2433	0	0.607	0.3947	0.2351	0.103066667	0.412266667	2	0.205453269	0.765156607	no	SCL18	Transcription factor GRAS [Corchorus capsularis]	-	-	-	-	-	-	-
Unigene0037678	1	5.666666667	0	0	0.1133	0.1995	0.278	0.0644	0.037766667	0.180633333	2.257878786	0.229457597	0.790606514	no	ODO1	R2R3-MYB transcription factor MYB1, partial [Picea glauca]	-	-	-	-	GO:0044424//intracellular part;GO:0043226//organelle;GO:0044464//cell part;GO:0005623//cell;GO:0043227//membrane-bounded organelle;GO:0043231//intracellular membrane-bounded organelle;GO:0005622//intracellular;GO:0043229//intracellular organelle	GO:0005488//binding	GO:0050896//response to stimulus;GO:0044087//regulation of cellular component biogenesis;GO:0065007//biological regulation;GO:0050789//regulation of biological process;GO:0001101//response to acid chemical;GO:0042221//response to chemical
Unigene0037679	0.333333333	1	0	0	0.044	0.0774	0.036	0	0.014666667	0.0378	1.365845211	0.791330567	1	no	ODO1	R2R3 transcription factor [Cunninghamia lanceolata]	-	-	-	-	-	-	-
Unigene0038203	6.666666667	3.333333333	0.9192	0.1697	0.1282	0	0.2623	0.2733	0.4057	0.178533333	-1.184219843	0.444346643	0.909323924	no	BRG1	GATA type zinc finger transcription factor family protein [Medicago truncatula]	-	-	-	-	-	GO:0005488//binding	GO:0016070//RNA metabolic process;GO:0006807//nitrogen compound metabolic process;GO:0018130//heterocycle biosynthetic process;GO:0006351//transcription, DNA-templated;GO:0032774//RNA biosynthetic process;GO:0006139//nucleobase-containing compound metabolic process;GO:0009987//cellular process;GO:0044238//primary metabolic process;GO:0044249//cellular biosynthetic process;GO:0009059//macromolecul…
Unigene0038261	3604.666667	3031	46.9743	49.6552	126.5725	70.3645	52.2605	43.7143	74.40066667	55.44643333	-0.424220889	0.267073874	0.813455826	no	BHLH35	FIT1 [Marchantia polymorpha]	-	-	-	-	-	-	-
Unigene0038359	14.66666667	14	0.8826	1.397	0.3958	1.1616	0.9712	0.225	0.8918	0.785933333	-0.182313258	0.876811654	1	no	WRKY50	WRKY DNA-binding protein 50 [Arabidopsis thaliana]	-	-	-	-	-	GO:0005488//binding;GO:0001071//nucleic acid binding transcription factor activity;GO:0003677//DNA binding;GO:1901363//heterocyclic compound binding;GO:0003676//nucleic acid binding;GO:0097159//organic cyclic compound binding	GO:0044237//cellular metabolic process;GO:0034645//cellular macromolecule biosynthetic process;GO:0044238//primary metabolic process;GO:0051704//multi-organism process;GO:0010467//gene expression;GO:0009059//macromolecule biosynthetic process;GO:0050896//response to stimulus;GO:0006139//nucleobase-containing compound metabolic process;GO:0070887//cellular response to chemical stimulus;GO:0023052/…
Unigene0038631	3.666666667	1.666666667	0.9539	0	0	0.0799	0	0.3094	0.317966667	0.129766667	-1.292955688	0.661634691	0.98893414	no	SPAC25B8.19c	Zinc finger protein C25B8.19c, partial [Anthurium amnicola]	-	-	-	-	-	-	-
Unigene0038682	2560.666667	2838.666667	20.7139	20.5975	21.0791	19.553	20.0793	22.6077	20.79683333	20.74666667	-0.003484311	0.989621505	1	no	HSFA1	PREDICTED: heat stress transcription factor A-1 [Amborella trichopoda]	-	-	-	-	-	-	-
Unigene0038691	43.66666667	28.66666667	0.4727	1.4365	0.577	0.635	0.472	0.4041	0.828733333	0.5037	-0.71834322	0.252859034	0.811849343	no	WIP5	PREDICTED: zinc finger protein WIP2-like [Nelumbo nucifera]	-	-	-	-	-	-	-
Unigene0038905	561.6666667	832.6666667	8.2372	5.4659	8.8007	10.2048	9.5491	10.0124	7.501266667	9.9221	0.403511267	0.223634545	0.781856785	no	--	PREDICTED: trihelix transcription factor ASR3 [Elaeis guineensis]	-	-	-	-	-	-	-
Unigene0039505	4.333333333	19	0.2259	0	0.1051	0.3931	0.3437	0.5374	0.110333333	0.424733333	1.94468862	0.067801265	0.482270465	no	--	PREDICTED: trihelix transcription factor ASR3-like [Ziziphus jujuba]	-	-	-	-	-	-	-
Unigene0040171	7	10.66666667	0.0542	0.6002	0.4534	0.549	0.4636	0.5316	0.369266667	0.514733333	0.479162174	0.700433627	0.995496164	no	MIF1	mini zinc finger 1 [Welwitschia mirabilis]	-	-	-	-	-	-	-
Unigene0040720	2.666666667	11.33333333	0.3076	0	0.1073	0.7084	0.4387	0.4115	0.1383	0.519533333	1.909415159	0.152058285	0.692057516	no	LBD29	PREDICTED: LOB domain-containing protein 29-like [Gossypium arboreum]	-	-	-	-	-	-	-
Unigene0041089	81.66666667	91.33333333	1.4616	1.3216	0.8356	1.3049	1.1091	1.2635	1.206266667	1.225833333	0.023213965	0.969094644	1	no	WOX4	HD transcription factor [Pinus sylvestris]	-	-	-	-	-	-	-
Unigene0041836	2.333333333	28	0.155	0	0.1217	0.9999	0.8957	1.0027	0.092233333	0.9661	3.388812385	0.000534131	0.015034896	yes	MYB4	PREDICTED: transcription repressor MYB5-like [Nelumbo nucifera]	-	-	-	-	-	GO:0005488//binding	-
Unigene0042462	93.66666667	90.66666667	1.5975	4.179	1.4207	2.5265	1.7547	2.1851	2.399066667	2.155433333	-0.154495307	0.766453405	1	no	NFYB3	TPA_inf: CCAAT-box binding factor HAP3-like protein [Physcomitrella patens]	-	-	-	-	GO:0005623//cell;GO:0044464//cell part;GO:0005622//intracellular	GO:0005488//binding	-
Unigene0043470	739	1092	9.7099	8.1896	10.9968	12.4754	12.8925	12.8287	9.6321	12.7322	0.402559449	0.185371414	0.738456092	no	SCL32	PREDICTED: scarecrow-like protein 32 [Vitis vinifera]	-	-	-	-	-	-	-
Unigene0044150	24	15	1.0164	0.5722	0.1556	0.3426	0.5516	0.0885	0.5814	0.327566667	-0.827742516	0.353375988	0.855857592	no	ARR2	type B response regulator [Selaginella moellendorffii]	Environmental Information Processing	Signal transduction	ko04075//Plant hormone signal transduction	K14491	-	GO:0005488//binding	GO:0044699//single-organism process;GO:0023052//signaling;GO:0051716//cellular response to stimulus;GO:0050789//regulation of biological process;GO:0007165//signal transduction;GO:0050794//regulation of cellular process;GO:0050896//response to stimulus;GO:0044763//single-organism cellular process;GO:0007154//cell communication;GO:0009987//cellular process;GO:0065007//biological regulation;GO:0044…
Unigene0044439	1097.666667	1020	6.7576	9.6009	8.6282	6.5028	7.9031	6.5236	8.3289	6.9765	-0.25562253	0.406368604	0.889354581	no	CPRF2	PREDICTED: light-inducible protein CPRF2 isoform X1 [Amborella trichopoda]	-	-	-	-	-	-	-
Unigene0045375	1	0.666666667	0	0.2186	0	0	0	0.1408	0.072866667	0.046933333	-0.634646067	1	1	no	ETC1	PREDICTED: transcription factor CPC-like [Gossypium arboreum]	-	-	-	-	GO:0043229//intracellular organelle;GO:0044464//cell part;GO:0043231//intracellular membrane-bounded organelle;GO:0043227//membrane-bounded organelle;GO:0005623//cell;GO:0005622//intracellular;GO:0043226//organelle;GO:0044424//intracellular part	GO:0001071//nucleic acid binding transcription factor activity	GO:0034641//cellular nitrogen compound metabolic process;GO:0044260//cellular macromolecule metabolic process;GO:0044699//single-organism process;GO:0006807//nitrogen compound metabolic process;GO:0009888//tissue development;GO:0044763//single-organism cellular process;GO:0046483//heterocycle metabolic process;GO:0010467//gene expression;GO:0008152//metabolic process;GO:0009059//macromolecule bio…
Unigene0045376	20.66666667	22.66666667	0.6856	2.4265	0.2391	1.0527	0.8802	1.529	1.117066667	1.153966667	0.046886262	0.978259173	1	no	ETC1	PREDICTED: MYB-like transcription factor ETC1 [Cicer arietinum]	-	-	-	-	-	-	-
Unigene0045646	3.666666667	4.666666667	0.131	0.2419	0.3426	0.2413	0.5045	0.0584	0.2385	0.268066667	0.168602569	1	1	no	MYB5	Transcription repressor [Morus notabilis]	-	-	-	-	-	-	-
Unigene0045873	76.33333333	98	1.5758	1.1316	1.2641	1.2905	1.9631	1.2964	1.323833333	1.516666667	0.196182542	0.661681374	0.988940412	no	RAD	radialis [Rhytidophyllum auriculatum]	-	-	-	-	GO:0043229//intracellular organelle;GO:0043227//membrane-bounded organelle;GO:0044464//cell part;GO:0005622//intracellular;GO:0044424//intracellular part;GO:0043231//intracellular membrane-bounded organelle;GO:0005623//cell;GO:0043226//organelle	GO:0005488//binding	-
Unigene0046217	42	66.66666667	1.0104	0.7663	0.4531	1.3962	0.8184	1.0139	0.743266667	1.076166667	0.533949712	0.311355526	0.838508349	no	BBX21	PREDICTED: B-box zinc finger protein 21 [Vitis vinifera]	-	-	-	-	-	-	-
Unigene0046224	51.33333333	157	0.3499	0.9421	0.9151	1.6116	2.408	2.0546	0.7357	2.024733333	1.460542414	0.002932369	0.059002126	no	HSF24	PREDICTED: heat stress transcription factor B-2c [Elaeis guineensis]	-	-	-	-	-	-	-
Unigene0046265	845.3333333	1226.333333	6.4577	8.371	6.6035	9.3445	9.1086	9.7163	7.144066667	9.3898	0.394348886	0.188464294	0.743306126	no	RL9	PREDICTED: transcription repressor KAN1-like [Ipomoea nil]	-	-	-	-	-	-	-
Unigene0046616	0	7.666666667	0	0	0	0.5303	0.1095	0.6847	0.001	0.4415	8.786269628	0.010992287	0.156834577	no	LBD3	PREDICTED: LOB domain-containing protein 4-like, partial [Oryza brachyantha]	-	-	-	-	-	-	GO:0009653//anatomical structure morphogenesis;GO:0010087//phloem or xylem histogenesis;GO:0009987//cellular process;GO:0043170//macromolecule metabolic process;GO:0008152//metabolic process;GO:0044237//cellular metabolic process;GO:0009888//tissue development;GO:0071704//organic substance metabolic process;GO:0032502//developmental process;GO:0044260//cellular macromolecule metabolic process;GO:…
Unigene0046962	3.333333333	5.333333333	0.7313	0.075	0	0.9732	0.1391	0.0725	0.268766667	0.394933333	0.555254919	0.798749324	1	no	Os01g0723500	PREDICTED: B3 domain-containing protein Os01g0723500 [Amborella trichopoda]	-	-	-	-	-	-	-
Unigene0047454	145.3333333	129.6666667	3.3189	5.4526	1.4809	2.8328	3.4046	2.177	3.417466667	2.8048	-0.285029365	0.573214687	0.961440691	no	LBD4	PREDICTED: LOB domain-containing protein 4 [Amborella trichopoda]	-	-	-	-	-	-	-
Unigene0047528	11	19.33333333	0.1475	0.9873	0	0.6115	0.3156	0.9868	0.378266667	0.637966667	0.754077396	0.531918968	0.947358999	no	MYB308	Transcription repressor MYB4 [Cajanus cajan]	-	-	-	-	-	-	-
Unigene0047680	396.3333333	373.6666667	8.9959	9.344	8.548	8.6472	6.7567	7.5335	8.962633333	7.6458	-0.229255214	0.489474996	0.930820562	no	POLE3	PREDICTED: DNA polymerase epsilon subunit 3 [Nelumbo nucifera]	Genetic Information Processing;Metabolism	Nucleotide metabolism;Global and Overview;Replication and repair	ko01100//Metabolic pathways;ko00230//Purine metabolism;ko00240//Pyrimidine metabolism;ko03030//DNA replication;ko03420//Nucleotide excision repair;ko03410//Base excision repair	K02326	-	-	-
Unigene0047681	23.33333333	69.33333333	0.2885	0.4528	0.2415	1.3289	0.5679	0.7978	0.3276	0.8982	1.455101365	0.011615498	0.163086188	no	Pole3	PREDICTED: DNA polymerase epsilon subunit 3 [Amborella trichopoda]	Metabolism;Genetic Information Processing	Replication and repair;Global and Overview;Nucleotide metabolism	ko01100//Metabolic pathways;ko00230//Purine metabolism;ko00240//Pyrimidine metabolism;ko03030//DNA replication;ko03420//Nucleotide excision repair;ko03410//Base excision repair	K02326	GO:0044464//cell part;GO:0005622//intracellular;GO:0043226//organelle;GO:0044424//intracellular part;GO:0043227//membrane-bounded organelle;GO:0005623//cell;GO:0043231//intracellular membrane-bounded organelle;GO:0043229//intracellular organelle	GO:0005488//binding;GO:0046983//protein dimerization activity;GO:0097159//organic cyclic compound binding;GO:0005515//protein binding;GO:1901363//heterocyclic compound binding;GO:0003676//nucleic acid binding;GO:0003677//DNA binding	-
Unigene0048318	1012.333333	973	11.6494	9.3088	13.8765	12.4839	9.3985	8.1202	11.61156667	10.00086667	-0.21543761	0.511582037	0.938591836	no	DRAP1	PREDICTED: dr1-associated corepressor isoform X2 [Amborella trichopoda]	-	-	-	-	-	-	-
Unigene0048396	5	3.666666667	0.9708	0.2689	0.2031	0	0.1662	0.7794	0.480933333	0.3152	-0.609569388	0.713292028	0.99834121	no	PHL1	PREDICTED: myb family transcription factor PHL7-like [Juglans regia]	-	-	-	-	-	GO:0005488//binding	-
Unigene0048416	6.666666667	17.33333333	0.0249	0.2756	0.1822	0.1833	0.5961	0.355	0.1609	0.378133333	1.232730706	0.23012846	0.791900861	no	FEZ	PREDICTED: protein FEZ-like [Phoenix dactylifera]	-	-	-	-	-	-	-
Unigene0048641	54	47	2.0427	2.3387	2.1373	1.5432	2.098	1.4578	2.1729	1.699666667	-0.354369944	0.469285723	0.924236072	no	CPC	PREDICTED: transcription factor MYB59-like [Elaeis guineensis]	-	-	-	-	-	-	-
Unigene0048750	5.333333333	0.666666667	0.4832	0.8923	0.1011	0	0.1654	0	0.4922	0.055133333	-3.158247924	0.160745418	0.703113126	no	LOB	PREDICTED: protein LATERAL ORGAN BOUNDARIES [Amborella trichopoda]	-	-	-	-	-	-	-
Unigene0048958	0.333333333	3.666666667	0	0	0.0969	0.7675	0.1585	0	0.0323	0.308666667	3.256443623	0.286807883	0.833923893	no	NAC105	PREDICTED: NAC domain-containing protein 37-like [Gossypium hirsutum]	-	-	-	-	-	-	GO:0009058//biosynthetic process;GO:0016070//RNA metabolic process;GO:1901360//organic cyclic compound metabolic process;GO:0018130//heterocycle biosynthetic process;GO:0010243//response to organonitrogen compound;GO:1901362//organic cyclic compound biosynthetic process;GO:0044238//primary metabolic process;GO:0044271//cellular nitrogen compound biosynthetic process;GO:0071704//organic substance …
Unigene0049518	16.66666667	30.33333333	0.3652	0.6262	0.2729	0.721	0.5582	0.8378	0.421433333	0.705666667	0.743682435	0.268645648	0.815738793	no	MYB5	R2R3-MYB transcription factor [Prunus avium]	-	-	-	-	-	-	-
Unigene0049519	2.666666667	0	0.5043	0	0	0	0	0	0.1681	0.001	-7.393175914	0.308588558	0.838508349	no	TT2	anthocyanin related Myb1 [Phalaenopsis schilleriana]	-	-	-	-	-	GO:0005488//binding	-
Unigene0049546	3.666666667	1	0.1976	0.6387	0.2068	0.091	0.1692	0	0.3477	0.086733333	-2.003184606	0.363299891	0.863871395	no	ERF086	PREDICTED: ethylene-responsive transcription factor ERF086-like [Lupinus angustifolius]	-	-	-	-	GO:0043227//membrane-bounded organelle;GO:0005623//cell;GO:0043231//intracellular membrane-bounded organelle;GO:0044464//cell part;GO:0043229//intracellular organelle;GO:0005622//intracellular;GO:0044424//intracellular part;GO:0043226//organelle	GO:0001071//nucleic acid binding transcription factor activity	GO:0016070//RNA metabolic process;GO:0090304//nucleic acid metabolic process;GO:0008152//metabolic process;GO:0044271//cellular nitrogen compound biosynthetic process;GO:0044260//cellular macromolecule metabolic process;GO:1901360//organic cyclic compound metabolic process;GO:0006807//nitrogen compound metabolic process;GO:0006725//cellular aromatic compound metabolic process;GO:0071704//organic …
Unigene0049547	4	10	0.0507	0.5146	0	0.4201	0.1735	0.7684	0.188433333	0.454	1.268638101	0.382657383	0.873887976	no	ERF087	PREDICTED: ethylene-responsive transcription factor LEP [Amborella trichopoda]	-	-	-	-	-	-	-
Unigene0049576	7.666666667	5.333333333	0	0.1375	1.0387	0.2744	0.2549	0.1771	0.392066667	0.235466667	-0.735576148	0.630630971	0.980339997	no	KAN2	PREDICTED: transcription repressor KAN1-like [Musa acuminata subsp. malaccensis] [Musa acuminata]	-	-	-	-	-	-	-
Unigene0049807	8	2	1.226	0.1192	0.2025	0	0.3314	0	0.5159	0.110466667	-2.223480345	0.198422466	0.755456168	no	ATHB-13	PREDICTED: homeobox-leucine zipper protein ATHB-6 [Vitis vinifera]	-	-	-	-	-	-	-
Unigene0049861	4.333333333	5.666666667	0	0.0647	0.8801	0.452	0.5999	0	0.314933333	0.350633333	0.15491669	0.956054749	1	no	BHLH25	PREDICTED: transcription factor bHLH25-like [Ziziphus jujuba]	-	-	-	-	-	GO:0005488//binding;GO:0005515//protein binding	-
Unigene0049884	0.666666667	1.333333333	0.0613	0	0	0	0.0525	0.0547	0.020433333	0.035733333	0.806345927	0.85706899	1	no	Os02g0161200	Zinc finger CCCH domain-containing protein 13 [Anthurium amnicola]	-	-	-	-	-	-	-
Unigene0049885	288	351	4.7736	2.2421	5.0091	4.7686	3.3255	4.9515	4.008266667	4.348533333	0.1175504	0.777226442	1	no	Os02g0161200	PREDICTED: zinc finger CCCH domain-containing protein 13 [Musa acuminata subsp. malaccensis] [Musa acuminata]	-	-	-	-	-	-	-
Unigene0050137	1088.333333	1171.333333	14.9816	21.226	14.659	15.5331	18.205	15.8924	16.95553333	16.5435	-0.035491676	0.909272156	1	no	ZHD1	PREDICTED: zinc-finger homeodomain protein 2 [Amborella trichopoda]	-	-	-	-	-	-	-
Unigene0050197	37.66666667	60	0.4115	0.6199	0.1473	0.5986	0.4449	0.6955	0.3929	0.579666667	0.561061359	0.351550361	0.854463032	no	LBD6	PREDICTED: LOB domain-containing protein 6 [Vitis vinifera]	-	-	-	-	-	-	-
Unigene0050441	0.333333333	24	0.03	0	0	0.5806	0.6165	0.7229	0.01	0.64	6	7.82E-06	0.000396254	yes	RAP2-7(ERF)	PREDICTED: ethylene-responsive transcription factor RAP2-7-like isoform X2 [Gossypium hirsutum]	-	-	-	-	-	-	-
Unigene0050781	42.66666667	53.66666667	0.4696	1.421	1.392	1.5622	0.8484	1.3497	1.0942	1.253433333	0.196008804	0.73944758	1	no	--	PREDICTED: nuclear transcription factor Y subunit C-1-like [Camelina sativa]	-	-	-	-	-	-	-
Unigene0051000	7	11	0.0476	0.8788	0	0.0877	0.2444	1.0613	0.3088	0.464466667	0.58890231	0.726332989	1	no	ODO1	PREDICTED: protein ODORANT1-like [Gossypium hirsutum]	-	-	-	-	-	-	-
Unigene0051048	4.666666667	6	0.4749	0.1754	0	0.6125	0	0.1694	0.216766667	0.260633333	0.265878684	0.914773643	1	no	GGM13	MADS-box transcription factor GbMADS5 [Ginkgo biloba]	-	-	-	-	GO:0044464//cell part;GO:0043226//organelle;GO:0043229//intracellular organelle;GO:0043227//membrane-bounded organelle;GO:0043231//intracellular membrane-bounded organelle;GO:0044424//intracellular part;GO:0005623//cell;GO:0005622//intracellular	GO:0005488//binding;GO:0001071//nucleic acid binding transcription factor activity;GO:0005515//protein binding;GO:0046983//protein dimerization activity	GO:0048731//system development;GO:0061458//reproductive system development;GO:0009793//embryo development ending in seed dormancy;GO:0090304//nucleic acid metabolic process;GO:1901576//organic substance biosynthetic process;GO:0006139//nucleobase-containing compound metabolic process;GO:0010033//response to organic substance;GO:0003006//developmental process involved in reproduction;GO:0009648//p…
Unigene0051049	2	0	0	0	0.3452	0	0	0	0.115066667	0.001	-6.846326154	0.369567588	0.868332686	no	GGM13	MADS-box transcription factor GbMADS5 [Ginkgo biloba]	-	-	-	-	GO:0043226//organelle;GO:0043229//intracellular organelle;GO:0044424//intracellular part;GO:0043227//membrane-bounded organelle;GO:0043231//intracellular membrane-bounded organelle;GO:0044464//cell part;GO:0005623//cell;GO:0005622//intracellular	GO:0005515//protein binding;GO:0001071//nucleic acid binding transcription factor activity;GO:0046983//protein dimerization activity;GO:0005488//binding	GO:0034645//cellular macromolecule biosynthetic process;GO:0010033//response to organic substance;GO:0034654//nucleobase-containing compound biosynthetic process;GO:0044707//single-multicellular organism process;GO:0048519//negative regulation of biological process;GO:0099402//plant organ development;GO:0090304//nucleic acid metabolic process;GO:0044271//cellular nitrogen compound biosynthetic pr…
Unigene0051050	1.666666667	0	0.1	0.0923	0.0523	0	0	0	0.081533333	0.001	-6.349318093	0.236157841	0.796008661	no	GGM13	MADS-box transcription factor GbMADS5 [Ginkgo biloba]	-	-	-	-	GO:0043231//intracellular membrane-bounded organelle;GO:0005623//cell;GO:0043226//organelle;GO:0044424//intracellular part;GO:0005622//intracellular;GO:0043227//membrane-bounded organelle;GO:0043229//intracellular organelle;GO:0044464//cell part	GO:0046983//protein dimerization activity;GO:0001071//nucleic acid binding transcription factor activity;GO:0005515//protein binding;GO:0005488//binding	GO:0009725//response to hormone;GO:0007275//multicellular organism development;GO:0048367//shoot system development;GO:0048519//negative regulation of biological process;GO:0008152//metabolic process;GO:0010033//response to organic substance;GO:0090567//reproductive shoot system development;GO:0048575//short-day photoperiodism, flowering;GO:0009058//biosynthetic process;GO:0009793//embryo develop…
Unigene0051333	5.666666667	1.666666667	0.1619	0.5232	0.6776	0	0.0693	0.2889	0.454233333	0.1194	-1.927630744	0.277769328	0.825317511	no	BZIP43	PREDICTED: basic leucine zipper 43 [Tarenaya hassleriana]	-	-	-	-	-	-	-
Unigene0051450	5.666666667	6	1.1441	0	0	0.372	0.4608	0.2401	0.381366667	0.357633333	-0.092697541	1	1	no	cys-3	Regulatory protein cys-3 [Anthurium amnicola]	-	-	-	-	-	-	-
Unigene0051503	42.66666667	24	1.7474	1.7029	0.5756	0.7453	0.8309	0.4907	1.341966667	0.688966667	-0.961842747	0.129044886	0.64797517	no	TINY	PREDICTED: ethylene-responsive transcription factor TINY-like [Brassica oleracea var. oleracea] [Brassica oleracea]	-	-	-	-	GO:0005623//cell;GO:0005622//intracellular;GO:0043231//intracellular membrane-bounded organelle;GO:0043226//organelle;GO:0044424//intracellular part;GO:0043227//membrane-bounded organelle;GO:0043229//intracellular organelle;GO:0044464//cell part	GO:0001071//nucleic acid binding transcription factor activity	GO:0044763//single-organism cellular process;GO:0016049//cell growth;GO:0044699//single-organism process;GO:0009987//cellular process;GO:0040007//growth
Unigene0051730	8.333333333	11	0.379	0.0778	0.6168	0.3104	0.1081	0.8264	0.357866667	0.414966667	0.213573282	0.855396848	1	no	OBF1	PREDICTED: bZIP transcription factor 11 [Vitis vinifera]	-	-	-	-	-	GO:1901363//heterocyclic compound binding;GO:0003676//nucleic acid binding;GO:0005488//binding;GO:0003677//DNA binding;GO:0097159//organic cyclic compound binding	GO:0034641//cellular nitrogen compound metabolic process;GO:0009058//biosynthetic process;GO:0010467//gene expression;GO:0009059//macromolecule biosynthetic process;GO:1901360//organic cyclic compound metabolic process;GO:1901576//organic substance biosynthetic process;GO:0046483//heterocycle metabolic process;GO:0006807//nitrogen compound metabolic process;GO:0090304//nucleic acid metabolic proc…
Unigene0051876	7.666666667	7.333333333	0.3582	0.2067	0.4685	0.495	0.1533	0.2396	0.344466667	0.295966667	-0.218929682	0.851294969	1	no	WER	PREDICTED: myb-related protein 308-like [Elaeis guineensis]	-	-	-	-	-	GO:0005488//binding	-
Unigene0052984	243	217	5.5129	8.6737	5.8564	7.748	4.1166	4.5414	6.681	5.468666667	-0.288874931	0.481526492	0.928914421	no	YAB5	YABBY transcription factor, partial [Podocarpus matudae var. reichei] [Podocarpus matudae]	-	-	-	-	-	-	-
Unigene0053116	14.66666667	34.66666667	0.2342	0.449	0.0754	0.8297	0.4008	0.4499	0.252866667	0.560133333	1.147393414	0.129717149	0.64913099	no	ZFP3	PREDICTED: protein LATE FLOWERING [Vigna angularis]	-	-	-	-	-	-	-
Unigene0053850	11	18.33333333	0.3306	0.1077	0.2035	0.448	0.2331	0.2776	0.213933333	0.319566667	0.578955643	0.475691694	0.92694355	no	ATHB-5	Homeobox-leucine zipper protein HAT5 [Glycine soja]	-	-	-	-	-	GO:0001071//nucleic acid binding transcription factor activity;GO:0003676//nucleic acid binding;GO:1901363//heterocyclic compound binding;GO:0005515//protein binding;GO:0097159//organic cyclic compound binding;GO:0003677//DNA binding;GO:0046983//protein dimerization activity;GO:0005488//binding	GO:0010033//response to organic substance;GO:0033993//response to lipid;GO:0071229//cellular response to acid chemical;GO:0044763//single-organism cellular process;GO:0034641//cellular nitrogen compound metabolic process;GO:0032774//RNA biosynthetic process;GO:0009719//response to endogenous stimulus;GO:0006139//nucleobase-containing compound metabolic process;GO:0071396//cellular response to lip…
Unigene0054115	10	1.666666667	0	1.5682	0.4443	0.326	0	0	0.670833333	0.108666667	-2.626044914	0.194100804	0.747558434	no	LBD40	LOB domain-containing protein 41-like [Cajanus cajan]	-	-	-	-	-	-	-
Unigene0054660	5.333333333	17.66666667	0	0.0657	0.5209	1.0483	0.1826	0.4758	0.195533333	0.5689	1.540760511	0.231675078	0.794122299	no	NFYC3	PREDICTED: nuclear transcription factor Y subunit C-2-like [Malus domestica]	-	-	-	-	-	-	-
Unigene0054742	40.66666667	73.33333333	1.1728	2.0383	0.8662	3.9089	1.0629	1.8771	1.3591	2.282966667	0.748258184	0.217019786	0.774263832	no	YAB2	YABBY transcription factor, partial [Podocarpus matudae var. reichei] [Podocarpus matudae]	-	-	-	-	-	-	-
Unigene0054843	10.66666667	13	0.2544	0.1044	0.562	0.6772	0	0.3279	0.306933333	0.335033333	0.126379307	0.945731662	1	no	ERF2	PREDICTED: pathogenesis-related genes transcriptional activator PTI5-like [Cicer arietinum]	-	-	-	-	-	-	-
Unigene0054859	23.33333333	17.33333333	0.7557	0.4186	0.5798	0.3713	0.3234	0.4719	0.5847	0.388866667	-0.588421018	0.386544671	0.87673517	no	ZAT2	EPF-type Cis2-His2 zinc finger transcription factor [Selaginella moellendorffii]	-	-	-	-	-	GO:0005488//binding;GO:0043167//ion binding;GO:0043169//cation binding	GO:0003006//developmental process involved in reproduction;GO:0022414//reproductive process;GO:0000003//reproduction;GO:0032502//developmental process
Unigene0054888	388	385	7.4532	10.829	8.3849	8.4809	9.1787	6.2943	8.889033333	7.984633333	-0.154800379	0.664092938	0.989558653	no	ERF010	PREDICTED: ethylene-responsive transcription factor RAP2-1-like [Arachis duranensis]	-	-	-	-	-	-	-
Unigene0055197	64.66666667	58	0.9809	0.5964	0.7259	0.6943	0.5324	0.6296	0.767733333	0.618766667	-0.311209808	0.509845456	0.938213941	no	NAC073	PREDICTED: NAC domain-containing protein 73-like isoform X2 [Vigna angularis]	-	-	-	-	-	-	GO:0010467//gene expression;GO:0018130//heterocycle biosynthetic process;GO:0044237//cellular metabolic process;GO:0034654//nucleobase-containing compound biosynthetic process;GO:0006725//cellular aromatic compound metabolic process;GO:1901576//organic substance biosynthetic process;GO:0008152//metabolic process;GO:0044249//cellular biosynthetic process;GO:0046483//heterocycle metabolic process;G…
Unigene0055204	2	6.333333333	0	0	0.3392	0.6472	0.185	0.0964	0.113066667	0.309533333	1.452921111	0.482503221	0.928950276	no	ARF14	PREDICTED: AP2/ERF and B3 domain-containing transcription factor RAV1 [Eucalyptus grandis]	-	-	-	-	-	-	-
Unigene0055343	46.33333333	28.66666667	1.2923	1.5999	1.1062	0.487	0.9552	0.786	1.3328	0.742733333	-0.843544074	0.13103809	0.652392835	no	MYB26	PREDICTED: myb-related protein 308-like [Populus euphratica]	-	-	-	-	-	-	-
Unigene0055401	0	3	0	0	0	0.1465	0.0907	0.1891	0.001	0.1421	7.150762744	0.09804895	0.575463973	no	WRKY50	WRKY6 transcription factor, partial [Triticum aestivum]	-	-	-	-	-	-	-
Unigene0055402	0	0	0	0	0	0	0	0	0.001	0.001	0	notest	notest	notest	WRKY50	PREDICTED: probable WRKY transcription factor 50 [Setaria italica]	-	-	-	-	-	-	GO:0065007//biological regulation;GO:0050896//response to stimulus;GO:0050789//regulation of biological process;GO:0050794//regulation of cellular process
Unigene0055403	0	0	0	0	0	0	0	0	0.001	0.001	0	notest	notest	notest	WRKY48	WRKY6 transcription factor, partial [Triticum aestivum]	-	-	-	-	-	-	-
Unigene0055961	3716.666667	3671.666667	43.2003	44.8607	40.3205	35.6323	39.4053	39.2772	42.79383333	38.10493333	-0.167425125	0.493954274	0.931806619	no	RVE6	PREDICTED: protein REVEILLE 6 isoform X2 [Nelumbo nucifera]	-	-	-	-	-	-	-
Unigene0056707	52	46	1.2848	0.8987	0.8147	0.825	0.5998	0.9725	0.9994	0.7991	-0.322686164	0.529153298	0.945824351	no	BZIP43	bZIP transcription factor family protein [Klebsormidium flaccidum]	-	-	-	-	GO:0043229//intracellular organelle;GO:0043227//membrane-bounded organelle;GO:0043231//intracellular membrane-bounded organelle;GO:0044424//intracellular part;GO:0043226//organelle;GO:0044464//cell part;GO:0005622//intracellular;GO:0005623//cell	GO:0046983//protein dimerization activity;GO:0097159//organic cyclic compound binding;GO:0005515//protein binding;GO:0003676//nucleic acid binding;GO:0003677//DNA binding;GO:0001071//nucleic acid binding transcription factor activity;GO:1901363//heterocyclic compound binding;GO:0005488//binding	GO:0018130//heterocycle biosynthetic process;GO:0044238//primary metabolic process;GO:0046483//heterocycle metabolic process;GO:0043170//macromolecule metabolic process;GO:1901576//organic substance biosynthetic process;GO:0044249//cellular biosynthetic process;GO:0008152//metabolic process;GO:1901362//organic cyclic compound biosynthetic process;GO:0009058//biosynthetic process;GO:0010467//gene …
Unigene0056791	2.333333333	2.333333333	0	0.3145	0.1426	0.2511	0	0.1823	0.152366667	0.144466667	-0.076810666	1	1	no	SCL28	PREDICTED: scarecrow-like protein 28 [Nelumbo nucifera]	-	-	-	-	-	-	-
Unigene0056792	7.666666667	5.333333333	0.9429	0	0.5262	0.2896	0.4842	0.1122	0.4897	0.295333333	-0.729553998	0.620419502	0.976381026	no	SCL3	SCL18, partial [Pinus radiata]	-	-	-	-	-	-	-
Unigene0056857	0.666666667	4.666666667	0	0.0278	0	0.111	0.0516	0.0269	0.009266667	0.063166667	2.76904106	0.218574231	0.776185925	no	BHLH63	PREDICTED: transcription factor bHLH63-like [Pyrus x bretschneideri]	-	-	-	-	-	-	-
Unigene0056858	1.333333333	0.666666667	0.0492	0	0.0171	0	0	0.0292	0.0221	0.009733333	-1.183040501	0.860852901	1	no	BHLH62	PREDICTED: transcription factor bHLH63-like [Pyrus x bretschneideri]	-	-	-	-	-	-	-
Unigene0057068	12.33333333	13.33333333	0.4884	0.5896	0.2751	0.9345	0.1608	0.2681	0.451033333	0.454466667	0.010940423	1	1	no	WIN1	ethylene-responsive-element-binding factor 1 [Petunia x hybrida]	-	-	-	-	-	-	-
Unigene0057396	10	11	0.1242	0.9555	0.0866	0.5339	0.4606	0.2216	0.388766667	0.405366667	0.060322935	1	1	no	--	unknown [Picea sitchensis]	-	-	-	-	-	-	-
Unigene0057432	32	33.33333333	0.502	0.8575	1.0243	1.0407	0.6445	0.5598	0.7946	0.748333333	-0.086547754	0.899994154	1	no	WRKY12	PREDICTED: probable WRKY transcription factor 12 isoform X2 [Elaeis guineensis]	-	-	-	-	-	GO:0097159//organic cyclic compound binding;GO:0003676//nucleic acid binding;GO:1901363//heterocyclic compound binding;GO:0003677//DNA binding;GO:0005488//binding	GO:0071704//organic substance metabolic process;GO:0090304//nucleic acid metabolic process;GO:0018130//heterocycle biosynthetic process;GO:0008152//metabolic process;GO:1901362//organic cyclic compound biosynthetic process;GO:0044238//primary metabolic process;GO:0097659//nucleic acid-templated transcription;GO:0009059//macromolecule biosynthetic process;GO:0006725//cellular aromatic compound met…
Unigene0057609	755.6666667	729.3333333	12.3809	14.6146	12.8606	10.2377	14.3888	9.9607	13.28536667	11.52906667	-0.204562321	0.527669451	0.945239395	no	LUX	PREDICTED: transcription factor PCL1-like [Solanum pennellii]	-	-	-	-	-	-	-
Unigene0057684	28.66666667	64.33333333	0.2752	0.3812	0.312	0.8981	0.5006	0.5831	0.3228	0.6606	1.033136391	0.049347058	0.409235388	no	TERF2	PREDICTED: sporulation-specific protein 15 [Amborella trichopoda]	-	-	-	-	-	-	-
Unigene0057893	97.66666667	119	1.3242	1.9773	1.3855	1.8676	2.2667	1.0354	1.562333333	1.723233333	0.141415768	0.764362151	1	no	NAC055	PREDICTED: NAC domain-containing protein 35 [Nelumbo nucifera]	-	-	-	-	-	-	-
Unigene0058028	17.66666667	96	0.4122	0.4151	0.1372	0.3625	2.261	2.1058	0.3215	1.576433333	2.293773518	0.001753064	0.039654317	yes	FEZ(NAC)	PREDICTED: NAC domain-containing protein 35 [Ipomoea nil]	-	-	-	-	-	-	-
Unigene0058064	0.666666667	2.333333333	0	0.1457	0	0	0.1351	0.352	0.048566667	0.162366667	1.741217106	0.599793511	0.971452371	no	JUB1	BnaA03g19960D [Brassica napus]	-	-	-	-	-	-	-
Unigene0058532	1685	2094.333333	14.5087	17.0875	17.1649	19.2844	18.2836	17.0678	16.2537	18.21193333	0.164115912	0.545523343	0.953420572	no	MKRN	PREDICTED: E3 ubiquitin-protein ligase makorin [Amborella trichopoda]	-	-	-	-	-	-	-
Unigene0058666	684.6666667	715.6666667	6.1403	8.8037	7.6789	6.8131	7.0774	7.4865	7.540966667	7.125666667	-0.081724476	0.798809145	1	no	HSF24	PREDICTED: heat shock factor protein HSF24 [Citrus sinensis]	-	-	-	-	-	-	-
Unigene0058667	5.666666667	9.666666667	0.1341	0	0.2005	0.3354	0.0656	0.1026	0.111533333	0.167866667	0.589840838	0.692174956	0.995496164	no	HSF24	PREDICTED: heat stress transcription factor B-2b [Amborella trichopoda]	-	-	-	-	-	-	-
Unigene0058830	37.33333333	12.33333333	0.8784	0.7517	0.7398	0.3356	0.11	0.2676	0.789966667	0.237733333	-1.732447577	0.008871146	0.134404094	no	BHLH95	transcription factor bHLH95 [Ananas comosus]	-	-	-	-	-	-	-
Unigene0058887	8.333333333	10.66666667	0	0.323	0.9412	0.4144	0.941	0.0446	0.4214	0.466666667	0.147202107	0.939020292	1	no	RL6	radialis [Rhytidophyllum rupincola]	-	-	-	-	GO:0043226//organelle;GO:0043227//membrane-bounded organelle;GO:0043231//intracellular membrane-bounded organelle;GO:0005622//intracellular;GO:0044464//cell part;GO:0044424//intracellular part;GO:0005623//cell;GO:0043229//intracellular organelle	GO:0005488//binding	-
Unigene0059597	4.666666667	95.33333333	0	0.3404	0.0643	1.104	3.1033	3.5359	0.1349	2.581066667	4.258005152	1.59E-06	9.58E-05	yes	LBD1	LOB domain-containing protein 11 [Glycine soja]	-	-	-	-	-	-	-
Unigene0059776	1.666666667	4	0	0	0.4449	0	0.5095	0.3793	0.1483	0.296266667	0.998377718	0.758027139	1	no	WRKY57	PREDICTED: probable WRKY transcription factor 75 [Citrus sinensis]	-	-	-	-	-	-	-
Unigene0059974	17	11.33333333	0.3144	0.6773	0.7676	0.5793	0.4784	0	0.586433333	0.352566667	-0.734071028	0.482622422	0.928950276	no	TT2	MYB-like protein [Taxus globosa]	-	-	-	-	-	-	-
Unigene0060043	2500	2331.333333	19.644	21.9268	19.1504	14.8843	18.728	17.3914	20.2404	17.00123333	-0.251598393	0.34059277	0.854463032	no	IDD2	PREDICTED: protein indeterminate-domain 2 [Amborella trichopoda]	-	-	-	-	-	-	-
Unigene0060138	5.333333333	7	0	0.2798	0.6975	0.4467	0.415	0.2703	0.325766667	0.377333333	0.212000561	0.902357415	1	no	RAP2-11	PREDICTED: ethylene-responsive transcription factor RAP2-11 [Theobroma cacao]	-	-	-	-	-	-	-
Unigene0060168	80.33333333	71.66666667	0.7813	0.8578	0.8727	0.9046	0.488	0.6404	0.837266667	0.677666667	-0.30511138	0.497760692	0.932260467	no	DOF2.4	Dof1 [Pinus pinaster]	-	-	-	-	-	-	-
Unigene0060179	6.666666667	2	0.4651	0.501	0.5678	0.2857	0.0664	0.0692	0.5113	0.140433333	-1.864284611	0.195750781	0.750660237	no	CCMFC	cytochrome c biogenesis protein FC1 (mitochondrion) [Picea glauca]	-	-	-	-	GO:0044464//cell part;GO:0043229//intracellular organelle;GO:0043231//intracellular membrane-bounded organelle;GO:0043226//organelle;GO:0005623//cell;GO:0043227//membrane-bounded organelle;GO:0044424//intracellular part;GO:0005622//intracellular	-	GO:0070271//protein complex biogenesis;GO:0016043//cellular component organization;GO:0006461//protein complex assembly;GO:0034622//cellular macromolecular complex assembly;GO:0043933//macromolecular complex subunit organization;GO:0071840//cellular component organization or biogenesis;GO:0044085//cellular component biogenesis;GO:0009987//cellular process;GO:0022607//cellular component assembly;G…
Unigene0060278	21.66666667	45.33333333	0.1101	0.3387	0.7485	0.6253	0.8949	0.6873	0.3991	0.735833333	0.882628753	0.214250236	0.770371483	no	WRKY57	DNA-binding WRKY domain-containing protein [Musa acuminata]	-	-	-	-	-	-	-
Unigene0060385	95.33333333	72	2.423	3.0882	1.8463	1.6014	1.9611	1.4801	2.4525	1.680866667	-0.545047848	0.215591892	0.772546966	no	ROC3	LOW QUALITY PROTEIN: homeobox-leucine zipper protein ROC3-like [Asparagus officinalis]	-	-	-	-	-	-	-
Unigene0060580	2314	2239	34.3414	31.1141	37.2115	33.6181	28.0893	27.5989	34.22233333	29.76876667	-0.201138677	0.450451722	0.913212872	no	MADS50	TM3-like MADS-box transcription factor [Cryptomeria japonica]	-	-	-	-	-	-	-
Unigene0060611	7.333333333	0.666666667	0.0899	0.2906	0.0941	0.0414	0	0	0.1582	0.0138	-3.519009428	0.056024057	0.437954167	no	NAM-2	PREDICTED: NAC transcription factor 25 [Nicotiana sylvestris]	-	-	-	-	-	-	-
Unigene0060612	2.666666667	8	0.1466	0	0.0511	0.1801	0.0418	0.3051	0.0659	0.175666667	1.414490091	0.378725777	0.871562364	no	NAM-2	PREDICTED: NAC transcription factor 25 [Nicotiana sylvestris]	-	-	-	-	-	-	-
Unigene0060684	47.33333333	70	1.3581	0.9646	1.3663	1.6603	1.4083	1.8173	1.229666667	1.628633333	0.405394547	0.389742392	0.879571382	no	MIF3	mini zinc finger protein 2-like [Asparagus officinalis]	-	-	-	-	-	-	-
Unigene0060825	2948	3890.333333	25.9683	30.9267	26.9788	30.7	37.9671	31.0588	27.95793333	33.24196667	0.249748018	0.328185174	0.845285184	no	SCL3	PREDICTED: scarecrow-like protein 3 [Eucalyptus grandis]	-	-	-	-	-	-	-
Unigene0060837	6	10.66666667	0.2709	0.1786	0.2429	0.4634	0.0994	0.5523	0.2308	0.3717	0.687495464	0.522963688	0.942606157	no	TOE2	AP2-like ethylene-responsive transcription factor SNZ [Noccaea caerulescens]	-	-	-	-	-	-	-
Unigene0060892	1121	1395.333333	8.3998	8.6472	7.9674	10.1165	9.7278	8.2471	8.338133333	9.3638	0.167369678	0.560017447	0.957817393	no	SPL12	SPL2 [Pinus tabuliformis]	-	-	-	-	-	-	-
Unigene0060894	81.33333333	211	3.799	5.4805	1.9377	8.3998	8.9009	9.4042	3.739066667	8.901633333	1.251391882	0.005597198	0.095553683	no	GT-3A	PREDICTED: trihelix transcription factor GT-3b [Vitis vinifera]	-	-	-	-	GO:0043227//membrane-bounded organelle;GO:0043231//intracellular membrane-bounded organelle;GO:0043226//organelle;GO:0044464//cell part;GO:0005623//cell;GO:0044424//intracellular part;GO:0043229//intracellular organelle;GO:0005622//intracellular	GO:0001071//nucleic acid binding transcription factor activity	GO:0009058//biosynthetic process;GO:0044260//cellular macromolecule metabolic process;GO:0043170//macromolecule metabolic process;GO:0034641//cellular nitrogen compound metabolic process;GO:0097659//nucleic acid-templated transcription;GO:0034654//nucleobase-containing compound biosynthetic process;GO:0071704//organic substance metabolic process;GO:0006807//nitrogen compound metabolic process;GO:…
Unigene0061076	565	621.3333333	4.7539	6.3891	4.7835	4.8919	5.127	5.8567	5.308833333	5.291866667	-0.004618138	0.990356769	1	no	HBX4	PREDICTED: homeobox protein ceh-13-like [Nelumbo nucifera]	-	-	-	-	-	-	-
Unigene0061153	210.3333333	251.6666667	3.6923	5.3712	4.2226	5.0234	5.9529	3.3895	4.4287	4.7886	0.112720657	0.772554646	1	no	MYB44	R2R3-MYB transcription factor MYB9, partial [Picea glauca]	-	-	-	-	-	GO:0005488//binding	-
Unigene0061206	15	36.33333333	0.0384	0.2125	0.622	0.3357	0.6894	0.8212	0.290966667	0.615433333	1.080748699	0.210680886	0.767111202	no	NSP2	PREDICTED: nodulation-signaling pathway 2 protein-like [Gossypium hirsutum]	-	-	-	-	-	-	-
Unigene0061230	154	230.6666667	2.273	4.2337	2.3782	4.6615	3.9246	3.5968	2.961633333	4.060966667	0.455430147	0.261587227	0.812680844	no	ERF003	PREDICTED: ethylene-responsive transcription factor ERF003-like [Nelumbo nucifera]	-	-	-	-	-	-	-
Unigene0061231	47	40	1.3221	2.4083	1.1589	1.6459	1.2844	0.8925	1.629766667	1.274266667	-0.354998206	0.529178955	0.945824351	no	ERF003	PREDICTED: ethylene-responsive transcription factor ERF003 [Brassica oleracea var. oleracea] [Brassica oleracea]	-	-	-	-	-	-	-
Unigene0061243	0	8	0	0	0	0.1026	0.1144	0.2583	0.001	0.158433333	7.307732091	0.006690276	0.109614696	no	SLR1	Transcription factor GRAS [Corchorus capsularis]	-	-	-	-	-	-	-
Unigene0061244	0	13	0	0	0	0.1351	0.2134	0.157	0.001	0.1685	7.396604781	0.000382372	0.011422694	yes	SLR1(GRAS)	Protein SCARECROW [Glycine soja]	-	-	-	-	-	-	-
Unigene0061245	4.333333333	62.33333333	0.0258	0.1308	0	1.0201	0.6832	0.4479	0.0522	0.717066667	3.779985543	2.02E-05	0.00090635	yes	RGL2(GRAS)	PREDICTED: DELLA protein RGL1-like [Ziziphus jujuba]	-	-	-	-	-	-	-
Unigene0061663	234	282.6666667	2.7517	4.0924	3.4082	4.248	4.1501	2.8129	3.417433333	3.737	0.128967369	0.731746919	1	no	DOF5.3	Dof9 [Pinus pinaster]	-	-	-	-	-	-	-
Unigene0061834	39.66666667	79.33333333	1.513	0.6985	1.3931	2.5648	1.6576	2.2135	1.201533333	2.1453	0.836302736	0.100072448	0.580420197	no	znf511	PREDICTED: zinc finger protein 511 [Vitis vinifera]	-	-	-	-	-	-	-
Unigene0061835	618.3333333	577.6666667	13.1799	14.124	10.1112	10.8354	11.562	9.2443	12.4717	10.54723333	-0.241793518	0.461399041	0.921104097	no	znf511	PREDICTED: zinc finger protein 511 [Amborella trichopoda]	-	-	-	-	-	-	-
Unigene0061836	1	4	0.1018	0	0.0533	0.1876	0.3485	0	0.0517	0.1787	1.789303449	0.437322513	0.906387691	no	znf511	PREDICTED: zinc finger protein 511 [Vitis vinifera]	-	-	-	-	-	-	-
Unigene0061867	33	138.6666667	1.1641	1.0472	0.6871	3.5749	4.6241	2.7958	0.966133333	3.664933333	1.923492745	4.90E-05	0.00196864	yes	LBD1	PREDICTED: LOB domain-containing protein 1 [Solanum pennellii]	-	-	-	-	-	-	-
Unigene0061872	30	7.333333333	2.1824	1.0605	1.9229	0.4233	0.3932	0.3074	1.721933333	0.374633333	-2.200478113	0.00322852	0.063338361	no	CPC	PREDICTED: MYB-like transcription factor ETC1 [Sesamum indicum]	-	-	-	-	-	-	-
Unigene0061956	965.3333333	1316.333333	12.4455	10.7746	12.6683	12.8486	13.0071	18.0645	11.9628	14.64006667	0.291367019	0.341580365	0.854463032	no	DIVARICATA	PREDICTED: transcription factor MYB1R1 [Cicer arietinum]	-	-	-	-	-	-	-
Unigene0061961	636	1275.333333	7.7858	12.9108	8.0011	15.6385	18.4078	18.2918	9.5659	17.44603333	0.866926436	0.009412454	0.140627288	no	WRKY11	WRKY11 transcription factor [Ginkgo biloba]	-	-	-	-	-	-	-
Unigene0061982	2486.333333	3117	17.1935	17.69	15.2531	20.1366	17.4682	19.2541	16.7122	18.95296667	0.181522025	0.477655995	0.928164746	no	SPL12	SPL3 [Pinus tabuliformis]	-	-	-	-	-	-	-
Unigene0062058	596.3333333	789.3333333	6.3838	10.5445	6.5806	8.9087	11.8612	7.4607	7.8363	9.4102	0.264052756	0.463367399	0.922140361	no	CDF2	Dof domain zinc finger DNA-binding protein [Picea abies]	-	-	-	-	-	-	-
Unigene0062093	101	150.3333333	0.5614	0.743	0.5482	1.0287	0.4218	1.074	0.617533333	0.8415	0.446446259	0.336094366	0.850738201	no	SCL28	PREDICTED: scarecrow-like protein 28 [Amborella trichopoda]	-	-	-	-	-	-	-
Unigene0062173	1498	1625.666667	15.2792	19.8674	18.0241	18.1743	17.6867	16.2679	17.72356667	17.3763	-0.028548043	0.920015803	1	no	At4g13040	PREDICTED: ethylene-responsive transcription factor-like protein At4g13040 isoform X2 [Nelumbo nucifera]	-	-	-	-	-	-	-
Unigene0062263	9.666666667	18.33333333	0.2704	0.593	0.0707	0.6229	0.3472	0.6936	0.311366667	0.554566667	0.832746398	0.395952225	0.883427514	no	MYB3	MYB-like protein [Taxus globosa]	-	-	-	-	-	-	-
Unigene0062331	769	564.6666667	11.2514	20.9364	16.8304	10.6054	12.209	9.7661	16.3394	10.86016667	-0.589308763	0.092626686	0.559918666	no	NFYC2	PREDICTED: nuclear transcription factor Y subunit C-2 [Brassica napus]	-	-	-	-	-	-	-
Unigene0062366	229.6666667	376	4.4924	3.7008	5.065	6.672	6.1983	6.5639	4.4194	6.478066667	0.5517128	0.107728363	0.601494956	no	DR1	PREDICTED: protein Dr1 homolog [Amborella trichopoda]	-	-	-	-	-	-	-
Unigene0062739	293.3333333	303.3333333	2.9647	2.6901	3.2624	2.6749	2.5025	3.1007	2.9724	2.759366667	-0.107291099	0.758336903	1	no	E2FA	PREDICTED: transcription factor E2FA-like [Nelumbo nucifera]	-	-	-	-	-	-	-
Unigene0062784	3.666666667	8.333333333	0.0416	0.3836	0	0.3828	0.3201	0.2224	0.141733333	0.308433333	1.121779594	0.448243184	0.911479087	no	MYB306	PREDICTED: myb-related protein 306-like isoform X1 [Lupinus angustifolius]	-	-	-	-	-	-	GO:0009725//response to hormone;GO:0009987//cellular process;GO:0042221//response to chemical;GO:0001101//response to acid chemical;GO:0050896//response to stimulus;GO:0010033//response to organic substance;GO:0009719//response to endogenous stimulus;GO:0044699//single-organism process;GO:0044763//single-organism cellular process
Unigene0062787	36.66666667	68	1.3686	1.3019	1.8659	2.9802	1.6683	2.9227	1.512133333	2.523733333	0.738974122	0.147720865	0.68356604	no	MYB306	PREDICTED: myb-related protein 306-like [Vigna radiata var. radiata] [Vigna radiata]	-	-	-	-	-	GO:0005488//binding	GO:0010033//response to organic substance;GO:1901698//response to nitrogen compound;GO:0050896//response to stimulus;GO:0010243//response to organonitrogen compound;GO:0001101//response to acid chemical;GO:0009719//response to endogenous stimulus;GO:0042221//response to chemical
Unigene0062794	11923.66667	8897	102.5012	126.0636	130.7437	74.8954	84.6894	81.4967	119.7695	80.3605	-0.575702119	0.014466248	0.18921806	no	COL4	CONSTANS-like protein [Picea abies]	-	-	-	-	-	-	-
Unigene0062909	832.3333333	985.6666667	11.8031	15.5459	13.5879	15.9884	14.8535	13.0125	13.64563333	14.61813333	0.099319742	0.747650184	1	no	SPL3	PREDICTED: squamosa promoter-binding-like protein 12 isoform X2 [Glycine max]	-	-	-	-	-	-	-
Unigene0063064	375	408.6666667	3.1295	5.019	3.7842	3.6813	3.8463	4.2696	3.977566667	3.9324	-0.016476033	0.964687617	1	no	WRKY57	PREDICTED: probable WRKY transcription factor 28 [Elaeis guineensis]	-	-	-	-	-	-	-
Unigene0063126	160.3333333	229	1.6997	2.6639	2.3911	2.7765	3.3007	2.6247	2.251566667	2.900633333	0.365438742	0.333003615	0.848570999	no	FAMA	PREDICTED: transcription factor bHLH94 [Amborella trichopoda]	-	-	-	-	-	-	-
Unigene0063130	168.3333333	229.3333333	2.195	1.79	1.5622	3.0488	2.098	1.6996	1.849066667	2.282133333	0.303585842	0.442680793	0.908582011	no	BHLH30	PREDICTED: transcription factor bHLH30-like [Nelumbo nucifera]	-	-	-	-	-	-	-
Unigene0063159	133.3333333	207	3.5735	4.1918	3.7696	4.7494	6.3928	4.9646	3.844966667	5.368933333	0.4816644	0.190130032	0.744659853	no	RAP2-3	PREDICTED: ethylene-responsive transcription factor RAP2-12-like [Ipomoea nil]	-	-	-	-	-	-	-
Unigene0063227	10	20.66666667	0.0565	0.6787	0.0592	0.8856	0.5081	0.1765	0.2648	0.5234	0.983010802	0.371824334	0.87003157	no	MYB44	PREDICTED: transcription factor MYB44-like [Nicotiana attenuata]	-	-	-	-	-	GO:0005488//binding	-
Unigene0063231	678	586.6666667	8.7986	9.5259	10.4953	7.6571	6.8928	7.8999	9.6066	7.483266667	-0.360357731	0.249159175	0.809437655	no	--	PREDICTED: basic leucine zipper 24-like isoform X2 [Gossypium hirsutum]	-	-	-	-	-	-	GO:0042221//response to chemical;GO:0009987//cellular process;GO:0010043//response to zinc ion;GO:0050896//response to stimulus;GO:1990267//response to transition metal nanoparticle;GO:0010038//response to metal ion;GO:0010035//response to inorganic substance
Unigene0063252	170.3333333	90.33333333	2.7044	2.2753	3.1477	1.3711	1.3148	1.1705	2.709133333	1.285466667	-1.075539199	0.005339809	0.092133082	no	WRKY49	PREDICTED: probable WRKY transcription factor 49 isoform X2 [Vigna angularis]	-	-	-	-	-	-	-
Unigene0063253	3.333333333	2	0.0331	0.0918	0.208	0	0.0567	0.1183	0.110966667	0.058333333	-0.927733948	0.680108696	0.994470692	no	WRKY49	PREDICTED: probable WRKY transcription factor 49 [Capsicum annuum]	-	-	-	-	-	-	-
Unigene0063288	5.666666667	11.33333333	0.0271	0.0876	0.1135	0.1249	0.1625	0.121	0.076066667	0.136133333	0.839684075	0.428315468	0.902918242	no	TGA21	ZIP2, partial [Pinus tabuliformis]	Environmental Information Processing	Signal transduction	ko04075//Plant hormone signal transduction	K14431	-	-	-
Unigene0063289	0.666666667	2.666666667	0	0	0.0336	0.1185	0	0	0.0112	0.0395	1.818353921	0.650109211	0.985645372	no	TGA21	ZIP2, partial [Pinus tabuliformis]	Environmental Information Processing	Signal transduction	ko04075//Plant hormone signal transduction	K14431	-	-	-
Unigene0063312	86.33333333	77.66666667	0.9469	0.8927	0.6988	0.6796	0.7422	0.6402	0.846133333	0.687333333	-0.299875094	0.483368186	0.928988107	no	NAC100	NAC-domain containing protein 2 [Picea abies]	-	-	-	-	-	-	GO:0044238//primary metabolic process;GO:0003006//developmental process involved in reproduction;GO:0006139//nucleobase-containing compound metabolic process;GO:2000027//regulation of organ morphogenesis;GO:0061458//reproductive system development;GO:0048507//meristem development;GO:0008152//metabolic process;GO:0051239//regulation of multicellular organismal process;GO:0034645//cellular macromol…
Unigene0063343	20.66666667	52.33333333	0.5173	0.4342	0.4921	1.3865	0.9862	0.923	0.4812	1.098566667	1.190913875	0.031015046	0.310146498	no	GAI1	PREDICTED: DELLA protein RGL1-like [Jatropha curcas]	-	-	-	-	-	-	-
Unigene0063654	1208.333333	1228.666667	13.9051	23.0487	21.0148	17.3054	18.8051	17.119	19.32286667	17.74316667	-0.123045629	0.694969048	0.995496164	no	SAP16	PREDICTED: LOW QUALITY PROTEIN: zinc finger AN1 and C2H2 domain-containing stress-associated protein 16-like [Phoenix dactylifera]	-	-	-	-	-	-	-
Unigene0063775	439.3333333	357.3333333	4.0083	6.1712	3.5135	3.2705	3.6952	3.1762	4.564333333	3.380633333	-0.433110607	0.23209009	0.794513913	no	TCP23	PREDICTED: transcription factor TCP8 [Amborella trichopoda]	-	-	-	-	-	-	-
Unigene0063778	255.6666667	192.3333333	4.2344	4.2931	3.5276	1.8843	2.5848	3.7061	4.018366667	2.725066667	-0.560317688	0.15231317	0.692239636	no	MYB39	R2R3-MYB transcription factor MYB11 [Picea glauca]	-	-	-	-	-	-	-
Unigene0064148	2026.333333	1484	30.3736	38.6364	23.052	19.8693	21.1261	20.3177	30.68733333	20.4377	-0.586410435	0.049498467	0.409651831	no	ERF4	ERF1 [Pinus tabuliformis]	-	-	-	-	GO:0005623//cell;GO:0044464//cell part;GO:0043226//organelle;GO:0044424//intracellular part;GO:0043231//intracellular membrane-bounded organelle;GO:0043229//intracellular organelle;GO:0043227//membrane-bounded organelle;GO:0005622//intracellular	GO:0003677//DNA binding;GO:0001071//nucleic acid binding transcription factor activity;GO:1901363//heterocyclic compound binding;GO:0005488//binding;GO:0003676//nucleic acid binding;GO:0097159//organic cyclic compound binding	GO:0043170//macromolecule metabolic process;GO:1901576//organic substance biosynthetic process;GO:0010467//gene expression;GO:0006351//transcription, DNA-templated;GO:1901362//organic cyclic compound biosynthetic process;GO:0009059//macromolecule biosynthetic process;GO:0090304//nucleic acid metabolic process;GO:0006139//nucleobase-containing compound metabolic process;GO:0016070//RNA metabolic p…
Unigene0064335	836.3333333	1313.333333	6.2353	9.0263	5.7006	9.7633	9.6046	10.598	6.9874	9.988633333	0.515531568	0.103307779	0.590251182	no	CRF2	PREDICTED: ethylene-responsive transcription factor CRF3 [Nelumbo nucifera]	-	-	-	-	GO:0043226//organelle;GO:0043227//membrane-bounded organelle;GO:0043231//intracellular membrane-bounded organelle;GO:0005622//intracellular;GO:0044464//cell part;GO:0005623//cell;GO:0043229//intracellular organelle;GO:0044424//intracellular part	GO:0001071//nucleic acid binding transcription factor activity	GO:0071704//organic substance metabolic process;GO:0032774//RNA biosynthetic process;GO:0034654//nucleobase-containing compound biosynthetic process;GO:0090304//nucleic acid metabolic process;GO:0044237//cellular metabolic process;GO:0009058//biosynthetic process;GO:0009059//macromolecule biosynthetic process;GO:0006139//nucleobase-containing compound metabolic process;GO:0016070//RNA metabolic p…
Unigene0064509	1753.333333	1775.333333	19.0572	30.7164	22.999	23.0363	23.7225	20.0875	24.25753333	22.2821	-0.122547648	0.680621009	0.994504065	no	ILR3	PREDICTED: transcription factor ILR3 [Amborella trichopoda]	-	-	-	-	-	-	-
Unigene0064535	63.33333333	147	0.6458	0.6752	0.4472	2.03	0.7072	1.0336	0.5894	1.256933333	1.092589167	0.029204611	0.299150769	no	BHLH62	PREDICTED: transcription factor bHLH78 [Amborella trichopoda]	-	-	-	-	-	-	-
Unigene0064555	1244.666667	1648.666667	13.9167	15.6748	14.3858	17.7668	17.1298	17.6937	14.6591	17.5301	0.258037694	0.352249228	0.854494371	no	GT-3B	PREDICTED: trihelix transcription factor GT-3b isoform X2 [Amborella trichopoda]	-	-	-	-	-	-	-
Unigene0064585	4057.666667	4687.666667	24.1226	16.6799	22.0735	19.417	22.5417	22.9238	20.95866667	21.6275	0.045319969	0.860618725	1	no	Os01g0871200	uncharacterized LOC100384828 [Zea mays]	-	-	-	-	-	-	-
Unigene0064670	259	338.3333333	3.6816	4.509	3.2545	3.9178	3.987	5.6568	3.815033333	4.520533333	0.24479733	0.50146608	0.934459357	no	LBD1	PREDICTED: LOB domain-containing protein 1-like isoform X2 [Nicotiana sylvestris]	-	-	-	-	-	-	-
Unigene0064728	400	395.6666667	4.5968	5.1746	4.7581	4.0084	4.029	4.9338	4.843166667	4.323733333	-0.163673103	0.621523565	0.976866205	no	ASIL2	PREDICTED: trihelix transcription factor ASIL2 [Amborella trichopoda]	-	-	-	-	-	-	-
Unigene0064869	8.333333333	20.33333333	0.1233	0.1422	0.5158	0.7949	0.5538	0.3298	0.260433333	0.5595	1.103224018	0.220249957	0.778308193	no	--	PREDICTED: DELLA protein RGL1-like [Juglans regia]	-	-	-	-	-	-	-
Unigene0064905	14.33333333	48	0.3885	0.3398	0.1284	0.5274	0.805	1.2768	0.285566667	0.869733333	1.60674554	0.017926179	0.218046216	no	WRKY42	transcription factor WRKY [Taxus wallichiana var. chinensis] [Taxus wallichiana]	-	-	-	-	-	-	-
Unigene0064956	3419.333333	3511.333333	25.0387	22.9798	24.063	20.271	22.8297	23.3822	24.02716667	22.16096667	-0.116645719	0.637158597	0.982346702	no	Os01g0917400	zf-CCCH domain-containing protein [Cephalotus follicularis]	-	-	-	-	-	-	-
Unigene0065062	3758.666667	3264.666667	35.6921	52.1861	47.2349	38.3031	33.9993	33.9039	45.0377	35.4021	-0.347298212	0.186822532	0.740977142	no	HAT7	homeobox-leucine zipper-like protein [Picea glauca]	-	-	-	-	-	-	-
Unigene0065081	34.33333333	158.6666667	0.1756	0.391	0.4863	0.7423	2.3516	1.2163	0.350966667	1.436733333	2.033386392	0.000428718	0.01250335	yes	BHLH	HLH domain-containing protein [Cephalotus follicularis]	-	-	-	-	-	-	-
Unigene0065102	756	825	4.9878	6.4471	4.2638	4.8689	5.4315	5.2446	5.2329	5.181666667	-0.014194479	0.965769367	1	no	RF2b	PREDICTED: probable serine/threonine-protein kinase mps1 [Nelumbo nucifera]	-	-	-	-	-	-	-
Unigene0065126	2488	2402	22.37	28.6111	18.9569	20.1945	21.3755	19.7246	23.31266667	20.43153333	-0.190316561	0.489783821	0.930973336	no	GTL1	PREDICTED: trihelix transcription factor GTL1-like [Nelumbo nucifera]	-	-	-	-	-	-	-
Unigene0065127	1085.333333	1099.666667	7.0541	6.3904	6.8917	5.4923	7.1455	5.8194	6.778733333	6.1524	-0.139866415	0.638027954	0.982856011	no	EIN3	Protein ETHYLENE INSENSITIVE 3 [Morus notabilis]	Environmental Information Processing	Signal transduction	ko04075//Plant hormone signal transduction	K14514	-	-	-
Unigene0065153	54	130	1.9358	1.4342	0.4001	2.0476	2.5568	3.6669	1.2567	2.7571	1.133511305	0.046760633	0.396240922	no	FEZ	PREDICTED: NAC domain-containing protein 35-like [Elaeis guineensis]	-	-	-	-	-	-	-
Unigene0065164	25.66666667	61	0.2423	0.3098	0.8971	0.9445	1.0848	0.9977	0.483066667	1.009	1.062631964	0.084524844	0.535250715	no	RAX3	PREDICTED: transcription factor RAX3 [Citrus sinensis]	-	-	-	-	-	-	-
Unigene0065181	1319	2014	16.7008	7.9805	7.2112	7.6255	10.8146	25.2538	10.63083333	14.56463333	0.45421469	0.322876881	0.840592484	no	WRKY41	WRKY family transcription factor [Medicago truncatula]	-	-	-	-	-	-	-
Unigene0065191	306.3333333	352	2.8185	3.2247	2.4003	2.7519	2.821	3.2159	2.8145	2.9296	0.057825048	0.868951302	1	no	NSP1	PREDICTED: nodulation-signaling pathway 1 protein [Prunus mume]	-	-	-	-	-	-	-
Unigene0065193	18.66666667	55.33333333	0.2078	0.5755	0.1449	0.5264	0.9485	1.0658	0.3094	0.8469	1.452718433	0.02938711	0.299890116	no	--	bHLH transcription factor [Eschscholzia californica]	-	-	-	-	-	-	-
Unigene0065209	752	794.3333333	4.9996	6.8928	6.96	6.3002	5.9545	5.7072	6.284133333	5.9873	-0.069808231	0.826032023	1	no	KAN1	PREDICTED: transcription repressor KAN1-like isoform X2 [Nelumbo nucifera]	-	-	-	-	-	-	-
Unigene0065274	6102.333333	7120.333333	55.5624	48.2706	52.0894	46.556	56.634	59.9644	51.97413333	54.3848	0.065409693	0.78549281	1	no	SCL9	SCARECROW-like protein 1 [Pinus radiata]	-	-	-	-	-	-	-
Unigene0065345	11.66666667	22.33333333	0.3012	0.4635	0.0788	0.7169	0.2578	0.5374	0.281166667	0.504033333	0.842093579	0.335059342	0.850094252	no	BAM7	PREDICTED: protein BZR1 homolog 1 [Amborella trichopoda]	-	-	-	-	-	-	-
Unigene0065384	1047.333333	1637	10.435	15.5564	11.3884	15.3214	18.0079	19.6142	12.45993333	17.64783333	0.502194722	0.100558066	0.582102427	no	NAC002	PREDICTED: NAC domain-containing protein 35-like [Phoenix dactylifera]	-	-	-	-	-	-	-
Unigene0065385	334.6666667	456.6666667	4.0737	2.8672	4.8924	6.2333	4.093	4.129	3.944433333	4.818433333	0.28874609	0.441564856	0.907865334	no	--	PREDICTED: homeobox-DDT domain protein RLT1 [Raphanus sativus]	-	-	-	-	-	-	-
Unigene0065455	1017.666667	925	12.2448	13.0067	15.1029	12.2404	12.1372	8.5526	13.45146667	10.97673333	-0.293314711	0.350776972	0.854463032	no	ZHD3	PREDICTED: zinc-finger homeodomain protein 4-like [Gossypium hirsutum]	-	-	-	-	-	-	-
Unigene0065567	3.333333333	8.333333333	0	0.4297	0.2087	0.5512	0.5121	0.4151	0.2128	0.4928	1.211504105	0.355494656	0.85786937	no	MADS6	truncated MADS-box transcription factor, partial [Pseudotsuga menziesii]	-	-	-	-	-	-	-
Unigene0065569	82.66666667	132	0.7732	2.7216	2.3764	3.94	1.7164	2.9313	1.957066667	2.862566667	0.548616391	0.311434569	0.838508349	no	MADS6	AGL6 [Taxus baccata]	-	-	-	-	-	-	-
Unigene0065720	158.3333333	180.3333333	1.2992	2.2138	1.3815	1.6641	1.6725	1.7432	1.6315	1.693266667	0.053610209	0.893767681	1	no	DOF5.3	Dof2 [Pinus pinaster]	-	-	-	-	-	-	-
Unigene0065733	112.3333333	137.6666667	0.9293	1.131	0.7248	1.1908	0.9327	0.9872	0.928366667	1.0369	0.159510137	0.694813413	0.995496164	no	NAC073	PREDICTED: NAC domain-containing protein 8 isoform X3 [Vitis vinifera]	-	-	-	-	-	-	-
Unigene0065803	44.66666667	60.66666667	0.9506	1.2703	1.0731	1.1062	1.2632	1.6737	1.098	1.3477	0.295621332	0.56203908	0.958859323	no	ERF4	ERF12 [Taxus wallichiana var. chinensis] [Taxus wallichiana]	-	-	-	-	-	-	-
Unigene0066084	2268.333333	2131.666667	26.8597	27.6682	28.3482	23.0525	21.8277	25.2804	27.62536667	23.38686667	-0.240295029	0.358031869	0.85989689	no	KNAT3	CRKNOX3 [Ceratopteris richardii]	-	-	-	-	-	-	-
Unigene0066152	351.6666667	370.6666667	3.8308	6.1625	1.9795	5.1423	3.2284	3.3125	3.990933333	3.8944	-0.035325106	0.939094998	1	no	KN1	homeobox transcription factor SKN1 [Picea mariana]	-	-	-	-	-	-	-
Unigene0066335	938.6666667	941.6666667	8.4977	7.2289	9.1614	7.0246	7.6847	7.636	8.296	7.448433333	-0.155478886	0.60501303	0.971573836	no	ARR1	type B response regulator [Selaginella moellendorffii]	Environmental Information Processing	Signal transduction	ko04075//Plant hormone signal transduction	K14491	-	GO:0005488//binding	GO:0007154//cell communication;GO:0007165//signal transduction;GO:0050789//regulation of biological process;GO:0023052//signaling;GO:0044699//single-organism process;GO:0051716//cellular response to stimulus;GO:0009987//cellular process;GO:0044763//single-organism cellular process;GO:0050896//response to stimulus;GO:0050794//regulation of cellular process;GO:0044700//single organism signaling;GO:…
Unigene0066346	1667.333333	1645.666667	18.1189	20.6871	20.2733	17.0016	18.4596	17.039	19.6931	17.50006667	-0.170329814	0.533597943	0.948104961	no	PHL1	PREDICTED: myb family transcription factor PHL7 isoform X1 [Elaeis guineensis]	-	-	-	-	-	-	-
Unigene0066376	1299.666667	1518	19.0491	20.6432	20.061	21.7581	23.3918	17.672	19.91776667	20.94063333	0.072249186	0.801679016	1	no	ERF043	PREDICTED: ethylene-responsive transcription factor ERF043-like [Raphanus sativus]	-	-	-	-	GO:0005623//cell;GO:0043231//intracellular membrane-bounded organelle;GO:0043227//membrane-bounded organelle;GO:0044424//intracellular part;GO:0043226//organelle;GO:0044464//cell part;GO:0005622//intracellular;GO:0043229//intracellular organelle	GO:0001071//nucleic acid binding transcription factor activity	GO:0006351//transcription, DNA-templated;GO:0044238//primary metabolic process;GO:0009987//cellular process;GO:0044237//cellular metabolic process;GO:0034645//cellular macromolecule biosynthetic process;GO:0034654//nucleobase-containing compound biosynthetic process;GO:0009059//macromolecule biosynthetic process;GO:0034641//cellular nitrogen compound metabolic process;GO:0006725//cellular aromati…
Unigene0066443	77	52.66666667	0.5316	2.5485	1.4975	0.9042	0.875	1.0944	1.525866667	0.957866667	-0.671732148	0.250793225	0.811807611	no	ERF071	PREDICTED: ethylene-responsive transcription factor ERF071 [Daucus carota subsp. sativus] [Daucus carota]	-	-	-	-	-	-	GO:0019438//aromatic compound biosynthetic process;GO:0034654//nucleobase-containing compound biosynthetic process;GO:0009987//cellular process;GO:0032774//RNA biosynthetic process;GO:0090304//nucleic acid metabolic process;GO:0050794//regulation of cellular process;GO:0044237//cellular metabolic process;GO:0044249//cellular biosynthetic process;GO:0044260//cellular macromolecule metabolic proces…
Unigene0066572	18	20.66666667	0.1394	0.9227	0.1216	0.6423	0.2785	0.3732	0.394566667	0.431333333	0.12853413	0.907761892	1	no	AGL11	MADS-domain protein DAL10 [Picea abies]	-	-	-	-	-	-	GO:0044271//cellular nitrogen compound biosynthetic process;GO:0003006//developmental process involved in reproduction;GO:0048519//negative regulation of biological process;GO:0006725//cellular aromatic compound metabolic process;GO:0050789//regulation of biological process;GO:0048856//anatomical structure development;GO:0051239//regulation of multicellular organismal process;GO:0006807//nitrogen…
Unigene0066587	300.6666667	299.3333333	3.9308	2.2646	3.2134	2.6943	3.0772	2.5808	3.136266667	2.7841	-0.171837201	0.642216126	0.984281138	no	MYB44	PREDICTED: transcription factor GAMYB [Amborella trichopoda]	-	-	-	-	-	-	-
Unigene0066767	8	5.666666667	0.6003	0.3527	0.3426	0.4525	0.2803	0.0974	0.431866667	0.276733333	-0.642089536	0.588477454	0.96820276	no	SCR	GRAS family protein, partial [Selaginella moellendorffii]	-	-	-	-	-	-	-
Unigene0066818	240	318.3333333	4.2335	5.2968	4.4709	6.3972	5.0795	5.3648	4.667066667	5.613833333	0.266470157	0.44440274	0.909377403	no	ETC1	PREDICTED: MYB-like transcription factor ETC1 [Eucalyptus grandis]	-	-	-	-	-	GO:0005488//binding	-
Unigene0066867	36.66666667	68.33333333	0.4445	0.2443	0.4761	0.7898	0.3986	0.7553	0.3883	0.6479	0.738599451	0.165448019	0.707547346	no	NAC008	PREDICTED: NAC domain-containing protein 8 [Amborella trichopoda]	-	-	-	-	-	-	-
Unigene0066966	5594	5992.666667	34.6678	33.9039	30.7319	30.7385	32.9913	32.1414	33.1012	31.95706667	-0.05074853	0.828515724	1	no	ARF2	PREDICTED: auxin response factor 2-like [Nelumbo nucifera]	-	-	-	-	-	-	GO:0009987//cellular process
Unigene0067064	1476.666667	1313.333333	15.464	16.7953	16.8021	13.6781	12.5822	13.0839	16.3538	13.11473333	-0.318437429	0.252591511	0.811849343	no	BZIP17	bZIP transcription factor family protein [Populus trichocarpa]	-	-	-	-	-	-	-
Unigene0067096	967.3333333	555.3333333	10.2429	11.0654	6.9676	4.4386	6.935	3.2677	9.4253	4.880433333	-0.949529289	0.012234142	0.169133536	no	GATA9	PREDICTED: GATA transcription factor 5-like isoform X1 [Lupinus angustifolius]	-	-	-	-	-	-	-
Unigene0067146	28.66666667	32	0.8821	0.578	0.9825	1.704	0.1218	0.66	0.8142	0.8286	0.025292599	1	1	no	SCRM	PREDICTED: transcription factor MYC2-like [Daucus carota subsp. sativus] [Daucus carota]	-	-	-	-	-	-	-
Unigene0067256	327.3333333	332.3333333	3.3716	3.2001	2.5494	2.3057	3.0393	2.9992	3.040366667	2.7814	-0.128434085	0.714310534	0.998814458	no	ZAT5	PREDICTED: zinc finger protein ZAT9-like [Nelumbo nucifera]	-	-	-	-	-	-	-
Unigene0067540	390.6666667	290	5.7734	8.0196	6.0046	3.9535	5.3249	3.9972	6.5992	4.4252	-0.576548481	0.1038622	0.591838714	no	RAP2-9	ethylene-responsive transcription factor ERF018 [Medicago truncatula]	-	-	-	-	-	-	-
Unigene0067630	30	10.66666667	0.2878	0.2899	0.6023	0.2169	0.112	0.0467	0.393333333	0.1252	-1.651517891	0.036546054	0.342299186	no	DPBF3	PREDICTED: ABSCISIC ACID-INSENSITIVE 5-like protein 7 [Gossypium arboreum]	Environmental Information Processing	Signal transduction	ko04075//Plant hormone signal transduction	K14432	-	-	GO:0050896//response to stimulus
Unigene0067631	218	279	2.1432	1.8131	2.9273	2.9958	2.6928	2.1756	2.294533333	2.6214	0.192136746	0.608992833	0.97273906	no	DPBF3	PREDICTED: ABSCISIC ACID-INSENSITIVE 5-like protein 6 [Amborella trichopoda]	Environmental Information Processing	Signal transduction	ko04075//Plant hormone signal transduction	K14432	-	-	-
Unigene0067741	150.6666667	160.3333333	1.993	3.2059	1.6454	1.9796	2.2522	2.4168	2.281433333	2.2162	-0.041852414	0.919968103	1	no	ZAT5	PREDICTED: zinc finger protein ZAT4-like [Nelumbo nucifera]	-	-	-	-	-	-	-
Unigene0067760	1247.666667	1644	13.7211	10.0941	15.2556	16.9867	15.4309	13.5864	13.0236	15.33466667	0.235668512	0.432984448	0.904633792	no	E2FB	E2F-like protein [Pinus sylvestris]	-	-	-	-	-	-	-
Unigene0067775	227.6666667	245	1.9658	2.5639	1.8571	1.8375	2.0419	2.3495	2.128933333	2.0763	-0.036115863	0.922594076	1	no	BHLH112	PREDICTED: transcription factor bHLH123-like [Nelumbo nucifera]	-	-	-	-	-	-	-
Unigene0067795	1361.333333	1803.666667	20.7581	22.0005	12.7203	22.017	24.6519	20.0542	18.49296667	22.24103333	0.266247136	0.395399147	0.883427514	no	MYB44	R2R3-MYB transcription factor MYB6 [Picea glauca]	-	-	-	-	-	-	-
Unigene0067821	194	346.3333333	3.6373	7.6226	5.1346	9.1752	8.9192	8.5751	5.464833333	8.889833333	0.701978874	0.07228424	0.498132312	no	ERF018	PREDICTED: ethylene-responsive transcription factor ERF016 [Theobroma cacao]	-	-	-	-	-	-	-
Unigene0067848	208.3333333	244.6666667	1.6764	2.1235	1.1354	2.0891	1.9616	1.2354	1.6451	1.762033333	0.099065934	0.811567048	1	no	SHR	short-root [Pinus radiata]	-	-	-	-	-	-	-
Unigene0067869	251	274.3333333	1.0816	3.7913	2.1132	3.3246	1.8925	1.8358	2.3287	2.350966667	0.013729291	0.981863257	1	no	BAM7	PREDICTED: protein BZR1 homolog 1 [Amborella trichopoda]	-	-	-	-	-	-	-
Unigene0067876	21.66666667	13.66666667	0.7962	0.5173	0.5862	0.2717	0.4038	0.3946	0.633233333	0.3567	-0.828025985	0.249933163	0.810535935	no	CAL	DAL21, partial [Pinus tabuliformis]	-	-	-	-	-	-	-
Unigene0067877	6	4.333333333	0	0.0773	0.7009	0.1543	0	0.3361	0.2594	0.163466667	-0.666182001	0.70766802	0.996790001	no	MADS5	DAL21, partial [Pinus tabuliformis]	-	-	-	-	-	-	-
Unigene0068008	41	36	0.4915	0.8251	1.4259	0.5969	1.1855	0.3388	0.914166667	0.707066667	-0.370610967	0.574440841	0.96186177	no	BHLH	BnaC03g45410D [Brassica napus]	-	-	-	-	-	-	-
Unigene0068142	823.3333333	1225.666667	6.6949	7.8227	6.1147	8.9892	10.3898	8.3701	6.877433333	9.2497	0.427536325	0.158085023	0.700082859	no	RF2b	Transcription factor RF2b, partial [Anthurium amnicola]	-	-	-	-	-	-	-
Unigene0068402	2234.333333	2097	14.2623	15.5518	11.1902	11.0368	11.1073	12.7338	13.6681	11.62596667	-0.233462031	0.396718882	0.883553613	no	PDF2	homeobox 1 [Picea abies]	-	-	-	-	-	-	-
Unigene0068598	238.3333333	280.3333333	3.1973	2.3135	2.5149	2.58	3.1829	2.6904	2.675233333	2.817766667	0.074887421	0.837089161	1	no	PBF	Dof1 [Pinus pinaster]	-	-	-	-	-	-	-
Unigene0068685	28.66666667	45.33333333	1.0388	0.6394	0.4141	1.3216	0.9526	0.7281	0.697433333	1.000766667	0.520978419	0.384902674	0.875322631	no	BHLH55	PREDICTED: transcription factor bHLH118-like [Jatropha curcas]	-	-	-	-	-	-	-
Unigene0068762	219	648.3333333	3.4806	4.2221	4.3004	9.7223	10.3473	11.9242	4.001033333	10.6646	1.414385302	2.74E-05	0.001183345	yes	HAT5(HD-ZIP)	PREDICTED: homeobox-leucine zipper protein HAT5 [Beta vulgaris subsp. vulgaris] [Beta vulgaris]	-	-	-	-	GO:0043231//intracellular membrane-bounded organelle;GO:0043227//membrane-bounded organelle;GO:0005622//intracellular;GO:0044424//intracellular part;GO:0044464//cell part;GO:0005623//cell;GO:0043229//intracellular organelle;GO:0043226//organelle	GO:0097159//organic cyclic compound binding;GO:0001071//nucleic acid binding transcription factor activity;GO:0046983//protein dimerization activity;GO:0005515//protein binding;GO:0003677//DNA binding;GO:1901363//heterocyclic compound binding;GO:0003676//nucleic acid binding;GO:0005488//binding	GO:0097659//nucleic acid-templated transcription;GO:0043170//macromolecule metabolic process;GO:0044260//cellular macromolecule metabolic process;GO:0044271//cellular nitrogen compound biosynthetic process;GO:0016070//RNA metabolic process;GO:0034645//cellular macromolecule biosynthetic process;GO:0032774//RNA biosynthetic process;GO:0048731//system development;GO:0071704//organic substance metab…
Unigene0068806	331	412	2.1386	3.2517	1.8464	2.8038	2.8224	2.5881	2.412233333	2.7381	0.182805673	0.616211487	0.974762707	no	SCL1	PREDICTED: scarecrow-like protein 1 [Juglans regia]	-	-	-	-	-	-	-
Unigene0068837	798.6666667	695.6666667	7.2349	10.91	6.7783	6.577	7.1042	6.0642	8.307733333	6.5818	-0.33597272	0.313612254	0.838508349	no	GAI1	RGA [Pinus tabuliformis]	Environmental Information Processing	Signal transduction	ko04075//Plant hormone signal transduction	K14494	-	-	-
Unigene0068876	1355.666667	1548.333333	12.9447	13.8666	10.8608	13.3937	12.3945	13.179	12.55736667	12.98906667	0.048763813	0.864136828	1	no	--	PREDICTED: LOW QUALITY PROTEIN: mediator-associated protein 1 [Arachis ipaensis]	-	-	-	-	-	-	-
Unigene0068897	1.333333333	5.666666667	0.0686	0.0633	0	0.1895	0.2347	0.0917	0.043966667	0.171966667	1.967646882	0.233021028	0.795703908	no	LBD1	PREDICTED: LOB domain-containing protein 12-like isoform X2 [Gossypium raimondii]	-	-	-	-	-	-	-
Unigene0068898	24.33333333	31.66666667	0.6337	0.6053	0.3201	0.7851	0.3553	0.7212	0.5197	0.620533333	0.255829651	0.69892048	0.995496164	no	LBD1	PREDICTED: LOB domain-containing protein 1-like [Cucumis sativus]	-	-	-	-	-	-	-
Unigene0068899	3	20	0	0.2769	0.0897	0.5132	0.7335	1.0321	0.1222	0.7596	2.63599562	0.015771187	0.200494605	no	LBD1	BnaA07g13960D [Brassica napus]	-	-	-	-	-	-	-
Unigene0068900	2.333333333	8	0.1212	0.2798	0	0.4467	0.2075	0.6488	0.133666667	0.434333333	1.700162942	0.240424442	0.800378298	no	LBD1	Lateral organ boundaries domain family protein [Theobroma cacao]	-	-	-	-	-	-	-
Unigene0068954	640.3333333	787	4.348	3.0194	4.5492	4.8206	4.1212	4.1564	3.9722	4.366066667	0.136395895	0.677298695	0.993466516	no	MYB3R-1	transcription repressor MYB5 [Medicago truncatula]	-	-	-	-	-	-	-
Unigene0068960	17.33333333	23	0.3121	0.6915	0.5877	0.7188	0.4274	0.7795	0.530433333	0.6419	0.275177121	0.699093488	0.995496164	no	BEH4	PREDICTED: BES1/BZR1 homolog protein 4-like [Pyrus x bretschneideri]	-	-	-	-	-	-	-
Unigene0069140	33	44	0.7572	0.6641	0.4159	0.3837	0.8101	1.0132	0.6124	0.735666667	0.264577941	0.678807785	0.99411899	no	TCP2	PREDICTED: transcription factor TCP2 [Brassica oleracea var. oleracea] [Brassica oleracea]	-	-	-	-	-	-	-
Unigene0069307	60.66666667	53	1.0871	1.6241	0.7858	0.9833	0.9981	0.811	1.165666667	0.9308	-0.324612179	0.520873693	0.94164021	no	MYB21	PREDICTED: myb-related protein 305-like [Ipomoea nil]	-	-	-	-	-	-	GO:0044699//single-organism process
Unigene0069388	545.3333333	614.3333333	5.5044	8.6154	6.9111	6.5925	7.4145	7.4355	7.0103	7.1475	0.02796253	0.93528296	1	no	dnajc2	PREDICTED: dnaJ homolog subfamily C member 2 [Cucumis melo]	-	-	-	-	-	-	-
Unigene0069498	54	84.66666667	0.4222	1.2911	0.3313	1.2519	0.4516	1.3063	0.681533333	1.003266667	0.557848998	0.380219976	0.871693114	no	MUTE	transcription factor SPCH, partial [Picea breweriana]	-	-	-	-	-	-	-
Unigene0069511	84.66666667	93.33333333	1.0423	0.8	1.3402	1.2264	0.8706	1.0418	1.060833333	1.046266667	-0.019947409	0.980119451	1	no	--	PREDICTED: protein EFFECTOR OF TRANSCRIPTION 2-like [Daucus carota subsp. sativus] [Daucus carota]	-	-	-	-	-	-	-
Unigene0069563	150.6666667	148	2.7962	4.915	4.2196	4.5824	3.0605	3.022	3.976933333	3.554966667	-0.161820346	0.69841752	0.995496164	no	PTI5	PREDICTED: ethylene-responsive transcription factor ERF091 [Solanum tuberosum]	Environmental Information Processing	Signal transduction	ko04075//Plant hormone signal transduction	K14516	-	-	-
Unigene0069578	2829.666667	2567.666667	39.4904	45.1275	43.3339	37.0297	36.9788	30.6587	42.6506	34.88906667	-0.289791033	0.263139579	0.813234758	no	LOL3	PREDICTED: protein LSD1-like [Phoenix dactylifera]	-	-	-	-	-	-	GO:0071495//cellular response to endogenous stimulus;GO:0008152//metabolic process;GO:0031323//regulation of cellular metabolic process;GO:0043207//response to external biotic stimulus;GO:0065007//biological regulation;GO:0051707//response to other organism;GO:0048856//anatomical structure development;GO:0071310//cellular response to organic substance;GO:0071369//cellular response to ethylene sti…
Unigene0069596	460.3333333	519	4.4698	3.8087	4.4623	4.3667	5.1566	3.331	4.246933333	4.284766667	0.01279518	0.971950579	1	no	EMB1789	PREDICTED: zinc finger CCCH domain-containing protein 7 [Amborella trichopoda]	-	-	-	-	-	-	-
Unigene0069606	176	363.6666667	1.6223	2.2914	1.6412	4.088	3.6782	2.6644	1.851633333	3.476866667	0.908989303	0.015293055	0.196721837	no	MYB44	PREDICTED: myb-like protein AA [Amborella trichopoda]	-	-	-	-	-	-	-
Unigene0069639	72.33333333	59	2.2604	0.9821	2.5598	1.4945	1.8208	0.854	1.9341	1.389766667	-0.476819706	0.381382008	0.872598825	no	HOX11	PREDICTED: homeobox-leucine zipper protein HOX11-like [Cicer arietinum]	-	-	-	-	-	-	-
Unigene0069658	916.6666667	1094	9.514	10.3184	10.4445	10.1728	11.5986	10.7157	10.0923	10.82903333	0.101649468	0.729768045	1	no	DOF5.3	Dof6 [Pinus pinaster]	-	-	-	-	-	-	-
Unigene0069664	3804.666667	3932.666667	20.0906	17.6868	17.0302	14.9776	17.4825	18.4729	18.2692	16.97766667	-0.105775265	0.671932026	0.991800462	no	NLP7	PREDICTED: protein NLP6-like isoform X1 [Nelumbo nucifera]	-	-	-	-	-	-	-
Unigene0069707	15.33333333	19.33333333	1.1411	0.2039	0.3466	0.5765	0.8506	0.4597	0.563866667	0.628933333	0.157553041	0.865126833	1	no	NAC045	NAC domain containing protein 28 [Zea mays]	-	-	-	-	-	-	-
Unigene0069708	72.66666667	117.6666667	0.6486	0.6165	0.7984	1.2567	1.143	0.5956	0.687833333	0.998433333	0.537607068	0.239634051	0.799355921	no	NAC045	PREDICTED: NAC domain-containing protein 86-like isoform X2 [Elaeis guineensis]	-	-	-	-	-	-	-
Unigene0069713	306.6666667	209.6666667	2.6449	2.1538	2.302	2.3288	0.9415	1.1414	2.3669	1.470566667	-0.686626566	0.107398743	0.601183846	no	NAC098	cup-shaped cotyledon [Picea abies]	-	-	-	-	-	-	-
Unigene0069715	207	262.3333333	2.7552	2.0478	2.2249	2.8965	3.004	2.0907	2.342633333	2.663733333	0.185318499	0.615153901	0.97436987	no	AS1	PREDICTED: transcription factor AS1 [Jatropha curcas]	-	-	-	-	-	-	-
Unigene0069745	187.6666667	254	1.0121	1.9424	1.4341	1.2922	1.7188	2.3744	1.462866667	1.795133333	0.295292723	0.480041081	0.928914421	no	WRKY57	PREDICTED: probable WRKY transcription factor 28 [Phoenix dactylifera]	-	-	-	-	-	-	-
Unigene0069764	479	613	5.7443	4.7305	5.597	6.4878	6.9642	4.9732	5.357266667	6.141733333	0.197148763	0.551027453	0.954487118	no	BHLH95	transcription factor bHLH95 [Ananas comosus]	-	-	-	-	-	-	-
Unigene0069780	769.3333333	833	6.6246	5.6617	5.8342	6.974	5.4116	5.3143	6.040166667	5.899966667	-0.033881555	0.914758614	1	no	ARF18	PREDICTED: auxin response factor 18 isoform X1 [Amborella trichopoda]	-	-	-	-	-	-	-
Unigene0069817	1340.666667	1464	15.9687	15.1648	20.9634	17.3538	16.5124	17.0591	17.36563333	16.9751	-0.032814954	0.911078299	1	no	WHY1	Calpain-D, partial [Anthurium amnicola]	-	-	-	-	GO:0005623//cell;GO:0043231//intracellular membrane-bounded organelle;GO:0043226//organelle;GO:0005622//intracellular;GO:0044464//cell part;GO:0043227//membrane-bounded organelle;GO:0044424//intracellular part;GO:0009536//plastid;GO:0043232//intracellular non-membrane-bounded organelle;GO:0005694//chromosome;GO:0043228//non-membrane-bounded organelle;GO:0043229//intracellular organelle;GO:0005737…	GO:1901363//heterocyclic compound binding;GO:0003677//DNA binding;GO:0043565//sequence-specific DNA binding;GO:0005488//binding;GO:0097159//organic cyclic compound binding;GO:0043566//structure-specific DNA binding;GO:0003676//nucleic acid binding	GO:0009058//biosynthetic process;GO:0010833//telomere maintenance via telomere lengthening;GO:1901360//organic cyclic compound metabolic process;GO:0016043//cellular component organization;GO:0046483//heterocycle metabolic process;GO:0006139//nucleobase-containing compound metabolic process;GO:0006278//RNA-dependent DNA replication;GO:0007004//telomere maintenance via telomerase;GO:0044699//singl…
Unigene0069840	501.3333333	310	8.5767	12.0522	4.3612	3.5241	6.7093	3.8254	8.330033333	4.686266667	-0.829883217	0.064816297	0.47158078	no	ERF034	ethylene-responsive transcription factor TINY-like [Cajanus cajan]	-	-	-	-	-	-	-
Unigene0069857	8.333333333	8.333333333	0.5929	0.7299	1.1374	0.2731	0.5075	1.4105	0.820066667	0.730366667	-0.167120274	0.91052056	1	no	Os07g0631100	transcription elongation factor 1 [Zea mays]	-	-	-	-	-	-	-
Unigene0070000	2151.666667	1552	15.7709	23.5887	15.9418	11.0747	13.0556	12.0598	18.4338	12.06336667	-0.61172091	0.037646866	0.348578898	no	Os05g0195200	PREDICTED: zinc finger CCCH domain-containing protein 35-like [Setaria italica]	-	-	-	-	-	GO:0003824//catalytic activity;GO:0016787//hydrolase activity;GO:0016788//hydrolase activity, acting on ester bonds;GO:0052689//carboxylic ester hydrolase activity	GO:0071554//cell wall organization or biogenesis;GO:0045229//external encapsulating structure organization;GO:0009987//cellular process;GO:0071840//cellular component organization or biogenesis;GO:0016043//cellular component organization;GO:0071555//cell wall organization
Unigene0070117	339.3333333	336.3333333	2.8941	2.5329	2.1291	2.2774	1.9222	2.5749	2.5187	2.258166667	-0.157527324	0.651596915	0.98588495	no	BHLH49	PREDICTED: transcription factor bHLH78 [Amborella trichopoda]	-	-	-	-	-	-	-
Unigene0070189	491.3333333	498.6666667	9.2452	7.4181	10.2106	8.9062	7.222	8.3291	8.957966667	8.152433333	-0.135940559	0.682913151	0.99452762	no	BHLH30	PREDICTED: transcription factor bHLH30 [Amborella trichopoda]	-	-	-	-	-	-	-
Unigene0070220	1842.666667	2385.333333	13.3552	15.461	12.8739	16.4312	16.3809	15.9851	13.8967	16.26573333	0.227093535	0.391526867	0.880936346	no	PHL1	PREDICTED: protein PHR1-LIKE 1 [Amborella trichopoda]	-	-	-	-	-	-	-
Unigene0070362	895	1248.666667	10.157	11.9566	11.4906	13.6151	15.8325	12.7414	11.2014	14.063	0.328225333	0.269104734	0.816374984	no	MYB44	R2R3-MYB transcription factor MYB7 [Pinus taeda]	-	-	-	-	-	-	-
Unigene0070508	2742.666667	3110	34.2156	33.9178	26.2269	26.4262	30.3433	39.912	31.45343333	32.22716667	0.035059851	0.900453411	1	no	WRKY11	WRKY11 transcription factor [Ginkgo biloba]	-	-	-	-	-	-	-
Unigene0070539	73.33333333	122.3333333	1.6876	2.1247	0.8714	1.6355	3.4516	1.9942	1.561233333	2.360433333	0.596365566	0.234316507	0.795980892	no	MYB5	PREDICTED: transcription repressor MYB5 [Prunus mume]	-	-	-	-	-	-	-
Unigene0070771	963	1295	8.6185	14.6836	10.3252	12.4256	13.9276	14.7073	11.2091	13.68683333	0.288118249	0.370105575	0.868695368	no	HSFB2A	PREDICTED: heat stress transcription factor B-2b-like [Nelumbo nucifera]	-	-	-	-	-	-	-
Unigene0070803	573.3333333	851.3333333	4.134	4.5802	5.2162	6.848	6.0816	5.6814	4.643466667	6.203666667	0.417918892	0.182630132	0.734361469	no	Os11g0472000	PREDICTED: zinc finger CCCH domain-containing protein ZFN-like [Vitis vinifera]	-	-	-	-	-	-	-
Unigene0070849	89.66666667	112	0.6745	0.8006	1.0988	0.8344	1.1628	0.8681	0.857966667	0.9551	0.154730195	0.724471686	1	no	KAN2	PREDICTED: two-component response regulator ARR14-like [Nelumbo nucifera]	-	-	-	-	-	-	-
Unigene0070877	1538.333333	1672.666667	10.8096	10.7093	9.4226	9.9963	10.1548	10.2074	10.31383333	10.1195	-0.027442629	0.920933533	1	no	GT-2	Myb_DNA-bind_4 domain-containing protein [Cephalotus follicularis]	-	-	-	-	-	-	-
Unigene0070937	494.6666667	590.3333333	5.8752	7.7132	4.3575	7.1256	6.2803	6.1366	5.981966667	6.514166667	0.122960761	0.725994386	1	no	MYB39	PREDICTED: myb-related protein 306 [Nicotiana tomentosiformis]	-	-	-	-	-	-	-
Unigene0071106	1801.333333	2040.333333	10.9758	9.3471	13.0844	14.4372	10.4904	9.0421	11.13576667	11.32323333	0.024085089	0.93699057	1	no	FAMA	PREDICTED: transcription factor bHLH94 [Amborella trichopoda]	-	-	-	-	-	-	-
Unigene0071160	26.33333333	11.33333333	1.0235	1.438	0.9778	0.533	0.5332	0.2779	1.146433333	0.448033333	-1.355474486	0.05758686	0.444165978	no	MYB34	PREDICTED: myb-related protein 308 [Eucalyptus grandis]	-	-	-	-	-	-	-
Unigene0071177	1456.666667	1262.333333	12.8572	11.4564	13.8023	10.6533	8.4509	10.6058	12.7053	9.903333333	-0.359444337	0.213827338	0.770371483	no	DREB2C	PREDICTED: dehydration-responsive element-binding protein 2C-like isoform X1 [Phoenix dactylifera]	-	-	-	-	-	-	-
Unigene0071215	421.3333333	288.3333333	8.725	6.8857	7.0076	3.7522	5.7323	4.3598	7.539433333	4.614766667	-0.70819839	0.046195318	0.393751934	no	WRKY59	PREDICTED: probable WRKY transcription factor 51 [Cucumis sativus]	-	-	-	-	-	GO:1901363//heterocyclic compound binding;GO:0003677//DNA binding;GO:0003676//nucleic acid binding;GO:0097159//organic cyclic compound binding;GO:0005488//binding	GO:0044260//cellular macromolecule metabolic process;GO:0016070//RNA metabolic process;GO:0006725//cellular aromatic compound metabolic process;GO:0009058//biosynthetic process;GO:0044249//cellular biosynthetic process;GO:0009059//macromolecule biosynthetic process;GO:0090304//nucleic acid metabolic process;GO:0006807//nitrogen compound metabolic process;GO:0097659//nucleic acid-templated transcr…
Unigene0071257	57	51.66666667	1.0981	1.6221	0.9421	1.2342	0.5263	1.293	1.220766667	1.017833333	-0.26228613	0.629271361	0.979862192	no	TCP4	TCP family transcription factor [Medicago truncatula]	-	-	-	-	-	-	GO:0032501//multicellular organismal process;GO:0048869//cellular developmental process;GO:0044767//single-organism developmental process;GO:0050896//response to stimulus;GO:0007275//multicellular organism development;GO:0099402//plant organ development;GO:0040034//regulation of development, heterochronic;GO:0044707//single-multicellular organism process;GO:0050789//regulation of biological proce…
Unigene0071293	53.33333333	91	0.5551	0.8022	0.5303	0.8227	1.0432	1.055	0.6292	0.973633333	0.62985989	0.165279212	0.707454828	no	ERF114	transcription factor AP2-EREBP [Lotus japonicus]	-	-	-	-	-	-	GO:1901576//organic substance biosynthetic process;GO:0043170//macromolecule metabolic process;GO:0009059//macromolecule biosynthetic process;GO:0090304//nucleic acid metabolic process;GO:0019438//aromatic compound biosynthetic process;GO:0010467//gene expression;GO:1901360//organic cyclic compound metabolic process;GO:0006351//transcription, DNA-templated;GO:0044249//cellular biosynthetic proces…
Unigene0071349	811.6666667	745.6666667	4.975	4.1639	4.3494	3.7988	3.5771	3.7732	4.4961	3.716366667	-0.274781275	0.365330547	0.865262598	no	Os02g0557500	PREDICTED: zinc finger CCCH domain-containing protein 5 [Nelumbo nucifera]	-	-	-	-	-	-	-
Unigene0071365	455	580	4.4283	5.1106	4.778	5.2173	5.8582	5.3651	4.7723	5.4802	0.199543808	0.530387565	0.946448521	no	Os02g0793000	PREDICTED: zinc finger CCCH domain-containing protein 18 [Arachis ipaensis]	-	-	-	-	-	-	-
Unigene0071509	1711	1711	17.5144	22.6921	17.8429	16.6983	18.2743	17.5459	19.3498	17.50616667	-0.144455444	0.606102443	0.971822666	no	ASIL2	PREDICTED: trihelix transcription factor ASIL1 [Amborella trichopoda]	-	-	-	-	-	-	-
Unigene0071562	10	14.66666667	0.5616	0.4537	0	0.3881	0.6009	0.3758	0.338433333	0.454933333	0.426783475	0.728465665	1	no	NAC48	PREDICTED: NAC domain-containing protein 68-like isoform X1 [Phoenix dactylifera]	-	-	-	-	-	-	GO:0006139//nucleobase-containing compound metabolic process;GO:0046483//heterocycle metabolic process;GO:0018130//heterocycle biosynthetic process;GO:0044249//cellular biosynthetic process;GO:0009987//cellular process;GO:0090304//nucleic acid metabolic process;GO:0019438//aromatic compound biosynthetic process;GO:0044238//primary metabolic process;GO:0034654//nucleobase-containing compound biosy…
Unigene0071563	29	149.6666667	0.5848	0.5573	0.4737	1.0254	3.7135	2.6925	0.5386	2.477133333	2.20138539	7.46E-05	0.002832477	yes	NAC68	No apical meristem (NAM) protein [Corchorus olitorius]	-	-	-	-	-	-	-
Unigene0071564	0	4.666666667	0	0	0	0	0.6803	0.2836	0.001	0.3213	8.327777171	0.110338178	0.607425302	no	ONAC010	PREDICTED: NAC domain-containing protein 2-like [Ziziphus jujuba]	-	-	-	-	-	-	-
Unigene0071769	97.33333333	289.6666667	2.1422	1.0503	1.082	1.8102	3.7302	5.8119	1.424833333	3.7841	1.409157041	0.005567571	0.095205963	no	WRKY18	WRKY transcription factor 10 [Manihot esculenta]	-	-	-	-	-	-	-
Unigene0071790	157	280.3333333	2.3911	4.8994	2.2823	5.0627	5.4214	5.1827	3.190933333	5.222266667	0.710697661	0.087556401	0.544859796	no	ERF9	ERF12 [Taxus wallichiana var. chinensis] [Taxus wallichiana]	-	-	-	-	-	-	-
Unigene0071851	4367.666667	5157.333333	27.224	20.4667	22.8636	23.0673	26.009	25.5997	23.5181	24.892	0.08191064	0.740725472	1	no	CMTA4	PREDICTED: calmodulin-binding transcription activator 4 isoform X1 [Elaeis guineensis]	-	-	-	-	-	-	-
Unigene0071909	1045.666667	1415.333333	7.1469	7.9393	6.8894	7.4238	9.4922	9.8807	7.3252	8.932233333	0.286152789	0.332660145	0.848415914	no	WRKY4	PREDICTED: probable WRKY transcription factor 3 isoform X3 [Nelumbo nucifera]	-	-	-	-	-	-	-
Unigene0071913	203	216	2.066	1.9171	2.3481	2	1.9567	2.0862	2.1104	2.0143	-0.067237902	0.853697412	1	no	Os11g0197600	PREDICTED: B3 domain-containing protein Os11g0197600-like isoform X3 [Phoenix dactylifera]	-	-	-	-	-	-	-
Unigene0071980	138	213.6666667	2	2.6019	1.5219	3.2803	2.7232	2.6491	2.041266667	2.8842	0.498706544	0.197002932	0.753080884	no	WRKY35	WRKY transcription factor 35 family protein [Populus trichocarpa]	-	-	-	-	-	-	-
Unigene0071981	4	8	0.1976	0.0912	0	0.2959	0.1903	0.0441	0.096266667	0.176766667	0.876738006	0.530501745	0.946504977	no	WRKY35	PREDICTED: probable WRKY transcription factor 14 [Musa acuminata subsp. malaccensis] [Musa acuminata]	-	-	-	-	-	-	-
Unigene0071982	74.66666667	59.66666667	1.2056	1.5364	0.9772	1.2202	0.7412	0.7574	1.239733333	0.906266667	-0.452022303	0.343287078	0.854463032	no	WRI1	PREDICTED: AP2-like ethylene-responsive transcription factor At1g16060 [Daucus carota subsp. sativus] [Daucus carota]	-	-	-	-	-	-	GO:0034654//nucleobase-containing compound biosynthetic process;GO:0044249//cellular biosynthetic process;GO:0006139//nucleobase-containing compound metabolic process;GO:0019222//regulation of metabolic process;GO:0010556//regulation of macromolecule biosynthetic process;GO:0016070//RNA metabolic process;GO:0010467//gene expression;GO:1901360//organic cyclic compound metabolic process;GO:0009987/…
Unigene0072023	5.333333333	3.333333333	0.3918	0.633	0.5124	0.3609	0	0.5242	0.5124	0.295033333	-0.796392514	0.630694077	0.980339997	no	HOX19	PREDICTED: homeobox-leucine zipper protein HAT14-like [Ziziphus jujuba]	-	-	-	-	GO:0044424//intracellular part;GO:0043227//membrane-bounded organelle;GO:0044464//cell part;GO:0043226//organelle;GO:0005622//intracellular;GO:0005623//cell;GO:0043229//intracellular organelle;GO:0043231//intracellular membrane-bounded organelle	GO:1901363//heterocyclic compound binding;GO:0005488//binding;GO:0001071//nucleic acid binding transcription factor activity;GO:0097159//organic cyclic compound binding;GO:0003676//nucleic acid binding;GO:0003677//DNA binding	GO:0019438//aromatic compound biosynthetic process;GO:0006351//transcription, DNA-templated;GO:0034641//cellular nitrogen compound metabolic process;GO:0006807//nitrogen compound metabolic process;GO:0071704//organic substance metabolic process;GO:1901576//organic substance biosynthetic process;GO:0009987//cellular process;GO:0032774//RNA biosynthetic process;GO:0043170//macromolecule metabolic p…
Unigene0072024	373	598.6666667	4.1629	5.0805	3.8925	5.7528	4.8837	8.5049	4.378633333	6.380466667	0.543181303	0.130529196	0.650939769	no	HAT22	CRHB10, partial [Ceratopteris richardii]	-	-	-	-	GO:0044424//intracellular part;GO:0043227//membrane-bounded organelle;GO:0043229//intracellular organelle;GO:0005623//cell;GO:0043231//intracellular membrane-bounded organelle;GO:0044464//cell part;GO:0043226//organelle;GO:0005622//intracellular	GO:0003677//DNA binding;GO:0001071//nucleic acid binding transcription factor activity;GO:1901363//heterocyclic compound binding;GO:0005488//binding;GO:0003676//nucleic acid binding;GO:0097159//organic cyclic compound binding	GO:0071704//organic substance metabolic process;GO:0009058//biosynthetic process;GO:0044237//cellular metabolic process;GO:0034641//cellular nitrogen compound metabolic process;GO:0043170//macromolecule metabolic process;GO:0006725//cellular aromatic compound metabolic process;GO:0009059//macromolecule biosynthetic process;GO:0044249//cellular biosynthetic process;GO:0032774//RNA biosynthetic pro…
Unigene0072034	515	510	3.7807	5.3811	4.4631	4.2195	3.1821	4.8547	4.541633333	4.085433333	-0.152722125	0.659603467	0.98825728	no	MYB4	MYB transcription factor [Allium cepa]	-	-	-	-	-	-	-
Unigene0072068	1850.333333	2402	17.2969	11.6837	16.6369	15.8516	17.9219	19.0698	15.20583333	17.61443333	0.21213318	0.455655132	0.916615119	no	Dnajc2	PREDICTED: dnaJ homolog subfamily C member 2 [Eucalyptus grandis]	-	-	-	-	-	-	-
Unigene0072076	855	945.6666667	7.071	6.4447	5.5943	7.0509	5.929	6.1323	6.37	6.370733333	0.000166078	1	1	no	--	PREDICTED: afadin [Amborella trichopoda]	-	-	-	-	-	-	-
Unigene0072104	875.6666667	1009	7.8436	7.5909	7.3602	7.939	7.8195	7.9068	7.598233333	7.888433333	0.054074789	0.854588047	1	no	--	PREDICTED: telomeric repeat-binding factor 2 isoform X1 [Eucalyptus grandis]	-	-	-	-	-	-	-
Unigene0072180	9.333333333	18.66666667	0.3159	0.1061	0.3906	0.8466	0.0983	0.5123	0.270866667	0.485733333	0.842581631	0.387009814	0.877012362	no	WRKY17	PREDICTED: probable WRKY transcription factor 7 [Prunus mume]	-	-	-	-	-	GO:1901363//heterocyclic compound binding;GO:0005488//binding;GO:0003676//nucleic acid binding;GO:0005515//protein binding;GO:0003677//DNA binding;GO:0097159//organic cyclic compound binding	GO:0097659//nucleic acid-templated transcription;GO:0006725//cellular aromatic compound metabolic process;GO:0006807//nitrogen compound metabolic process;GO:0044260//cellular macromolecule metabolic process;GO:1901698//response to nitrogen compound;GO:0006139//nucleobase-containing compound metabolic process;GO:0019438//aromatic compound biosynthetic process;GO:1901576//organic substance biosynth…
Unigene0072181	1328.333333	1544.333333	15.1809	14.9383	13.457	13.9961	15.6525	15.9972	14.5254	15.21526667	0.066941726	0.811589717	1	no	WRKY21	PREDICTED: protein WRKY1-like isoform X1 [Phoenix dactylifera]	-	-	-	-	-	-	-
Unigene0072240	907	767	14.1482	15.7098	11.7545	11.5559	11.1223	9.2016	13.87083333	10.6266	-0.384374387	0.218781658	0.776280576	no	WIP6	PREDICTED: zinc finger protein WIP6-like [Nelumbo nucifera]	-	-	-	-	-	-	-
Unigene0072241	7023.333333	6919.666667	24.1888	33.3085	25.5103	23.6653	28.821	21.4415	27.6692	24.6426	-0.167126451	0.509832899	0.938213941	no	ZFP3	PREDICTED: zinc finger protein 3-like [Vitis vinifera]	-	-	-	-	-	-	-
Unigene0072266	563	669.6666667	9.1424	5.2678	8.4712	9.1862	7.9644	7.1497	7.627133333	8.1001	0.086798799	0.8046983	1	no	RKD5	protein NLP3-like [Ananas comosus]	-	-	-	-	-	-	-
Unigene0072267	0	1	0	0	0	0.0802	0.149	0	0.001	0.0764	6.255500733	0.481567702	0.928914421	no	RKD5	protein RKD5-like isoform X2 [Ananas comosus]	-	-	-	-	-	-	-
Unigene0072273	278.6666667	275	1.8251	1.2387	1.4379	1.4012	1.4226	1.1581	1.500566667	1.3273	-0.177012926	0.621756591	0.976974498	no	ARF4	ARF-L2 protein, partial [Ginkgo biloba]	-	-	-	-	-	-	-
Unigene0072281	821	1128	11.263	7.5282	11.8627	12.8957	13.2627	11.3838	10.21796667	12.51406667	0.29244256	0.360698029	0.862239156	no	WOX8	WUSCHEL-related homeobox protein 13B [Physcomitrella patens]	-	-	-	-	-	-	-
Unigene0072500	1143.666667	1046.666667	6.6886	6.1809	7.0781	6.3623	4.9657	5.1127	6.6492	5.480233333	-0.278943452	0.347867462	0.854463032	no	U2AF35A	PREDICTED: splicing factor U2af small subunit B-like [Juglans regia]	Genetic Information Processing	Transcription	ko03040//Spliceosome	K12836	-	-	-
Unigene0072716	412.6666667	485.3333333	2.8311	2.776	2.9915	3.5661	2.9462	2.6007	2.8662	3.037666667	0.083824284	0.801573883	1	no	NFYA1	NFYA4 [Larix kaempferi]	-	-	-	-	-	-	-
Unigene0072805	90.33333333	133.3333333	0.8996	1.2931	0.492	0.6405	1.8375	1.1126	0.8949	1.196866667	0.419464059	0.423911312	0.899991917	no	ZAT4	PREDICTED: zinc finger protein ZAT9-like [Gossypium arboreum]	-	-	-	-	-	-	-
Unigene0072830	228.6666667	205.6666667	4.3509	5.9119	3.4786	3.8571	3.0388	4.3938	4.580466667	3.763233333	-0.283521846	0.464923687	0.922351637	no	ZHD1	PREDICTED: zinc-finger homeodomain protein 4-like [Musa acuminata subsp. malaccensis] [Musa acuminata]	-	-	-	-	-	-	-
Unigene0072861	2290.333333	2690.333333	19.5125	18.6622	18.3829	18.6449	20.847	20.2552	18.85253333	19.9157	0.079147788	0.757464026	1	no	WRKY4	WRKY transcription factor PmWRKY121, partial [Pinus monticola]	-	-	-	-	-	-	-
Unigene0072934	3491	3531.333333	36.4049	37.4043	34.0547	31.4977	37.7514	28.932	35.95463333	32.72703333	-0.135694867	0.592404145	0.969975584	no	TCP23	PREDICTED: transcription factor TCP23-like [Nicotiana tabacum]	-	-	-	-	-	-	-
Unigene0072980	197.3333333	235.6666667	1.9821	2.3529	1.7556	2.7825	2.1901	1.6371	2.0302	2.203233333	0.118000434	0.763295217	1	no	NAC098	NACa protein, partial [Ginkgo biloba]	-	-	-	-	-	-	-
Unigene0072983	112.6666667	124	0.963	2.209	1.8106	2.0933	1.3652	1.5437	1.660866667	1.6674	0.005663981	1	1	no	MYB4	transcription factor MYB34 [Picea abies]	-	-	-	-	-	GO:0005488//binding	-
Unigene0072984	21	29.66666667	0.444	0.5218	0.2745	0.4277	0.6564	0.5041	0.413433333	0.5294	0.356703483	0.595321693	0.970437658	no	MYB4	transcription factor MYB34 [Picea abies]	-	-	-	-	-	GO:0005488//binding	-
Unigene0072985	13.33333333	11	0.0869	0.2407	0.5455	0.5003	0.0372	0.1163	0.291033333	0.217933333	-0.417297524	0.714653061	0.998848533	no	MYB4	PREDICTED: myb-related protein 308-like [Erythranthe guttata]	-	-	-	-	-	-	-
Unigene0072991	276.6666667	360	4.8408	2.7966	4.0578	4.3815	5.1002	4.0783	3.8984	4.52	0.213440645	0.560022104	0.957817393	no	WOX8	HD transcription factor [Ginkgo biloba]	-	-	-	-	-	-	-
Unigene0072992	296	527.6666667	1.701	4.2948	1.4165	5.6847	2.6666	3.9715	2.470766667	4.1076	0.733336926	0.129001422	0.647842495	no	TT8	transcription factor bHLH-1 [Picea abies]	-	-	-	-	-	-	-
Unigene0073061	72	64.33333333	1.5944	1.0734	0.8688	1.2087	0.796	0.8593	1.178866667	0.954666667	-0.304331563	0.530324821	0.946395969	no	MYB26	PREDICTED: transcription factor MYB86 [Vitis vinifera]	-	-	-	-	-	-	-
Unigene0073100	7.333333333	35	0.092	0.4247	0.4812	1.5678	0.9448	1.8053	0.332633333	1.4393	2.113362677	0.006958767	0.112622567	no	ERF105	PREDICTED: ethylene-responsive transcription factor ERF107 [Citrus sinensis]	-	-	-	-	-	-	-
Unigene0073140	42	82	1.9077	1.1009	1.2475	1.8203	2.4784	3.1301	1.4187	2.476266667	0.803597138	0.101770063	0.586656175	no	SCL3	PREDICTED: scarecrow-like protein 3 isoform X3 [Daucus carota subsp. sativus] [Daucus carota]	-	-	-	-	-	-	-
Unigene0073141	134	169	1.9534	2.1542	3.1224	2.1662	2.3839	3.5979	2.41	2.716	0.172450333	0.672770148	0.992018725	no	SCL3	GRS3 GRAS-type protein [Physcomitrella patens]	-	-	-	-	-	-	-
Unigene0073403	7114	8084.666667	44.6137	41.0561	42.5383	39.2873	44.4641	47.1402	42.73603333	43.63053333	0.029885103	0.898126274	1	no	EIN3	PREDICTED: LOW QUALITY PROTEIN: ETHYLENE INSENSITIVE 3-like 1 protein [Amborella trichopoda]	Environmental Information Processing	Signal transduction	ko04075//Plant hormone signal transduction	K14514	-	-	-
Unigene0073409	1018.333333	882.6666667	10.5458	10.2776	10.7603	8.2313	8.9991	7.3636	10.5279	8.198	-0.360873796	0.224233017	0.782622923	no	ASIL2	PREDICTED: trihelix transcription factor ASIL2 [Amborella trichopoda]	-	-	-	-	-	-	-
Unigene0073423	177.3333333	69	2.5194	2.485	3.2582	0.6487	0.9241	1.2982	2.7542	0.957	-1.525042497	0.000371277	0.011144214	yes	ZFWD2(C3H)	PREDICTED: zinc finger CCCH domain-containing protein 17 [Amborella trichopoda]	-	-	-	-	-	-	-
Unigene0073429	1192	1456.666667	9.4612	8.0712	8.417	8.9463	10.0765	9.4482	8.6498	9.490333333	0.133791985	0.637097121	0.982346702	no	IDD2	PREDICTED: protein indeterminate-domain 2-like isoform X1 [Nelumbo nucifera]	-	-	-	-	-	-	-
Unigene0073433	1611.333333	1983.333333	8.8881	8.0232	8.7054	7.9713	9.2763	11.0495	8.5389	9.432366667	0.143569571	0.609600912	0.972932139	no	Os07g0679700	PREDICTED: B3 domain-containing protein Os07g0679700-like isoform X1 [Nelumbo nucifera]	-	-	-	-	-	-	-
Unigene0073530	1132.666667	829.6666667	9.2611	11.5023	7.3448	7.4412	7.0143	4.2627	9.3694	6.2394	-0.586549361	0.091077905	0.556674069	no	HAT14	homeobox protein, partial [Arabidopsis thaliana]	-	-	-	-	-	-	GO:1901362//organic cyclic compound biosynthetic process;GO:1901360//organic cyclic compound metabolic process;GO:0019438//aromatic compound biosynthetic process;GO:0071704//organic substance metabolic process;GO:0032774//RNA biosynthetic process;GO:0090304//nucleic acid metabolic process;GO:0034641//cellular nitrogen compound metabolic process;GO:0006139//nucleobase-containing compound metabolic…
Unigene0073581	79	66.66666667	1.1512	1.7462	0.8948	1.0303	0.9149	0.9829	1.264066667	0.976033333	-0.373070229	0.424798783	0.900616071	no	BHLH30	PREDICTED: transcription factor bHLH30 [Amborella trichopoda]	-	-	-	-	-	-	-
Unigene0073635	1422	1424	18.9425	25.4166	20.6803	19.926	19.8936	19.1415	21.6798	19.6537	-0.141550508	0.621876944	0.977067673	no	BHLH66	transcription factor bHLH7-like [Asparagus officinalis]	-	-	-	-	-	-	-
Unigene0073723	71.66666667	116.6666667	0.9899	2.8056	0.9635	2.1633	2.9161	2.0536	1.586333333	2.377666667	0.583850519	0.266649541	0.813234758	no	BZIP17	bZIP transcription factor 50 [Ananas comosus]	-	-	-	-	-	-	-
Unigene0073758	1022.666667	795.3333333	9.642	13.3793	10.8652	7.9708	6.7213	9.2234	11.2955	7.971833333	-0.50276468	0.113112067	0.61374772	no	HSFA1	PREDICTED: heat shock factor protein HSF8 [Nelumbo nucifera]	-	-	-	-	-	-	-
Unigene0073765	177.3333333	406.3333333	1.6913	1.1471	1.3922	3.5225	3.1147	2.0593	1.4102	2.898833333	1.039572603	0.006523868	0.10776245	no	MYB86	MYB61 protein [Betula platyphylla]	-	-	-	-	-	-	GO:0071310//cellular response to organic substance;GO:0009628//response to abiotic stimulus;GO:0042221//response to chemical;GO:0050896//response to stimulus;GO:0009755//hormone-mediated signaling pathway;GO:0023052//signaling;GO:0010033//response to organic substance;GO:0050789//regulation of biological process;GO:0006972//hyperosmotic response;GO:0032870//cellular response to hormone stimulus;G…
Unigene0073872	171.3333333	217.6666667	1.5572	1.6454	1.1586	1.4506	2.0362	1.5126	1.453733333	1.666466667	0.197029809	0.606382635	0.971882721	no	SGR5	Zinc finger protein MAGPIE, partial [Anthurium amnicola]	-	-	-	-	-	-	-
Unigene0073922	2912	3521	35.4843	47.1082	37.7878	45.1054	44.3783	42.3346	40.12676667	43.93943333	0.130951353	0.611397524	0.973436849	no	HYH	bZIP transcription factor 60 [Triticum urartu]	-	-	-	-	-	-	-
Unigene0073941	4834.333333	5327	53.6764	56.1403	51.1177	56.2058	56.3222	47.4301	53.6448	53.31936667	-0.008778688	0.971033554	1	no	APL	PREDICTED: myb family transcription factor APL [Amborella trichopoda]	-	-	-	-	-	-	-
Unigene0074091	2006	2617.333333	19.7265	26.9739	18.1057	27.9197	25.542	23.4496	21.60203333	25.6371	0.247065962	0.37955536	0.871562364	no	SMH3	PREDICTED: single myb histone 4 [Musa acuminata subsp. malaccensis] [Musa acuminata]	-	-	-	-	-	-	-
Unigene0074117	1640.333333	1816	22.5141	25.524	23.4329	25.659	22.6892	23.1614	23.82366667	23.83653333	0.000778959	0.998634007	1	no	--	PREDICTED: trihelix transcription factor ASR3 [Elaeis guineensis]	-	-	-	-	-	-	-
Unigene0074124	148.6666667	225.6666667	1.1232	1.7134	2.5803	2.8907	2.4765	1.993	1.805633333	2.4534	0.442277512	0.295129186	0.835226783	no	BPC6	PREDICTED: barley B recombinant-like protein D isoform X2 [Amborella trichopoda]	-	-	-	-	-	-	-
Unigene0074138	1075.333333	1119.333333	7.2575	7.3739	7.4917	7.1597	7.0259	6.5484	7.374366667	6.911333333	-0.09355509	0.745505073	1	no	TGA4	PREDICTED: transcription factor TGA4 isoform X1 [Elaeis guineensis]	Environmental Information Processing	Signal transduction	ko04075//Plant hormone signal transduction	K14431	-	-	-
Unigene0074153	1405.333333	853.6666667	20.9294	27.8716	22.0057	12.6444	17.0929	9.0374	23.60223333	12.9249	-0.868770261	0.010189015	0.148617175	no	ERF010	PREDICTED: ethylene-responsive transcription factor ERF017 [Ricinus communis]	-	-	-	-	-	-	-
Unigene0074187	11.66666667	5	0.2742	0.9115	0.6886	0	0.4694	0.2446	0.624766667	0.238	-1.39235591	0.268771487	0.815869513	no	--	SCL16, partial [Pinus radiata]	-	-	-	-	-	-	-
Unigene0074250	7.666666667	12	0.0876	0.6469	0.2291	0.8472	0.075	0.5078	0.3212	0.476666667	0.569508848	0.654869209	0.98749172	no	SCR	PREDICTED: protein SCARECROW-like [Erythranthe guttata]	-	-	-	-	-	-	-
Unigene0074312	2160.666667	4030.666667	15.2918	16.2089	17.3317	30.9011	28.5183	22.5833	16.27746667	27.33423333	0.747832727	0.004391508	0.07987771	no	NAC019	NAC transcription factor-like protein [Medicago truncatula]	-	-	-	-	GO:0043229//intracellular organelle;GO:0044424//intracellular part;GO:0043227//membrane-bounded organelle;GO:0043231//intracellular membrane-bounded organelle;GO:0044464//cell part;GO:0043226//organelle;GO:0005623//cell;GO:0005622//intracellular	GO:0005488//binding	GO:0044699//single-organism process;GO:0097305//response to alcohol;GO:0034654//nucleobase-containing compound biosynthetic process;GO:0048856//anatomical structure development;GO:0050789//regulation of biological process;GO:0009737//response to abscisic acid;GO:0044260//cellular macromolecule metabolic process;GO:0065007//biological regulation;GO:0090304//nucleic acid metabolic process;GO:007170…
Unigene0074374	8118.333333	5403.333333	56.6846	62.1741	72.4255	34.6493	37.6157	41.9799	63.7614	38.08163333	-0.743587949	0.002134204	0.046088641	no	--	PREDICTED: GATA transcription factor 21-like [Gossypium hirsutum]	-	-	-	-	-	-	-
Unigene0074391	2887.333333	3261.333333	14.4004	14.2599	12.598	13.5297	14.9945	13.4757	13.75276667	13.99996667	0.025701515	0.919065976	1	no	ARF2	PREDICTED: auxin response factor 2-like [Nelumbo nucifera]	-	-	-	-	-	-	-
Unigene0074469	433	515.3333333	5.5045	6.5619	4.6597	6.1847	6.3303	5.5314	5.575366667	6.015466667	0.109609975	0.742975352	1	no	Os06g0130600	GAGA-binding transcriptional activator [Picea sitchensis]	-	-	-	-	-	-	-
Unigene0074519	113	121.3333333	0.9402	3.7205	2.7405	2.8462	1.6095	2.8358	2.467066667	2.4305	-0.021543567	0.968802033	1	no	HOX16	homeobox-leucine zipper-like protein [Picea glauca]	-	-	-	-	-	-	-
Unigene0074563	2658.666667	3058.666667	14.8176	16.2777	11.2789	13.9507	16.3606	13.803	14.12473333	14.70476667	0.058060261	0.830304587	1	no	PDF2	PREDICTED: homeobox-leucine zipper protein ROC8 isoform X3 [Amborella trichopoda]	-	-	-	-	-	-	-
Unigene0074594	2485.333333	2764.333333	19.228	20.1618	18.1588	20.1183	19.971	17.6697	19.18286667	19.253	0.005264933	0.98422308	1	no	Os01g0192000	PREDICTED: zinc finger CCCH domain-containing protein 20 [Jatropha curcas]	-	-	-	-	-	GO:0016788//hydrolase activity, acting on ester bonds;GO:0016787//hydrolase activity;GO:0052689//carboxylic ester hydrolase activity;GO:0003824//catalytic activity	GO:0071554//cell wall organization or biogenesis;GO:0016043//cellular component organization;GO:0009987//cellular process;GO:0071840//cellular component organization or biogenesis;GO:0071555//cell wall organization;GO:0045229//external encapsulating structure organization
Unigene0074598	1580	1922.666667	12.137	12.0068	13.9034	13.8407	17.0911	10.5014	12.6824	13.81106667	0.122996962	0.679508142	0.994270232	no	IDD6	PREDICTED: protein indeterminate-domain 5, chloroplastic-like [Nelumbo nucifera]	-	-	-	-	-	-	-
Unigene0074705	717	642.6666667	6.6034	5.058	6.8366	4.9115	4.5554	5.381	6.166	4.9493	-0.317110396	0.320651518	0.839896969	no	PAT1	SCL10 [Pinus radiata]	-	-	-	-	-	-	-
Unigene0074782	15117.33333	14144.33333	88.4947	58.2405	91.6587	70.7861	73.2179	54.7748	79.46463333	66.2596	-0.262183421	0.315743471	0.839190352	no	HOX20	PREDICTED: homeobox-leucine zipper protein HOX20-like [Phoenix dactylifera]	-	-	-	-	GO:0043231//intracellular membrane-bounded organelle;GO:0043226//organelle;GO:0005622//intracellular;GO:0044424//intracellular part;GO:0005623//cell;GO:0044464//cell part;GO:0043227//membrane-bounded organelle;GO:0043229//intracellular organelle	GO:0001071//nucleic acid binding transcription factor activity;GO:0005488//binding;GO:0097159//organic cyclic compound binding;GO:0003676//nucleic acid binding;GO:0003677//DNA binding;GO:1901363//heterocyclic compound binding	GO:1901360//organic cyclic compound metabolic process;GO:0044260//cellular macromolecule metabolic process;GO:0032774//RNA biosynthetic process;GO:0009987//cellular process;GO:0044249//cellular biosynthetic process;GO:0009058//biosynthetic process;GO:0097659//nucleic acid-templated transcription;GO:1901362//organic cyclic compound biosynthetic process;GO:0009059//macromolecule biosynthetic proces…
Unigene0074820	1466.666667	1688	8.4581	6.257	8.0219	7.5526	7.9252	7.9398	7.579	7.805866667	0.042551313	0.881481947	1	no	SPL6	SBP domain-containing protein [Cephalotus follicularis]	-	-	-	-	-	-	-
Unigene0074886	1131.333333	1395.333333	7.3822	5.5184	7.0787	7.4348	6.8207	7.8336	6.659766667	7.363033333	0.144828601	0.622105724	0.977142979	no	Os04g0671800	PREDICTED: zinc finger CCCH domain-containing protein 32-like [Nelumbo nucifera]	-	-	-	-	-	-	-
Unigene0074930	70.66666667	270.3333333	0.8629	1.2983	1.1703	4.9316	2.954	3.7061	1.1105	3.8639	1.798848364	1.17E-05	0.000561404	yes	WRKY35	PREDICTED: probable WRKY transcription factor 14 [Nicotiana tomentosiformis]	-	-	-	-	-	-	-
Unigene0074973	542.3333333	518.6666667	12.6266	14.2437	10.3784	10.4501	10.767	11.0554	12.41623333	10.7575	-0.206884735	0.52379013	0.943353091	no	ERF3	ethylene-responsive element binding factor-like protein [Picea sitchensis]	-	-	-	-	-	-	-
Unigene0074974	1795	2039.666667	39.0285	46.3966	36.7033	39.3604	43.7215	42.376	40.70946667	41.8193	0.038804592	0.887726303	1	no	ERF3	ethylene-responsive element binding factor-like protein [Picea sitchensis]	-	-	-	-	-	-	-
Unigene0074994	55.33333333	56.33333333	1.1251	0.7082	0.981	0.8638	0.4377	1.2773	0.9381	0.8596	-0.126076237	0.822459099	1	no	BHLH49	PREDICTED: transcription factor bHLH78 [Amborella trichopoda]	-	-	-	-	-	-	-
Unigene0075048	1.333333333	5.666666667	0.1149	0	0	0.1058	0.1229	0.2049	0.0383	0.144533333	1.915985959	0.295321648	0.835272238	no	--	YABBY transcription factor, partial [Taxus globosa]	-	-	-	-	-	-	-
Unigene0075049	112	253.3333333	1.5571	2.4871	1.0264	3.2133	3.6249	3.6669	1.6902	3.5017	1.05086152	0.013428836	0.179357747	no	YAB5	YABBY transcription factor, partial [Taxus globosa]	-	-	-	-	-	-	-
Unigene0075087	892.3333333	582.6666667	7.6989	8.0609	7.9426	4.059	5.2454	4.5945	7.9008	4.632966667	-0.770062439	0.012943415	0.175107682	no	BHLH49	PREDICTED: transcription factor bHLH49 isoform X2 [Erythranthe guttata]	-	-	-	-	-	-	-
Unigene0075128	357	451.6666667	2.8447	2.6339	3.1205	3.6437	3.3365	2.7907	2.866366667	3.256966667	0.184305783	0.581270447	0.964760687	no	BOA	GARP2 [Taxus wallichiana var. chinensis] [Taxus wallichiana]	-	-	-	-	-	-	-
Unigene0075143	3222	4831	19.991	18.9944	23.6729	28.8245	25.083	30.4642	20.8861	28.1239	0.429253542	0.086900436	0.543045501	no	ARF4	ARF-L2 protein, partial [Ginkgo biloba]	Environmental Information Processing	Signal transduction	ko04075//Plant hormone signal transduction	K14486	-	-	-
Unigene0075201	2433.333333	2452	12.3977	14.1645	12.6916	12.0961	12.7519	10.8353	13.0846	11.89443333	-0.13758328	0.597248884	0.970734535	no	SCRM	PREDICTED: transcription factor ICE1 [Nelumbo nucifera]	-	-	-	-	-	-	-
Unigene0075202	1904	1981.333333	25.4668	29.2613	24.1899	24.7181	26.3195	23.1565	26.306	24.73136667	-0.089049928	0.74242097	1	no	DIVARICATA	PREDICTED: transcription factor DIVARICATA [Musa acuminata subsp. malaccensis] [Musa acuminata]	-	-	-	-	-	-	-
Unigene0075235	507.3333333	718.3333333	3.4629	5.1018	2.4544	6.5315	3.614	4.2251	3.673033333	4.7902	0.383113904	0.331226614	0.84759514	no	GRF6	GRF2 [Pinus tabuliformis]	-	-	-	-	-	-	-
Unigene0075396	1146	1053.666667	8.9758	11.4372	7.6545	7.5084	8.3534	7.5456	9.355833333	7.802466667	-0.261935873	0.393069953	0.881814026	no	MYB4	mixta-like2 MYB transcription factor, partial [Thalictrum dioicum]	-	-	-	-	-	-	-
Unigene0075427	1118.333333	891.6666667	12.6921	12.4643	11.9881	8.974	8.9132	8.7994	12.3815	8.895533333	-0.477033095	0.10052885	0.581963092	no	Os01g0252200	PREDICTED: zinc finger CCCH domain-containing protein 3 isoform X2 [Vitis vinifera]	-	-	-	-	-	-	-
Unigene0075477	504.3333333	984	8.6417	8.2584	6.8397	13.602	13.1277	15.1333	7.913266667	13.95433333	0.818367921	0.008844545	0.134126842	no	WRKY57	PREDICTED: probable WRKY transcription factor 50 isoform X1 [Capsicum annuum]	-	-	-	-	-	-	-
Unigene0075507	843	925.6666667	12.7931	17.9529	16.2719	15.4072	16.7071	14.48	15.67263333	15.53143333	-0.013056627	0.96767539	1	no	ERF071	PREDICTED: ethylene-responsive transcription factor ERF071 isoform X1 [Fragaria vesca subsp. vesca] [Fragaria vesca]	-	-	-	-	-	-	-
Unigene0075520	959	1192.666667	11.1712	17.6057	15.065	16.8529	16.6127	15.8892	14.61396667	16.4516	0.170880078	0.583214966	0.965847844	no	GATA9	PREDICTED: GATA transcription factor 9-like [Malus domestica]	-	-	-	-	-	-	-
Unigene0075522	46.66666667	89	0.3281	1.0243	0.7848	1.2381	1.0699	1.4079	0.7124	1.238633333	0.797989755	0.127320097	0.642921581	no	GAI1	DPL [Pinus tabuliformis]	Environmental Information Processing	Signal transduction	ko04075//Plant hormone signal transduction	K14494	-	-	-
Unigene0075563	4233	3822.666667	52.1904	70.5679	57.8336	47.2283	53.5308	46.6212	60.1973	49.12676667	-0.29318949	0.246954019	0.805850299	no	MIF2	mini zinc finger 1 [Welwitschia mirabilis]	-	-	-	-	-	-	-
Unigene0075590	149.3333333	225.6666667	1.8405	1.6993	1.0784	1.6375	3.0605	1.5762	1.5394	2.0914	0.442100865	0.30419198	0.838508349	no	SGR5	PREDICTED: protein indeterminate-domain 16-like [Nelumbo nucifera]	-	-	-	-	-	-	-
Unigene0075591	69.66666667	66.33333333	1.8608	3.1035	1.0991	1.8802	2.4146	0.9906	2.021133333	1.7618	-0.19811434	0.724375952	1	no	SGR5	PREDICTED: protein SHOOT GRAVITROPISM 5-like [Gossypium arboreum]	-	-	-	-	-	-	-
Unigene0075650	2508.333333	1858	23.8254	26.1139	29.8624	20.8835	16.1171	16.2724	26.60056667	17.75766667	-0.583014954	0.034284661	0.329139727	no	ATHB-13	homeobox-leucine zipper-like protein [Picea glauca]	-	-	-	-	-	-	-
Unigene0075710	358.6666667	366	3.5828	6.5894	4.8538	4.4448	4.4714	5.0169	5.008666667	4.644366667	-0.108944726	0.767137369	1	no	CDF4	Dof4 [Pinus pinaster]	-	-	-	-	-	-	-
Unigene0075829	225.3333333	259.6666667	1.8092	3.5746	2.587	2.5779	3.7575	1.9689	2.656933333	2.7681	0.059134034	0.892907186	1	no	LOB	PREDICTED: protein LATERAL ORGAN BOUNDARIES [Amborella trichopoda]	-	-	-	-	-	-	-
Unigene0075867	190.3333333	353.3333333	3.9584	4.9556	3.6035	5.1715	9.7236	6.0049	4.1725	6.966666667	0.739556487	0.059412807	0.451627988	no	--	predicted protein [Physcomitrella patens]	-	-	-	-	-	-	-
Unigene0076013	182.6666667	168.3333333	2.1602	3.3812	3.5845	2.6587	1.8633	3.0862	3.041966667	2.536066667	-0.262411674	0.517131393	0.940285759	no	GGM13	B-class MADS-box transcription factor, partial [Cryptomeria japonica]	-	-	-	-	-	-	-
Unigene0076135	538.6666667	942.6666667	4.8945	5.4076	2.6595	8.4804	5.1185	7.2061	4.320533333	6.935	0.682686471	0.07150871	0.495626614	no	AIL1	AINTEGUMENTA-like protein [Ginkgo biloba]	-	-	-	-	-	-	-
Unigene0076240	2899.333333	3003.666667	23.0736	27.4494	20.6679	20.5426	22.8255	23.3734	23.7303	22.24716667	-0.093108729	0.720753229	1	no	GATA7	PREDICTED: GATA transcription factor 9-like [Cucumis melo]	-	-	-	-	-	-	-
Unigene0076276	6075.333333	6850	31.8585	25.7077	28.5635	28.8053	30.2578	28.0788	28.7099	29.0473	0.016855763	0.943237122	1	no	BLH4	PREDICTED: BEL1-like homeodomain protein 4 [Amborella trichopoda]	-	-	-	-	-	-	-
Unigene0076373	2365	2915	20.2925	18.6535	23.6996	25.6813	22.7918	20.8094	20.88186667	23.09416667	0.145277806	0.582771863	0.965526067	no	GATA16	PREDICTED: GATA transcription factor 16-like [Citrus sinensis]	-	-	-	-	-	-	-
Unigene0076467	1.666666667	0.666666667	0.0571	0.0791	0	0.0526	0	0	0.0454	0.017533333	-1.372591999	0.748921576	1	no	VOZ1	Transcription factor VOZ1 [Ananas comosus]	-	-	-	-	-	-	-
Unigene0076469	310	274	3.6649	5.029	2.7636	3.5162	2.6825	3.0664	3.819166667	3.088366667	-0.306413833	0.416412849	0.895043487	no	VOZ1	PREDICTED: transcription factor VOZ1-like isoform X4 [Gossypium hirsutum]	-	-	-	-	-	-	-
Unigene0076480	5864.333333	6147.666667	45.615	31.1265	40.9155	38.7497	37.3645	34.2895	39.219	36.80123333	-0.091798634	0.713851956	0.998561045	no	Os11g0472000	PREDICTED: zinc finger CCCH domain-containing protein ZFN-like isoform X2 [Elaeis guineensis]	-	-	-	-	-	-	-
Unigene0076498	1619	1439	15.8686	20.8206	18.4507	13.6519	15.3992	15.1749	18.37996667	14.742	-0.318201887	0.261904324	0.812680844	no	ZHD3	zinc finger-homeodomain protein 2 [Saruma henryi]	-	-	-	-	-	-	-
Unigene0076502	21955.66667	25559	249.4104	259.0645	230.8942	255.6909	282.1959	237.849	246.4563667	258.5786	0.069270632	0.759114088	1	no	EREBP1	PREDICTED: ethylene-responsive transcription factor 1 [Elaeis guineensis]	-	-	-	-	-	-	-
Unigene0076640	163.3333333	256.3333333	1.5964	2.3784	1.8349	2.6964	3.0329	2.5246	1.936566667	2.7513	0.506612292	0.168744899	0.715120799	no	APL	PREDICTED: myb family transcription factor APL isoform X2 [Amborella trichopoda]	-	-	-	-	-	-	-
Unigene0076648	736.3333333	643.6666667	6.6296	7.4086	8.7223	5.868	5.4693	6.5453	7.586833333	5.960866667	-0.347975742	0.27113659	0.818698768	no	TRB1	PREDICTED: telomere repeat-binding factor 1 isoform X2 [Amborella trichopoda]	-	-	-	-	-	-	-
Unigene0076664	2730	3332	16.7202	18.7437	13.6321	20.6062	19.7449	13.9612	16.36533333	18.1041	0.145673471	0.601905637	0.971452371	no	ATHB-15	class III homeodomain-leucine zipper protein C3HDZ2 [Taxus globosa]	-	-	-	-	-	-	-
Unigene0076746	577	684.3333333	3.2309	3.2265	3.8195	4.0093	3.3963	3.5559	3.425633333	3.653833333	0.093040089	0.768881579	1	no	--	Signal transducer and activator of transcription C [Glycine soja]	-	-	-	-	-	-	-
Unigene0076780	1233	1364.666667	23.2309	28.2965	29.8294	35.2327	23.2	23.0479	27.11893333	27.1602	0.002193669	0.995462726	1	no	S1FA2	PREDICTED: DNA-binding protein S1FA-like [Ipomoea nil]	-	-	-	-	-	-	-
Unigene0076843	3746	3523.333333	39.6533	59.9334	40.2239	41.0925	39.0794	39.4709	46.60353333	39.88093333	-0.224740166	0.403171465	0.887557797	no	Os02g0194200	PREDICTED: zinc finger CCCH domain-containing protein 14-like [Ziziphus jujuba]	-	-	-	-	-	-	-
Unigene0076924	2074.666667	2029.666667	23.4463	36.5997	26.5846	24.561	26.5413	25.7858	28.87686667	25.62936667	-0.17211638	0.548111323	0.953458789	no	Os02g0194200	PREDICTED: zinc finger CCCH domain-containing protein 14-like [Populus euphratica]	-	-	-	-	-	-	-
Unigene0077021	524.3333333	555	3.9067	5.044	3.1335	4.5696	3.3639	3.7445	4.028066667	3.892666667	-0.049328751	0.887933322	1	no	WRKY74	PREDICTED: probable WRKY transcription factor 74 [Gossypium arboreum]	-	-	-	-	-	GO:0003676//nucleic acid binding;GO:1901363//heterocyclic compound binding;GO:0097159//organic cyclic compound binding;GO:0003677//DNA binding;GO:0005488//binding	GO:0009058//biosynthetic process;GO:0034641//cellular nitrogen compound metabolic process;GO:0034645//cellular macromolecule biosynthetic process;GO:0006807//nitrogen compound metabolic process;GO:0044271//cellular nitrogen compound biosynthetic process;GO:1901360//organic cyclic compound metabolic process;GO:0097659//nucleic acid-templated transcription;GO:0009987//cellular process;GO:0034654//n…
Unigene0077045	15069.66667	14501.33333	89.4058	88.0265	86.3444	66.829	79.2988	82.0698	87.92556667	76.06586667	-0.209033515	0.360786673	0.862254171	no	GAI	DPL [Pinus tabuliformis]	Environmental Information Processing	Signal transduction	ko04075//Plant hormone signal transduction	K14494	-	-	-
Unigene0077051	123	95.66666667	1.7466	2.7644	1.9207	1.4449	1.7847	1.3037	2.1439	1.5111	-0.504638478	0.224678196	0.783109	no	KNAT1	homeobox transcription factor KN4 [Picea mariana]	-	-	-	-	-	-	-
Unigene0077053	272.6666667	286	2.7162	3.2049	2.5018	2.8115	2.4773	2.7223	2.807633333	2.670366667	-0.072316686	0.835961804	1	no	KNAT1	homeobox transcription factor KN4 [Picea mariana]	-	-	-	-	-	-	-
Unigene0077055	4368.666667	4330.333333	32.1997	22.5701	27.531	21.3084	24.6283	27.0525	27.4336	24.32973333	-0.173223446	0.503140042	0.935536825	no	Os04g0671800	PREDICTED: zinc finger CCCH domain-containing protein 17-like [Nelumbo nucifera]	-	-	-	-	-	-	-
Unigene0077168	3021.666667	2665.333333	21.4133	34.8019	22.675	23.4877	20.3789	19.5788	26.29673333	21.14846667	-0.314330527	0.272645644	0.820591707	no	LBD37	LOB domain-containing protein 39 [Glycine soja]	-	-	-	-	-	-	GO:0001101//response to acid chemical;GO:0042221//response to chemical;GO:0050896//response to stimulus
Unigene0077340	1715.333333	1774.666667	14.4511	16.0493	11.5383	12.5309	13.3665	13.493	14.0129	13.13013333	-0.093873989	0.739620315	1	no	TCP8	PREDICTED: transcription factor TCP8 [Amborella trichopoda]	-	-	-	-	-	-	-
Unigene0077398	84.33333333	22	1.4391	3.0083	2.2727	0.4002	0.8831	0.2907	2.240033333	0.524666667	-2.094047161	0.000442422	0.012834115	yes	PTI5(ERF)	PREDICTED: pathogenesis-related genes transcriptional activator PTI5-like [Arachis ipaensis]	-	-	-	-	GO:0043227//membrane-bounded organelle;GO:0005622//intracellular;GO:0043229//intracellular organelle;GO:0044464//cell part;GO:0005623//cell;GO:0044424//intracellular part;GO:0043231//intracellular membrane-bounded organelle;GO:0043226//organelle	GO:0001071//nucleic acid binding transcription factor activity	GO:0034654//nucleobase-containing compound biosynthetic process;GO:0009059//macromolecule biosynthetic process;GO:0006725//cellular aromatic compound metabolic process;GO:1901576//organic substance biosynthetic process;GO:0090304//nucleic acid metabolic process;GO:0044238//primary metabolic process;GO:0006139//nucleobase-containing compound metabolic process;GO:0009058//biosynthetic process;GO:00…
Unigene0077605	48.66666667	63.66666667	0.4886	1.0186	0.7421	1.1616	0.7149	0.8155	0.749766667	0.897333333	0.259202317	0.618851037	0.975539434	no	AP1	MADS-box transcription factor family protein [Medicago truncatula]	-	-	-	-	-	-	-
Unigene0077802	640.6666667	900	4.5206	6.5744	3.7128	7.5941	5.8239	5.6118	4.935933333	6.343266667	0.361903084	0.297292683	0.837119451	no	GRF3	GRF1 [Pinus tabuliformis]	-	-	-	-	-	-	-
Unigene0077845	3176	3164.666667	28.3701	39.2658	30.9188	29.206	31.7797	27.8844	32.85156667	29.62336667	-0.149226562	0.569369339	0.960721025	no	--	Basic-leucine zipper (bZIP) transcription factor family protein isoform 7, partial [Theobroma cacao]	-	-	-	-	-	-	-
Unigene0077909	5154	3796	37.9522	32.3108	29.0255	23.7698	23.147	19.0131	33.09616667	21.97663333	-0.590693735	0.019530627	0.231057944	no	SPL7	PREDICTED: squamosa promoter-binding-like protein 7 [Glycine max]	-	-	-	-	-	-	-
Unigene0077932	210.3333333	238	4.9725	5.827	6.2318	6.8716	4.9106	5.63	5.6771	5.804066667	0.031909936	0.933196205	1	no	HOX19	CRHB10, partial [Ceratopteris richardii]	-	-	-	-	GO:0043231//intracellular membrane-bounded organelle;GO:0043229//intracellular organelle;GO:0044464//cell part;GO:0044424//intracellular part;GO:0005623//cell;GO:0043226//organelle;GO:0043227//membrane-bounded organelle;GO:0005622//intracellular	GO:0003677//DNA binding;GO:0003676//nucleic acid binding;GO:0001071//nucleic acid binding transcription factor activity;GO:0005488//binding;GO:0097159//organic cyclic compound binding;GO:1901363//heterocyclic compound binding	GO:0044249//cellular biosynthetic process;GO:0044260//cellular macromolecule metabolic process;GO:0006139//nucleobase-containing compound metabolic process;GO:0010467//gene expression;GO:0006725//cellular aromatic compound metabolic process;GO:0046483//heterocycle metabolic process;GO:0043170//macromolecule metabolic process;GO:0018130//heterocycle biosynthetic process;GO:0009987//cellular proces…
Unigene0077933	13.66666667	45.33333333	0.2457	0.431	0.3085	1.4712	0.6098	0.9205	0.3284	1.0005	1.607195135	0.013785131	0.182819556	no	HAT4	PREDICTED: homeobox-leucine zipper protein HAT4 isoform X1 [Eucalyptus grandis]	-	-	-	-	-	-	-
Unigene0078009	1151.333333	1322	8.2194	9.0407	9.1511	9.0355	9.5146	8.7419	8.803733333	9.097333333	0.047328269	0.868447098	1	no	TGA21	PREDICTED: transcription factor HBP-1b(c38) [Amborella trichopoda]	Environmental Information Processing	Signal transduction	ko04075//Plant hormone signal transduction	K14431	-	-	GO:0046483//heterocycle metabolic process;GO:1901360//organic cyclic compound metabolic process;GO:0044260//cellular macromolecule metabolic process;GO:0009987//cellular process;GO:0090304//nucleic acid metabolic process;GO:0032774//RNA biosynthetic process;GO:0044271//cellular nitrogen compound biosynthetic process;GO:0097659//nucleic acid-templated transcription;GO:0010467//gene expression;GO:0…
Unigene0078077	799	944	6.6561	7.7748	6.6924	6.9575	7.422	8.1592	7.0411	7.5129	0.093569067	0.757619816	1	no	ADA2	PREDICTED: transcriptional adapter ADA2 isoform X1 [Amborella trichopoda]	-	-	-	-	-	-	-
Unigene0078090	534	575.3333333	7.0299	11.1791	10.2672	8.5077	11.4613	7.6413	9.492066667	9.203433333	-0.044550075	0.901493295	1	no	WER	PREDICTED: transcription factor MYB82 isoform X1 [Camelina sativa]	-	-	-	-	-	-	-
Unigene0078121	0.666666667	5	0	0	0.1495	0.3292	0.4281	0.1912	0.049833333	0.316166667	2.665502289	0.177912736	0.728087952	no	DIVARICATA	Transcription factor MYB1R1 [Triticum urartu]	-	-	-	-	GO:0005623//cell;GO:0005622//intracellular;GO:0044424//intracellular part;GO:0044464//cell part;GO:0043231//intracellular membrane-bounded organelle;GO:0043229//intracellular organelle;GO:0043227//membrane-bounded organelle;GO:0043226//organelle	GO:0005488//binding	-
Unigene0078122	1277.666667	1274.666667	11.3758	9.5653	17.9918	13.1659	9.832	11.6519	12.97763333	11.54993333	-0.168142786	0.614690274	0.974248225	no	DIVARICATA	myb-related protein [Pinus sylvestris]	-	-	-	-	-	-	-
Unigene0078255	547.6666667	933	7.3809	8.1174	6.4023	12.4873	11.1247	10.1909	7.3002	11.26763333	0.626176628	0.045959616	0.392719294	no	GATA23	PREDICTED: GATA transcription factor 21 [Eucalyptus grandis]	-	-	-	-	-	-	-
Unigene0078262	104.6666667	166.3333333	0.8942	0.6192	0.8953	1.7968	0.7521	0.9077	0.8029	1.1522	0.521098944	0.253200142	0.811849343	no	BHLH	transcription factor bHLH-2 [Picea abies]	-	-	-	-	-	-	-
Unigene0078323	617.3333333	988.3333333	5.0202	4.0105	5.9945	6.84	6.194	8.4768	5.0084	7.170266667	0.517676986	0.114088743	0.616474936	no	CIGR2	SCL10 [Pinus radiata]	-	-	-	-	-	-	GO:0034645//cellular macromolecule biosynthetic process;GO:0071704//organic substance metabolic process;GO:1901576//organic substance biosynthetic process;GO:0034641//cellular nitrogen compound metabolic process;GO:0006139//nucleobase-containing compound metabolic process;GO:0044249//cellular biosynthetic process;GO:0090304//nucleic acid metabolic process;GO:0007154//cell communication;GO:0010467…
Unigene0078333	737.3333333	613	5.9021	4.0806	5.2331	3.3634	3.6404	4.3134	5.071933333	3.7724	-0.427053125	0.191790241	0.745456292	no	--	Sequence-specific DNA binding transcription factors [Theobroma cacao]	-	-	-	-	-	-	-
Unigene0078401	530	460.6666667	2.904	1.9176	2.6953	1.7778	2.0217	2.0309	2.505633333	1.943466667	-0.366542947	0.277980255	0.825597198	no	NLP9	PREDICTED: protein NLP9 [Nelumbo nucifera]	-	-	-	-	-	-	-
Unigene0078567	1273.666667	1057	20.7726	18.1904	21.5336	15.678	13.8539	15.5797	20.16553333	15.0372	-0.423355607	0.143598949	0.676248588	no	J	MADS5 [Pinus tabuliformis]	-	-	-	-	-	-	-
Unigene0078671	132.3333333	54.66666667	1.9101	3.2576	5.3293	1.9308	1.2034	0.7573	3.499	1.297166667	-1.431578808	0.007529464	0.119403021	no	ATHB-13	homeobox-leucine zipper-like protein [Picea glauca]	-	-	-	-	-	-	-
Unigene0078700	135	173	1.4058	1.3074	1.3957	1.5126	2.0112	1.19	1.369633333	1.571266667	0.198138329	0.6104073	0.973188477	no	BHLH10	PREDICTED: transcription factor bHLH91 [Amborella trichopoda]	-	-	-	-	-	-	-
Unigene0078701	0	0	0	0	0	0	0	0	0.001	0.001	0	notest	notest	notest	BHLH10	PREDICTED: transcription factor EAT1-like [Nelumbo nucifera]	-	-	-	-	-	-	-
Unigene0078715	705.6666667	453.3333333	9.4204	14.9559	8.03	6.3607	8.4666	4.0965	10.8021	6.307933333	-0.776072491	0.051334658	0.417935284	no	ERF1A	AP2/EREBP family transcription factor-like protein 13 [Prunus pseudocerasus]	-	-	-	-	-	-	-
Unigene0078737	932.3333333	1123	7.915	6.4595	7.3777	7.8201	7.5069	8.2024	7.250733333	7.843133333	0.113303211	0.701550007	0.995496164	no	GATA26	PREDICTED: GATA transcription factor 26 isoform X2 [Nicotiana attenuata]	-	-	-	-	-	-	-
Unigene0078770	446.6666667	518.6666667	5.7667	4.4226	5.2551	5.2378	4.8361	6.0258	5.148133333	5.366566667	0.059949981	0.857384857	1	no	RF2b	PREDICTED: transcription factor VIP1 [Amborella trichopoda]	-	-	-	-	-	-	-
Unigene0078794	1104	1286	6.6844	5.5795	5.5155	6.749	6.3676	5.5314	5.926466667	6.216	0.068814271	0.815088326	1	no	APUM12	PREDICTED: pumilio homolog 12 [Jatropha curcas]	-	-	-	-	-	-	-
Unigene0078851	992.6666667	648.3333333	9.628	5.8219	13.5093	7.4602	5.1316	4.2339	9.653066667	5.608566667	-0.783355222	0.045618336	0.390777385	no	APL	PREDICTED: myb family transcription factor APL-like [Daucus carota subsp. sativus] [Daucus carota]	-	-	-	-	-	GO:0001071//nucleic acid binding transcription factor activity	GO:0009566//fertilization;GO:0051704//multi-organism process;GO:0044699//single-organism process;GO:0000003//reproduction;GO:0019953//sexual reproduction;GO:0022414//reproductive process;GO:0044702//single organism reproductive process;GO:0044703//multi-organism reproductive process
Unigene0078893	13121	14056	62.0937	43.5399	56.4648	49.3632	52.8611	53.0828	54.0328	51.76903333	-0.061746065	0.796677738	1	no	BLH1	PREDICTED: BEL1-like homeodomain protein 1 [Amborella trichopoda]	-	-	-	-	-	-	-
Unigene0078897	1394.666667	1804.333333	6.7394	6.4078	4.8075	7.5046	8.6055	4.8547	5.9849	6.988266667	0.22360752	0.486075172	0.929742655	no	CDF2	Dof10 [Pinus pinaster]	-	-	-	-	-	-	-
Unigene0078921	35.66666667	32.33333333	0.8683	1.443	0.6965	0.6133	1.0652	0.8004	1.0026	0.8263	-0.279008566	0.638005527	0.982856011	no	--	basic helix-loop-helix transcription factor [Salvia miltiorrhiza]	-	-	-	-	-	-	-
Unigene0078940	1529.666667	1954.666667	13.9612	11.7074	13.4022	16.062	13.6709	15.1689	13.0236	14.96726667	0.200682484	0.466665317	0.9229035	no	OCP3	PREDICTED: protein OVEREXPRESSOR OF CATIONIC PEROXIDASE 3 [Oryza brachyantha]	-	-	-	-	-	-	-
Unigene0078956	180	114	3.4348	4.9356	4.4796	2.5404	2.857	1.942	4.283333333	2.446466667	-0.808034328	0.037863892	0.349527114	no	MYB4	R2R3-MYB transcription factor MYB5, partial [Pinus taeda]	-	-	-	-	-	-	-
Unigene0078957	209	156.6666667	3.3381	4.4374	4.6709	2.9086	2.6677	2.8343	4.1488	2.803533333	-0.565447888	0.121591923	0.633765619	no	MYB308	R2R3-MYB transcription factor MYB5 [Picea glauca]	-	-	-	-	-	-	-
Unigene0078958	5.666666667	2.333333333	0.5723	0	0.2495	0	0.2041	0.0851	0.273933333	0.0964	-1.506719778	0.416535151	0.895112582	no	MYB308	R2R3 Myb protein, partial [Zea mays]	-	-	-	-	-	GO:0005488//binding	GO:1901576//organic substance biosynthetic process;GO:0009058//biosynthetic process;GO:0090304//nucleic acid metabolic process;GO:0031323//regulation of cellular metabolic process;GO:0071704//organic substance metabolic process;GO:0044238//primary metabolic process;GO:0009628//response to abiotic stimulus;GO:0016070//RNA metabolic process;GO:0006351//transcription, DNA-templated;GO:0009059//macro…
Unigene0079008	141.6666667	169.3333333	2.7709	1.8398	3.4551	2.5003	3.1512	2.895	2.6886	2.848833333	0.083516089	0.839302502	1	no	--	PREDICTED: transcription factor BHLH148-like [Phoenix dactylifera]	-	-	-	-	-	-	-
Unigene0079009	5522	6100.333333	35.2172	32.4454	35.5623	34.5805	34.9291	32.9439	34.4083	34.15116667	-0.010821751	0.963243873	1	no	PHL1	PREDICTED: myb family transcription factor PHL6 isoform X1 [Nelumbo nucifera]	-	-	-	-	-	-	-
Unigene0079072	1029.666667	1177.666667	5.9285	4.6614	5.0469	4.4439	5.7352	5.8407	5.212266667	5.339933333	0.034910835	0.909276711	1	no	Os07g0563300	PREDICTED: B3 domain-containing protein Os07g0679700-like isoform X1 [Nelumbo nucifera]	-	-	-	-	-	-	-
Unigene0079196	1591.333333	1758	12.8278	11.0213	16.8621	13.9165	13.0166	13.2458	13.5704	13.39296667	-0.01898768	0.948931184	1	no	APL	Myb_DNA-binding domain-containing protein/Myb_CC_LHEQLE domain-containing protein [Cephalotus follicularis]	-	-	-	-	-	-	-
Unigene0079254	115	124	1.4721	1.4578	1.0931	1.9468	1.0466	0.9637	1.341	1.319033333	-0.023828214	0.963143985	1	no	FLL	LEAFY-like protein, partial [Taxus globosa]	-	-	-	-	-	-	-
Unigene0079427	360.6666667	390	3.2017	2.6441	3.2174	3.012	2.9283	2.8486	3.021066667	2.929633333	-0.044337909	0.896014749	1	no	TCX5	PREDICTED: protein tesmin/TSO1-like CXC 5 [Vitis vinifera]	-	-	-	-	-	-	-
Unigene0079469	942.6666667	1229.333333	13.4813	7.5627	8.8828	9.1775	14.8886	10.6845	9.9756	11.58353333	0.215599864	0.536593231	0.949977521	no	NAC68	PREDICTED: NAC domain-containing protein 68-like isoform X2 [Phoenix dactylifera]	-	-	-	-	-	-	-
Unigene0079484	53.66666667	100.3333333	0.922	1.216	0.8268	1.4908	1.1756	2.3834	0.988266667	1.683266667	0.768291464	0.10791366	0.601901016	no	MYB4	R2R3-MYB transcription factor MYB12 [Picea glauca]	-	-	-	-	-	-	-
Unigene0079593	1925	1808.666667	9.3956	12.9704	11.8394	9.8704	8.5721	10.6418	11.4018	9.694766667	-0.233983519	0.408986036	0.890761785	no	--	GARP2 [Taxus wallichiana var. chinensis] [Taxus wallichiana]	-	-	-	-	-	-	-
Unigene0079651	360	574.3333333	11.8201	11.6173	7.6106	13.5918	20.7856	10.2564	10.34933333	14.87793333	0.523636301	0.178461152	0.728873187	no	ERF15	Ethylene-responsive transcription factor 1B [Zostera marina]	Environmental Information Processing	Signal transduction	ko04075//Plant hormone signal transduction	K14516	-	-	-
Unigene0079652	12.66666667	22.66666667	0.6463	0.5025	0.1068	0.3447	1.1936	0.4855	0.418533333	0.6746	0.68868979	0.421950954	0.898647149	no	ERF1B	PREDICTED: pathogenesis-related genes transcriptional activator PTI5-like [Nelumbo nucifera]	Environmental Information Processing	Signal transduction	ko04075//Plant hormone signal transduction	K14516	-	-	-
Unigene0079653	63.33333333	88.66666667	1.3035	0.9323	1.2294	1.1163	1.917	1.2774	1.155066667	1.4369	0.31498354	0.488023011	0.930139408	no	ERF1A	PREDICTED: pathogenesis-related genes transcriptional activator PTI5-like [Ziziphus jujuba]	Environmental Information Processing	Signal transduction	ko04075//Plant hormone signal transduction	K14516	-	-	-
Unigene0079704	277	266	4.9406	7.7969	4.9189	6.6572	5.5326	3.2812	5.885466667	5.157	-0.190624768	0.643007192	0.984668346	no	HOX32	class III homeodomain-leucine zipper protein C3HDZ1 [Taxus globosa]	-	-	-	-	-	-	-
Unigene0079721	11198.33333	11700.66667	31.3908	26.4554	31.7739	29.4975	27.2538	27.3036	29.87336667	28.0183	-0.092490412	0.687208731	0.995118446	no	Os11g0472000	PREDICTED: zinc finger CCCH domain-containing protein 12 isoform X2 [Nelumbo nucifera]	-	-	-	-	-	-	-
Unigene0079769	1192.666667	1094.666667	11.5429	13.7037	12.8922	10.6442	11.4256	9.4766	12.71293333	10.51546667	-0.273784074	0.349212011	0.854463032	no	--	transcription regulator [Medicago truncatula]	-	-	-	-	-	-	-
Unigene0079848	276.3333333	326	4.5734	8.955	4.2303	5.5975	6.9966	6.563	5.919566667	6.3857	0.109353207	0.790458902	1	no	ERF056	PREDICTED: ethylene-responsive transcription factor ERF062 [Nicotiana attenuata]	-	-	-	-	-	-	-
Unigene0079866	285.6666667	412	6.7415	4.6592	5.1373	4.4337	7.9545	8.899	5.512666667	7.095733333	0.364201423	0.35227614	0.854494371	no	WRKY51	PREDICTED: probable WRKY transcription factor 51 [Gossypium hirsutum]	-	-	-	-	-	-	-
Unigene0079867	268.3333333	598	6.2369	3.5736	3.6607	3.9085	11.6888	11.0821	4.4904	8.893133333	0.985847851	0.03332675	0.3241255	no	WRKY71	PREDICTED: probable WRKY transcription factor 51 [Gossypium hirsutum]	-	-	-	-	-	-	-
Unigene0079906	325.3333333	315.3333333	2.6271	2.7829	2.5074	2.8603	1.8397	2.2627	2.639133333	2.3209	-0.185379877	0.599174306	0.971230172	no	POSF21	PREDICTED: transcription factor RF2b-like [Nelumbo nucifera]	-	-	-	-	-	-	-
Unigene0079954	426.6666667	289	3.4464	3.6053	2.5425	1.9923	2.4134	1.4656	3.198066667	1.9571	-0.70848254	0.052977999	0.424913776	no	At2g41710	WRI2 [Larix gmelinii var. olgensis x Larix kaempferi] [Larix gmelinii]	-	-	-	-	-	-	-
Unigene0079961	331.3333333	766.3333333	3.9274	2.8304	5.4875	10.9908	5.0052	9.39	4.081766667	8.462	1.051804972	0.010629389	0.152969071	no	NAC025	PREDICTED: NAC transcription factor 25 [Amborella trichopoda]	-	-	-	-	GO:0005623//cell;GO:0043231//intracellular membrane-bounded organelle;GO:0043226//organelle;GO:0043229//intracellular organelle;GO:0005622//intracellular;GO:0043227//membrane-bounded organelle;GO:0044464//cell part;GO:0044424//intracellular part	GO:0005488//binding	GO:0044238//primary metabolic process;GO:1901576//organic substance biosynthetic process;GO:0009987//cellular process;GO:0048856//anatomical structure development;GO:0009059//macromolecule biosynthetic process;GO:0008152//metabolic process;GO:0065007//biological regulation;GO:0090304//nucleic acid metabolic process;GO:1901700//response to oxygen-containing compound;GO:0001101//response to acid ch…
Unigene0079962	1686	1964.666667	10.436	5.5786	9.2731	8.7513	7.4955	10.0558	8.429233333	8.767533333	0.056769591	0.858892653	1	no	ABF1	PREDICTED: ABSCISIC ACID-INSENSITIVE 5-like protein 5 isoform X2 [Nelumbo nucifera]	Environmental Information Processing	Signal transduction	ko04075//Plant hormone signal transduction	K14432	-	-	-
Unigene0080043	1152	1139.666667	7.6129	6.33	7.2967	6.5163	6.4892	5.8502	7.079866667	6.285233333	-0.171755886	0.554952705	0.955791812	no	NFXL2	PREDICTED: NF-X1-type zinc finger protein NFXL2 isoform X1 [Vitis vinifera]	-	-	-	-	-	-	-
Unigene0080044	4	3.666666667	0.1994	0.4297	0.1391	0.49	0.0569	0.1186	0.256066667	0.221833333	-0.207043298	1	1	no	NFXL2	NF-X1-type zinc finger protein NFXL2 [Anthurium amnicola]	-	-	-	-	-	-	-
Unigene0080057	393.6666667	762.6666667	7.5147	10.6866	4.1457	8.5596	13.5317	17.4466	7.449	13.1793	0.823155078	0.055196086	0.434515026	no	ZAT9	PREDICTED: zinc finger protein ZAT9-like [Gossypium hirsutum]	-	-	-	-	-	-	-
Unigene0080058	51.33333333	164.3333333	1.5179	1.7519	0.2482	2.4036	2.1924	5.8184	1.172666667	3.471466667	1.565752337	0.017531869	0.214990179	no	ZAT4	PREDICTED: zinc finger protein ZAT9-like [Gossypium arboreum]	-	-	-	-	-	-	-
Unigene0080108	1265.666667	1404	10.87	10.3959	9.7857	10.2741	10.1976	10.5768	10.35053333	10.3495	-0.000144037	1	1	no	WRKY20	PREDICTED: probable WRKY transcription factor 20 [Nelumbo nucifera]	-	-	-	-	-	-	-
Unigene0080109	618.3333333	1238.666667	3.5337	2.9633	3.0902	3.8864	4.3129	9.0696	3.195733333	5.7563	0.848994755	0.026933203	0.284030609	no	WRKY34	PREDICTED: WRKY transcription factor SUSIBA2-like [Ziziphus jujuba]	-	-	-	-	-	-	-
Unigene0080123	362.3333333	371.3333333	4.3461	4.9746	6.7431	7.0893	5.2994	2.4032	5.3546	4.930633333	-0.119005836	0.787769054	1	no	RL1	PREDICTED: protein RADIALIS-like 3 isoform X2 [Nelumbo nucifera]	-	-	-	-	-	-	-
Unigene0080178	2297.666667	4463	17.1193	14.144	14.1383	23.3873	28.3685	27.4087	15.13386667	26.38816667	0.802110482	0.00184123	0.0411721	no	ARF6	PREDICTED: auxin response factor 6-like isoform X1 [Nelumbo nucifera]	-	-	-	-	-	-	-
Unigene0080199	5949	6253.333333	46.4454	52.7164	43.8458	42.549	47.2222	45.9682	47.6692	45.24646667	-0.075252278	0.750128968	1	no	GATA28	PREDICTED: GATA transcription factor 28 isoform X1 [Nelumbo nucifera]	-	-	-	-	-	GO:0005488//binding	-
Unigene0080251	277.3333333	209.3333333	2.7932	4.5695	3.7028	1.599	3.1914	2.7215	3.6885	2.503966667	-0.558818879	0.170753322	0.71903562	no	C1	MYB-like protein [Taxus globosa]	-	-	-	-	-	-	-
Unigene0080320	1601	1714	11.0163	14.634	11.0695	11.1404	12.3914	12.0596	12.23993333	11.8638	-0.045029518	0.874630553	1	no	DPBF3	PREDICTED: ABSCISIC ACID-INSENSITIVE 5-like protein 2 [Ziziphus jujuba]	Environmental Information Processing	Signal transduction	ko04075//Plant hormone signal transduction	K14432	-	-	-
Unigene0080402	14.66666667	120.6666667	0.7206	0.4189	0	2.5327	2.1016	3.9761	0.379833333	2.870133333	2.917679336	0.000398105	0.011817749	yes	ERF016	PREDICTED: ethylene-responsive transcription factor ERF017-like [Gossypium raimondii]	-	-	-	-	-	-	-
Unigene0080482	206.3333333	370.6666667	1.8467	2.5917	1.9653	4.2194	4.1547	2.0522	2.134566667	3.475433333	0.70324965	0.082426273	0.530201961	no	GATA12	GATA transcription factor 1 [Marchantia polymorpha]	-	-	-	-	-	-	-
Unigene0080540	1313	1483	9.7675	7.8537	7.9517	8.4903	9.3043	8.1506	8.5243	8.6484	0.020851884	0.942688416	1	no	IDD2	PREDICTED: zinc finger protein JACKDAW [Nelumbo nucifera]	-	-	-	-	-	-	-
Unigene0080541	633	724.6666667	4.0203	3.829	3.4663	3.7372	3.8703	4.0716	3.771866667	3.893033333	0.045616019	0.883793304	1	no	IDD1	PREDICTED: zinc finger protein JACKDAW [Nelumbo nucifera]	-	-	-	-	-	-	-
Unigene0080594	1305.333333	1078	10.8538	14.3145	11.9518	8.1062	10.6107	8.9248	12.37336667	9.2139	-0.425354251	0.156998417	0.698263774	no	PTL	PREDICTED: trihelix transcription factor GTL1-like [Nelumbo nucifera]	-	-	-	-	-	-	-
Unigene0080617	1125.666667	1067.333333	6.1377	7.0334	6.8688	4.7454	6.1183	6.2159	6.679966667	5.6932	-0.230601122	0.440799218	0.907583003	no	BLH2	PREDICTED: homeobox protein BEL1 homolog isoform X2 [Juglans regia]	-	-	-	-	-	-	-
Unigene0080620	20	13.33333333	0.5055	0.9801	1.5338	0.5589	0.4759	0.7666	1.006466667	0.600466667	-0.745143326	0.335286736	0.850206938	no	ZFN1	PREDICTED: zinc finger CCCH domain-containing protein 3 [Fragaria vesca subsp. vesca] [Fragaria vesca]	-	-	-	-	-	-	-
Unigene0080621	0	2	0	0	0	0.441	0	0	0.001	0.147	7.199672345	0.410352657	0.890761785	no	At2g47850	Zinc finger C-x8-C-x5-C-x3-H type family protein isoform 2 [Theobroma cacao]	-	-	-	-	-	-	-
Unigene0080622	5	5.333333333	0.3073	0	0.643	0.5662	0.3156	0	0.316766667	0.293933333	-0.107931552	1	1	no	ZFN1	Zinc finger C-x8-C-x5-C-x3-H type family protein isoform 2 [Theobroma cacao]	-	-	-	-	-	-	-
Unigene0080624	85.66666667	77	6.5817	8.9593	5.6504	5.6749	6.7887	4.8174	7.0638	5.760333333	-0.294292197	0.50491396	0.93643602	no	At2g47850	Zinc finger C-x8-C-x5-C-x3-H type family protein isoform 1 [Theobroma cacao]	-	-	-	-	-	-	-
Unigene0080625	7.333333333	5.333333333	0.3099	0.6866	0.3242	0.2855	0.3183	0.2764	0.440233333	0.2934	-0.585399516	0.604588459	0.971452371	no	ZFN1	PREDICTED: zinc finger CCCH domain-containing protein 3 [Fragaria vesca subsp. vesca] [Fragaria vesca]	-	-	-	-	-	-	-
Unigene0080627	6	6	0.2377	0.0439	0.1492	0.1533	0.1221	0.106	0.1436	0.127133333	-0.175713406	0.942131862	1	no	Os01g0257400	Zinc finger, CCCH-type [Cynara cardunculus var. scolymus] [Cynara cardunculus]	-	-	-	-	-	-	-
Unigene0080673	686.6666667	741	6.773	8.1751	7.8988	6.0325	8.8975	7.196	7.615633333	7.375333333	-0.046255765	0.887940549	1	no	RAV2	PREDICTED: B3 domain-containing protein Os03g0120900-like [Nelumbo nucifera]	-	-	-	-	-	-	-
Unigene0080901	763.3333333	713.3333333	5.4717	5.8328	5.5997	4.8479	4.8176	4.5739	5.634733333	4.746466667	-0.247493384	0.412647523	0.892752737	no	--	PREDICTED: zinc finger protein ZAT4-like [Raphanus sativus]	-	-	-	-	-	-	-
Unigene0080999	100.6666667	116.6666667	1.1043	0.1954	1.531	1.0343	1.0712	0.7552	0.943566667	0.953566667	0.015209352	0.98277725	1	no	NAC086	NAC domain-containing protein 78 [Morus notabilis]	-	-	-	-	-	-	-
Unigene0081020	1968	1749	17.3987	17.0112	18.6127	13.762	14.5182	14.0463	17.6742	14.10883333	-0.325046219	0.223612663	0.781852791	no	LUX	PREDICTED: transcription factor PCL1 [Vitis vinifera]	-	-	-	-	-	-	-
Unigene0081023	2607	1908.333333	10.3444	14.7139	12.4687	8.0002	8.7909	8.034	12.509	8.275033333	-0.596129433	0.029332527	0.299729847	no	ASIL2	PREDICTED: trihelix transcription factor ASIL2-like [Nelumbo nucifera]	-	-	-	-	-	-	GO:0032501//multicellular organismal process;GO:0044699//single-organism process;GO:0044767//single-organism developmental process;GO:0032502//developmental process;GO:0044707//single-multicellular organism process;GO:0007275//multicellular organism development
Unigene0081100	82.33333333	125.3333333	1.4405	1.6356	1.6702	1.6679	2.4659	2.3443	1.5821	2.159366667	0.448767447	0.273247617	0.821181242	no	MYB3	MYB-like protein [Taxus globosa]	-	-	-	-	-	-	-
Unigene0081101	205.3333333	122	2.7937	4.2388	4.8648	1.1159	2.2907	2.9104	3.965766667	2.105666667	-0.913322725	0.045983756	0.392801272	no	MYB12	MYB-like protein [Taxus globosa]	-	-	-	-	-	-	-
Unigene0081212	166.3333333	118.6666667	3.0504	1.5571	2.7005	1.216	1.5815	1.8315	2.436	1.543	-0.658776071	0.119562863	0.630806859	no	Os03g0622200	PREDICTED: B3 domain-containing protein LOC_Os12g40080-like isoform X4 [Nelumbo nucifera]	-	-	-	-	-	-	-
Unigene0081368	520.6666667	409.6666667	4.9471	5.2264	4.8794	3.8731	3.9831	2.817	5.017633333	3.557733333	-0.49604867	0.136651599	0.664572407	no	DOF5.3	PREDICTED: dof zinc finger protein DOF5.7 [Jatropha curcas]	-	-	-	-	-	-	-
Unigene0081395	117	156	2.9522	4.7567	2.1501	2.8532	3.7654	5.3962	3.286333333	4.004933333	0.285299407	0.535573871	0.949346816	no	ERF10	PREDICTED: ethylene-responsive transcription factor 4-like [Raphanus sativus]	-	-	-	-	-	-	-
Unigene0081396	135.3333333	172.6666667	3.0203	3.5632	1.7117	2.8212	3.0518	3.7795	2.765066667	3.2175	0.218625884	0.602430524	0.971452371	no	ERF4	ERF12 [Taxus wallichiana var. chinensis] [Taxus wallichiana]	-	-	-	-	-	-	-
Unigene0081416	256.3333333	269.3333333	2.759	2.8338	2.8172	3.3381	2.5036	2.1449	2.803333333	2.6622	-0.074524341	0.841466341	1	no	WIP2	PREDICTED: zinc finger protein WIP2 [Amborella trichopoda]	-	-	-	-	-	-	-
Unigene0081465	10969.66667	10539	39.6857	33.8307	38.5613	30.8045	34.4815	31.2354	37.35923333	32.1738	-0.215578508	0.34808602	0.854463032	no	UNE10	phytochrome interacting factor 3 [Arachis hypogaea]	Organismal Systems;Environmental Information Processing	Environmental adaptation;Signal transduction	ko04075//Plant hormone signal transduction;ko04712//Circadian rhythm - plant	K12126	-	-	-
Unigene0081466	618.3333333	437.3333333	5.3289	5.3388	4.0927	2.9546	3.4588	3.0126	4.920133333	3.142	-0.647014232	0.047697813	0.401093149	no	PTL	PREDICTED: trihelix transcription factor PTL [Vitis vinifera]	-	-	-	-	-	-	-
Unigene0081518	80.33333333	104	1.2782	2.012	1.6662	2.1814	1.7217	1.9253	1.652133333	1.9428	0.233807269	0.58090679	0.964663367	no	WOX8	HD transcription factor [Ginkgo biloba]	-	-	-	-	-	-	-
Unigene0081534	1207	1496	6.5446	6.7032	6.2531	7.9822	6.429	7.4414	6.5003	7.2842	0.164264232	0.563312176	0.959222618	no	ARF23	PREDICTED: auxin response factor 2 [Vitis vinifera]	-	-	-	-	-	-	-
Unigene0081573	4583	4052.333333	48.0417	51.3567	46.6993	35.1575	43.1859	37.9197	48.69923333	38.75436667	-0.329540184	0.176913144	0.726591496	no	ASIL2	PREDICTED: trihelix transcription factor ASIL2-like isoform X1 [Nelumbo nucifera]	-	-	-	-	-	-	-
Unigene0081633	39.66666667	174.3333333	0.5518	1.6738	0.7972	2.5174	4.1827	5.4611	1.0076	4.053733333	2.00832816	0.000196063	0.006512388	yes	ERF011	DREB group protein [Ammopiptanthus mongolicus]	-	-	-	-	-	-	-
Unigene0081643	78	85.66666667	0.6026	1.4414	1.089	1.4509	0.8674	0.8307	1.044333333	1.049666667	0.007348988	1	1	no	SMB	PREDICTED: protein SOMBRERO-like [Sesamum indicum]	-	-	-	-	-	-	-
Unigene0081692	2020	2064.666667	27.778	23.8376	27.8725	24.6278	23.4121	24.9094	26.49603333	24.31643333	-0.123844759	0.641113622	0.983728474	no	WHY1	PREDICTED: single-stranded DNA-binding protein WHY1, chloroplastic-like [Camelina sativa]	-	-	-	-	GO:0044424//intracellular part;GO:0043229//intracellular organelle;GO:0005737//cytoplasm;GO:0044444//cytoplasmic part;GO:0009536//plastid;GO:0043226//organelle;GO:0005623//cell;GO:0043232//intracellular non-membrane-bounded organelle;GO:0043228//non-membrane-bounded organelle;GO:0005694//chromosome;GO:0043227//membrane-bounded organelle;GO:0000229//cytoplasmic chromosome;GO:0044464//cell part;GO:…	GO:0003676//nucleic acid binding;GO:0043566//structure-specific DNA binding;GO:0003677//DNA binding;GO:0005488//binding;GO:0097159//organic cyclic compound binding;GO:1901363//heterocyclic compound binding;GO:0043565//sequence-specific DNA binding	GO:0044763//single-organism cellular process;GO:0044238//primary metabolic process;GO:0034645//cellular macromolecule biosynthetic process;GO:0044237//cellular metabolic process;GO:0009987//cellular process;GO:0032200//telomere organization;GO:0006725//cellular aromatic compound metabolic process;GO:0044249//cellular biosynthetic process;GO:0051276//chromosome organization;GO:0034641//cellular ni…
Unigene0081693	150	139	3.4472	3.9837	2.6275	2.8814	3.0091	2.566	3.3528	2.818833333	-0.250268247	0.514313572	0.939311489	no	WHY1	single-stranded DNA-binding protein WHY1, chloroplastic-like isoform X2 [Asparagus officinalis]	-	-	-	-	GO:0000229//cytoplasmic chromosome;GO:0044464//cell part;GO:0009536//plastid;GO:0005737//cytoplasm;GO:0043229//intracellular organelle;GO:0044444//cytoplasmic part;GO:0043231//intracellular membrane-bounded organelle;GO:0005622//intracellular;GO:0043228//non-membrane-bounded organelle;GO:0005623//cell;GO:0005694//chromosome;GO:0043232//intracellular non-membrane-bounded organelle;GO:0043227//memb…	GO:0097159//organic cyclic compound binding;GO:0043565//sequence-specific DNA binding;GO:0003676//nucleic acid binding;GO:0005488//binding;GO:0003677//DNA binding;GO:1901363//heterocyclic compound binding;GO:0043566//structure-specific DNA binding	GO:0090304//nucleic acid metabolic process;GO:0009058//biosynthetic process;GO:0034641//cellular nitrogen compound metabolic process;GO:0008152//metabolic process;GO:0044711//single-organism biosynthetic process;GO:0016043//cellular component organization;GO:0006259//DNA metabolic process;GO:0044763//single-organism cellular process;GO:0043170//macromolecule metabolic process;GO:0046483//heterocy…
Unigene0081696	400.3333333	522.3333333	2.7596	3.7759	2.4394	3.6199	2.9769	4.0778	2.991633333	3.5582	0.250214241	0.475802245	0.927063136	no	MYC2	bHLH transcription factor [Taxus mairei]	Environmental Information Processing	Signal transduction	ko04075//Plant hormone signal transduction	K13422	-	-	-
Unigene0081718	643.3333333	758.3333333	4.7134	5.052	4.356	4.9999	5.1413	4.8877	4.707133333	5.009633333	0.089856294	0.770453932	1	no	ERF053	PREDICTED: ethylene-responsive transcription factor ERF054 [Amborella trichopoda]	-	-	-	-	-	-	-
Unigene0081727	339.3333333	341	2.6366	2.5534	2.9358	2.8153	2.0841	2.4598	2.7086	2.453066667	-0.142960913	0.675849152	0.993156948	no	Os01g0723500	PREDICTED: B3 domain-containing protein Os01g0723500 isoform X2 [Amborella trichopoda]	-	-	-	-	-	-	-
Unigene0081770	2044.333333	1963	9.7579	7.509	7.4144	6.8174	6.7308	7.7782	8.2271	7.1088	-0.210777933	0.446428128	0.910584885	no	NAC078	PREDICTED: NAC domain-containing protein 78 [Amborella trichopoda]	-	-	-	-	-	-	GO:0034641//cellular nitrogen compound metabolic process;GO:0071704//organic substance metabolic process;GO:0090304//nucleic acid metabolic process;GO:0009058//biosynthetic process;GO:1901576//organic substance biosynthetic process;GO:0019438//aromatic compound biosynthetic process;GO:0044249//cellular biosynthetic process;GO:0097659//nucleic acid-templated transcription;GO:1901360//organic cycli…
Unigene0081793	1270.666667	1549.666667	12.734	16.2279	13.8373	14.5514	16.8419	15.7198	14.2664	15.70436667	0.138544433	0.628544195	0.979574072	no	DPB	PREDICTED: transcription factor-like protein DPB [Ipomoea nil]	-	-	-	-	-	-	-
Unigene0081825	355	415.6666667	3.3485	4.3945	3.9957	3.9723	4.4475	3.9761	3.9129	4.131966667	0.078590375	0.81633983	1	no	SHH2	Protein SAWADEE HOMEODOMAIN [Ananas comosus]	-	-	-	-	-	-	-
Unigene0081888	73.33333333	69.66666667	1.0667	0.5145	1.9656	1.3934	0.7358	0.8521	1.182266667	0.993766667	-0.250576424	0.670317149	0.991365921	no	CPSF30	YTH domain-containing protein [Cephalotus follicularis]	Genetic Information Processing	Translation	ko03015//mRNA surveillance pathway	K14404	GO:0005623//cell;GO:0044464//cell part;GO:0005622//intracellular;GO:0043227//membrane-bounded organelle;GO:0043231//intracellular membrane-bounded organelle;GO:0043229//intracellular organelle;GO:0044424//intracellular part;GO:0043226//organelle	GO:0003676//nucleic acid binding;GO:0003824//catalytic activity;GO:0097159//organic cyclic compound binding;GO:0016788//hydrolase activity, acting on ester bonds;GO:0004518//nuclease activity;GO:1901363//heterocyclic compound binding;GO:0016787//hydrolase activity;GO:0005515//protein binding;GO:0005488//binding;GO:0004519//endonuclease activity	GO:0019219//regulation of nucleobase-containing compound metabolic process;GO:0044763//single-organism cellular process;GO:0050684//regulation of mRNA processing;GO:0050789//regulation of biological process;GO:1903311//regulation of mRNA metabolic process;GO:0010468//regulation of gene expression;GO:0006950//response to stress;GO:0007049//cell cycle;GO:0080090//regulation of primary metabolic pro…
Unigene0081922	991.6666667	993.3333333	5.7067	6.2187	6.0414	5.4888	5.1254	5.6205	5.988933333	5.411566667	-0.146252753	0.617433014	0.975021195	no	ARR2	PREDICTED: two-component response regulator ORR21-like [Nelumbo nucifera]	Environmental Information Processing	Signal transduction	ko04075//Plant hormone signal transduction	K14491	-	GO:1901363//heterocyclic compound binding;GO:0097159//organic cyclic compound binding;GO:0016740//transferase activity;GO:0016772//transferase activity, transferring phosphorus-containing groups;GO:0003824//catalytic activity;GO:0005488//binding;GO:0003676//nucleic acid binding	GO:0050794//regulation of cellular process;GO:0007165//signal transduction;GO:0065007//biological regulation;GO:0044699//single-organism process;GO:0044237//cellular metabolic process;GO:0044700//single organism signaling;GO:0008152//metabolic process;GO:0009987//cellular process;GO:0006793//phosphorus metabolic process;GO:0044763//single-organism cellular process;GO:0007154//cell communication;G…
Unigene0081923	1169.666667	1084	7.5487	8.8802	9.0771	7.4633	7.6962	6.1163	8.502	7.091933333	-0.261623285	0.37863126	0.871562364	no	TCP15	PREDICTED: transcription factor TCP8 [Theobroma cacao]	-	-	-	-	-	-	-
Unigene0081964	3531.333333	3662	33.2434	30.5027	25.7926	25.2651	32.919	25.3441	29.84623333	27.84273333	-0.100248023	0.701444793	0.995496164	no	CPRF2	PREDICTED: light-inducible protein CPRF2 [Nicotiana tomentosiformis]	-	-	-	-	-	-	-
Unigene0082011	57	47	1.1245	1.5021	1.4018	1.6531	0.6348	0.747	1.3428	1.011633333	-0.408557962	0.449328292	0.912173855	no	Os05g0481400	B3 DNA binding domain-containing protein [Cynara cardunculus var. scolymus] [Cynara cardunculus]	-	-	-	-	-	-	-
Unigene0082182	3703.666667	4333.333333	19.8723	17.4435	14.1718	17.0762	18.9143	18.3487	17.16253333	18.11306667	0.077768303	0.75979264	1	no	ARF2	PREDICTED: auxin response factor 2 isoform X2 [Nelumbo nucifera]	-	-	-	-	-	-	GO:0009987//cellular process
Unigene0082263	568.6666667	675	6.8143	5.0093	6.4088	6.139	5.4176	7.8552	6.077466667	6.4706	0.09042942	0.78806197	1	no	WRKY35	PREDICTED: probable WRKY transcription factor 35 [Amborella trichopoda]	-	-	-	-	-	-	-
Unigene0082371	990.6666667	1129	9.8625	10.1235	8.0126	9.3687	10.1967	9.2596	9.332866667	9.608333333	0.041965917	0.888573119	1	no	pyrH	PREDICTED: annexin B11 [Eucalyptus grandis]	-	-	-	-	-	-	-
Unigene0082382	1579	1878.333333	14.5546	14.4968	14.5552	16.7847	14.6915	15.304	14.53553333	15.5934	0.101351522	0.708727875	0.997062859	no	NFYA7	NFYA1 [Larix kaempferi]	-	-	-	-	-	-	-
Unigene0082527	2644.666667	2046	30.5407	39.0227	30.0795	22.7828	25.1642	21.7974	33.2143	23.24813333	-0.514689627	0.056015503	0.437948323	no	--	PREDICTED: probable transcription factor At3g04930 isoform X2 [Beta vulgaris subsp. vulgaris] [Beta vulgaris]	-	-	-	-	-	-	-
Unigene0082542	697	670.3333333	8.1792	9.8325	8.3033	7.5471	7.5591	7.7758	8.771666667	7.627333333	-0.201672239	0.514487835	0.939311489	no	LBD38	PREDICTED: LOB domain-containing protein 38 [Citrus sinensis]	-	-	-	-	-	-	-
Unigene0082557	165.6666667	341.3333333	2.6666	2.0321	2.2438	4.4714	3.997	4.3924	2.314166667	4.286933333	0.88945321	0.011254346	0.159267586	no	SCL4	lateral suppressor protein [Chrysanthemum lavandulifolium]	-	-	-	-	-	-	-
Unigene0082567	1430	1227.333333	13.0274	11.722	12.2255	10.2989	8.9409	9.3498	12.32496667	9.529866667	-0.37105581	0.18808882	0.742974489	no	At5g56900	PREDICTED: zinc finger CCCH domain-containing protein 64 isoform X2 [Vitis vinifera]	-	-	-	-	-	-	-
Unigene0082635	1105.666667	1141.666667	6.9447	6.3713	7.3056	5.3104	6.191	7.5897	6.873866667	6.3637	-0.111256043	0.713672301	0.998482629	no	TBP1	myb family transcription factor family protein [Populus trichocarpa]	-	-	-	-	-	-	-
Unigene0082643	39	66.33333333	1.3073	1.102	0.8623	2.6967	1.5323	0.8366	1.090533333	1.688533333	0.630736792	0.267817605	0.814580372	no	FIT	PREDICTED: transcription factor FER-LIKE IRON DEFICIENCY-INDUCED TRANSCRIPTION FACTOR-like [Nelumbo nucifera]	-	-	-	-	-	-	-
Unigene0082644	8.333333333	9	0.7227	0.1906	0.3781	0.4756	0.486	0.2763	0.430466667	0.412633333	-0.061041157	1	1	no	FIT	PREDICTED: transcription factor FER-LIKE IRON DEFICIENCY-INDUCED TRANSCRIPTION FACTOR-like [Citrus sinensis]	-	-	-	-	-	-	-
Unigene0082645	49.66666667	83.33333333	1.5573	1.8667	0.5146	2.1647	1.9175	1.9985	1.312866667	2.0269	0.626554508	0.252413951	0.811849343	no	FIT	PREDICTED: transcription factor SCREAM2 [Amborella trichopoda]	-	-	-	-	-	-	-
Unigene0082699	1545.666667	1279	16.6992	16.6485	18.9263	13.2229	12.2257	13.4435	17.42466667	12.96403333	-0.426616422	0.127279054	0.642846473	no	--	PREDICTED: trihelix transcription factor ASR3-like [Nelumbo nucifera]	-	-	-	-	-	-	-
Unigene0082730	2080.333333	2645.333333	11.7341	2.8236	11.2207	10.1475	8.4648	10.296	8.5928	9.6361	0.165321049	0.700639169	0.995496164	no	GT-4	PREDICTED: ribonuclease J isoform X2 [Setaria italica]	-	-	-	-	-	-	-
Unigene0082927	4699.333333	5854.333333	25.169	23.8565	26.9723	27.9597	27.5413	29.5554	25.3326	28.35213333	0.162462139	0.490503904	0.931265929	no	ARF4	ARF-L1 protein [Ginkgo biloba]	-	-	-	-	-	-	GO:0009987//cellular process
Unigene0083018	289	949	6.3279	4.3016	4.2744	15.135	16.5752	12.2201	4.967966667	14.64343333	1.559526452	7.55E-06	0.000384304	yes	AGL24(MIKC)	MADS5 [Pinus tabuliformis]	-	-	-	-	-	-	-
Unigene0083072	2734	3173.666667	13.5467	11.4376	10.6707	12.6346	12.5559	12.0962	11.885	12.4289	0.064556715	0.801107836	1	no	--	Homoserine kinase, partial [Anthurium amnicola]	-	-	-	-	-	-	-
Unigene0083193	1617.666667	1478.333333	10.7196	13.4338	10.8927	8.5956	11.1254	9.1689	11.68203333	9.629966667	-0.278688697	0.334191915	0.849424014	no	IDD1	PREDICTED: protein indeterminate-domain 9 [Vitis vinifera]	-	-	-	-	-	-	-
Unigene0083296	1448.666667	1244	10.9441	7.4667	9.0208	7.1633	6.5078	7.4639	9.143866667	7.045	-0.37620466	0.204523683	0.764988476	no	--	PREDICTED: stress response protein nst1 isoform X1 [Vitis vinifera]	-	-	-	-	-	-	-
Unigene0083370	1052.333333	903	11.4825	16.8323	9.738	10.7722	10.473	8.523	12.68426667	9.922733333	-0.354230626	0.286344713	0.833284113	no	DOF5.3	DOF [Larix kaempferi]	-	-	-	-	-	-	-
Unigene0083378	4208.333333	4158	36.8375	32.6309	39.2976	31.9998	33.6563	30.6589	36.25533333	32.105	-0.175395239	0.4709012	0.924602023	no	PHL1	PREDICTED: myb family transcription factor PHL7 isoform X1 [Elaeis guineensis]	-	-	-	-	-	-	-
Unigene0083434	2700	2650.666667	24.8016	32.6312	25.6109	26.7762	25.403	21.705	27.68123333	24.62806667	-0.168604845	0.529135396	0.945824351	no	ATHB-6	PREDICTED: homeobox-leucine zipper protein ATHB-6-like isoform X2 [Fragaria vesca subsp. vesca] [Fragaria vesca]	-	-	-	-	-	-	-
Unigene0083437	85	109	0.8226	1.0992	0.7814	1.5456	0.7689	0.8593	0.901066667	1.057933333	0.231542963	0.619697393	0.975905876	no	BZIP61	PREDICTED: basic leucine zipper 61-like [Nelumbo nucifera]	-	-	-	-	-	-	-
Unigene0083570	3427	4006.333333	14.3021	14.9146	13.0004	14.9708	13.1941	16.4715	14.07236667	14.8788	0.080393196	0.74804827	1	no	ARF16	PREDICTED: auxin response factor 18-like [Nelumbo nucifera]	-	-	-	-	-	-	-
Unigene0083586	213	234	2.8812	3.2458	2.1434	2.423	3.0881	2.7116	2.7568	2.7409	-0.008344913	0.985808467	1	no	At4g06634	Zinc finger, C2H2 [Cynara cardunculus var. scolymus] [Cynara cardunculus]	-	-	-	-	-	-	-
Unigene0083634	15084	16899.66667	65.3136	52.7287	61.1846	55.3402	72.3549	51.8013	59.7423	59.83213333	0.002167723	0.992957188	1	no	GLK1	pseudo response regulator [Selaginella moellendorffii]	-	-	-	-	-	-	-
Unigene0083681	1474.666667	1695.333333	9.2487	7.4392	8.5327	7.6511	8.9995	9.3234	8.406866667	8.658	0.042465608	0.881135068	1	no	MYC2	JAMYC2 [Taxus cuspidata]	Environmental Information Processing	Signal transduction	ko04075//Plant hormone signal transduction	K13422	-	-	-
Unigene0083689	541.6666667	386.6666667	5.5809	6.3898	6.7291	4.1755	5.335	2.4528	6.233266667	3.987766667	-0.644407437	0.088698544	0.54886093	no	RAV1	AP2/ERF domain-containing transcription factor [Vernicia fordii]	-	-	-	-	-	-	-
Unigene0083690	4	2	0	0.296	0.2396	0	0.1568	0.0817	0.178533333	0.0795	-1.167166694	0.655210814	0.987538164	no	NGA2	PREDICTED: B3 domain-containing transcription factor NGA1-like [Tarenaya hassleriana]	-	-	-	-	-	-	-
Unigene0083877	3186.666667	2063.666667	7.6316	4.3657	7.0665	4.5092	3.4173	3.1141	6.3546	3.6802	-0.788017144	0.010025919	0.146808306	no	ZHD3	PREDICTED: zinc-finger homeodomain protein 4-like [Glycine max]	-	-	-	-	-	-	-
Unigene0083953	1734.666667	2016.333333	11.7522	8.6649	13.1015	12.1439	11.2597	11.4067	11.17286667	11.60343333	0.054552355	0.849251849	1	no	MBD8	Methyl-CpG-binding domain-containing protein 8, partial [Anthurium amnicola]	-	-	-	-	-	-	-
Unigene0084067	4062	4388.666667	19.882	14.6351	18.5354	15.3025	17.1931	18.7766	17.68416667	17.09073333	-0.049243934	0.846934355	1	no	ARR2	PREDICTED: two-component response regulator ORR24-like [Nelumbo nucifera]	Environmental Information Processing	Signal transduction	ko04075//Plant hormone signal transduction	K14491	-	-	-
Unigene0084082	283	330.3333333	2.657	3.6146	2.7573	4.2962	2.5711	2.7475	3.009633333	3.204933333	0.090706615	0.813598287	1	no	GATA12	PREDICTED: GATA transcription factor 12-like [Populus euphratica]	-	-	-	-	-	-	-
Unigene0084157	10304.33333	9570.333333	62.281	77.3743	71.425	64.7375	59.6078	52.7806	70.3601	59.04196667	-0.253016755	0.283926884	0.831748099	no	BBX24	PREDICTED: B-box zinc finger protein 24-like [Ipomoea nil]	-	-	-	-	-	-	-
Unigene0084317	235.3333333	219.3333333	3.3393	3.9926	4.3149	2.7842	3.4725	3.4852	3.882266667	3.2473	-0.257658545	0.469588085	0.924314383	no	ERF2	transcription factor 3, partial [Pinus tabuliformis]	-	-	-	-	-	-	-
Unigene0084318	1553.333333	1584	27.1982	29.0216	23.2816	21.8591	31.8352	19.2302	26.50046667	24.30816667	-0.124576677	0.686634606	0.994956468	no	ERF2	ethylene response factor 11 [Medicago sativa]	-	-	-	-	-	-	-
Unigene0084356	160	132.3333333	4.1867	3.0665	3.891	2.2841	4.0838	1.8152	3.714733333	2.7277	-0.445573667	0.303932801	0.838508349	no	RL1	PREDICTED: protein RADIALIS-like 3 [Vitis vinifera]	-	-	-	-	-	-	-
Unigene0084394	2757	3137	17.0877	11.3423	15.916	14.9579	15.0126	15.1229	14.782	15.03113333	0.024112312	0.929020117	1	no	CLF	PREDICTED: histone-lysine N-methyltransferase CLF-like isoform X1 [Nelumbo nucifera]	-	-	-	-	-	-	-
Unigene0084395	32.66666667	26.33333333	1.2124	1.0661	0.4833	0.6649	1.0624	0.2833	0.9206	0.6702	-0.457982756	0.508778071	0.937898479	no	EZA1	PREDICTED: histone-lysine N-methyltransferase EZA1 isoform X4 [Nicotiana tomentosiformis]	-	-	-	-	-	-	-
Unigene0084414	839.6666667	877.6666667	4.1981	16.509	17.8789	16.5307	6.4676	13.7731	12.862	12.25713333	-0.06949339	0.892275648	1	no	MADS18	TM8-like MADS-box transcription factor [Cryptomeria japonica]	-	-	-	-	-	-	GO:0032774//RNA biosynthetic process;GO:0046483//heterocycle metabolic process;GO:0009059//macromolecule biosynthetic process;GO:1901360//organic cyclic compound metabolic process;GO:0009058//biosynthetic process;GO:0044260//cellular macromolecule metabolic process;GO:1901576//organic substance biosynthetic process;GO:0008152//metabolic process;GO:0097659//nucleic acid-templated transcription;GO:…
Unigene0084416	3.333333333	0.333333333	0	0.0417	0.4251	0	0.0386	0	0.1556	0.012866667	-3.596131808	0.300681135	0.838508349	no	MADS33	MADS3 [Zea mays]	-	-	-	-	-	-	-
Unigene0084417	270.3333333	264.3333333	2.33	3.8206	9.0492	5.1689	2.8238	5.2377	5.0666	4.410133333	-0.200195661	0.698005048	0.995496164	no	SOC1	TM8-like MADS-box transcription factor [Cryptomeria japonica]	-	-	-	-	-	-	-
Unigene0084479	260.3333333	273.6666667	2.7214	2.5223	2.8803	2.7976	2.6619	2.212	2.708	2.557166667	-0.082681546	0.813302025	1	no	ASIL2	PREDICTED: trihelix transcription factor ASIL2-like [Nelumbo nucifera]	-	-	-	-	-	-	GO:0007275//multicellular organism development;GO:0032501//multicellular organismal process;GO:0032502//developmental process;GO:0044707//single-multicellular organism process;GO:0044767//single-organism developmental process;GO:0044699//single-organism process
Unigene0084581	5982	8264.666667	23.0698	18.5562	19.5641	28.0505	23.2946	24.808	20.3967	25.38436667	0.315604509	0.187489726	0.742065244	no	SPL15	PREDICTED: squamosa promoter-binding-like protein 14 [Amborella trichopoda]	-	-	-	-	-	-	-
Unigene0084624	407.3333333	524	4.2379	3.5967	3.3207	4.0492	4.3795	4.4903	3.718433333	4.306333333	0.211765089	0.516107673	0.939936619	no	CIGR2	SCL10 [Pinus radiata]	-	-	-	-	-	-	-
Unigene0084639	1289.333333	1484.666667	11.7008	9.7644	9.2155	9.921	10.1177	11.7783	10.2269	10.60566667	0.052466412	0.856337789	1	no	reb1	PREDICTED: RNA polymerase I termination factor [Glycine max]	-	-	-	-	-	-	-
Unigene0084656	1553.333333	1857	5.5498	4.1996	5.4931	5.1858	5.2292	5.8968	5.080833333	5.437266667	0.097816446	0.729712146	1	no	NFYA7	NFYA1 [Larix kaempferi]	-	-	-	-	-	-	-
Unigene0084678	107.6666667	128.6666667	1.2277	0.4858	0.8591	0.9842	0.8324	0.9245	0.857533333	0.9137	0.091527804	0.840833996	1	no	Os11g0197600	PREDICTED: B3 domain-containing protein Os11g0197600-like [Oryza brachyantha]	-	-	-	-	-	-	-
Unigene0084712	4720.666667	6137	29.469	36.876	27.8051	38.1826	40.8379	31.7776	31.38336667	36.9327	0.23489861	0.349911821	0.854463032	no	SPL8	SQUAMOSA promoter-binding protein-like protein [Marchantia polymorpha subsp. ruderalis] [Marchantia polymorpha]	-	-	-	-	GO:0043231//intracellular membrane-bounded organelle;GO:0005623//cell;GO:0005622//intracellular;GO:0043226//organelle;GO:0043229//intracellular organelle;GO:0044464//cell part;GO:0043227//membrane-bounded organelle;GO:0044424//intracellular part	-	-
Unigene0084733	557.3333333	547	8.4612	7.2842	7.8958	6.3599	7.7189	6.7191	7.8804	6.932633333	-0.184865403	0.562215325	0.958907249	no	BHLH121	PREDICTED: transcription factor bHLH121 [Amborella trichopoda]	-	-	-	-	-	-	-
Unigene0084783	3050	3651	19.0334	17.9752	19.283	20.5102	21.1418	18.8992	18.76386667	20.18373333	0.105235896	0.670543071	0.991379232	no	POSF21	PREDICTED: probable transcription factor PosF21 [Musa acuminata subsp. malaccensis] [Musa acuminata]	-	-	-	-	-	-	-
Unigene0085275	2269.666667	2579.666667	16.1656	13.502	12.9842	15.0159	14.1563	14.5055	14.21726667	14.55923333	0.03429026	0.896373774	1	no	NAC48	NAC domain-containing protein 2 [Zostera marina]	-	-	-	-	-	-	-
Unigene0085302	1231.666667	1882.666667	9.479	7.2419	9.8496	12.9325	12.5719	10.8311	8.856833333	12.11183333	0.451554382	0.118795033	0.628528862	no	BAM7	PREDICTED: beta-amylase 2, chloroplastic-like isoform X1 [Nelumbo nucifera]	Metabolism	Carbohydrate metabolism	ko00500//Starch and sucrose metabolism	K01177	-	-	-
Unigene0085741	1790.666667	3551	4.9837	7.1349	5.6014	11.2152	9.8923	10.7874	5.906666667	10.63163333	0.847947151	0.0017984	0.040509679	no	BHLH110	PREDICTED: transcription factor bHLH113 [Amborella trichopoda]	-	-	-	-	-	-	-
Unigene0085745	770.6666667	633.3333333	4.655	5.4065	5.3222	4.2077	3.0487	4.1826	5.1279	3.813	-0.427441597	0.182625325	0.734361469	no	ASIL2	aspartate/glutamate/uridylate kinase family protein [Arabidopsis thaliana]	Metabolism	Nucleotide metabolism;Global and Overview	ko01100//Metabolic pathways;ko00240//Pyrimidine metabolism	K09903	GO:0005623//cell;GO:0044464//cell part;GO:0005622//intracellular;GO:0044424//intracellular part	-	GO:0009987//cellular process;GO:0006139//nucleobase-containing compound metabolic process;GO:0043170//macromolecule metabolic process;GO:0019439//aromatic compound catabolic process;GO:0044238//primary metabolic process;GO:1901360//organic cyclic compound metabolic process;GO:0008152//metabolic process;GO:0044699//single-organism process;GO:0009314//response to radiation;GO:0050896//response to s…
Unigene0085756	1175.333333	1207.666667	13.6468	13.2341	14.4272	11.9068	13.7788	12.3956	13.76936667	12.69373333	-0.117345763	0.682565569	0.99452762	no	WRKY4	PREDICTED: probable WRKY transcription factor 3 [Amborella trichopoda]	-	-	-	-	-	-	-
Unigene0085844	1017.666667	876.6666667	9.3967	11.2822	9.5891	8.2483	8.077	7.2491	10.08933333	7.858133333	-0.360572297	0.228020706	0.78877938	no	TCP19	PREDICTED: transcription factor TCP20 [Capsicum annuum]	-	-	-	-	-	-	-
Unigene0085853	681.6666667	650	4.3473	2.2377	2.5547	2.6894	2.4754	2.6523	3.046566667	2.6057	-0.225513318	0.529129151	0.945824351	no	BLH7	PREDICTED: BEL1-like homeodomain protein 1 [Amborella trichopoda]	-	-	-	-	-	-	-
Unigene0085867	3076	3537.666667	21.8654	24.7072	20.3013	20.9388	24.2098	24.286	22.2913	23.14486667	0.054211496	0.83116089	1	no	At2g41900	PREDICTED: zinc finger CCCH domain-containing protein 30-like isoform X1 [Vigna angularis]	-	-	-	-	-	-	-
Unigene0085871	150	197.3333333	2.0147	2.5913	1.4974	1.9201	2.6162	2.7516	2.034466667	2.4293	0.25589002	0.519767454	0.941370946	no	PIF3	transcription factor bHLH23 [Amborella trichopoda]	-	-	-	-	-	-	-
Unigene0085900	450.3333333	445	4.7897	5.3147	4.3182	4.6628	4.1552	4.0886	4.807533333	4.3022	-0.160222267	0.62319419	0.977715892	no	GAM1	myb domain protein 33 [Larix kaempferi]	-	-	-	-	-	-	-
Unigene0085950	286	383	2.88	2.6395	3.5008	4.3994	2.2928	4.2032	3.006766667	3.6318	0.272471842	0.479203195	0.928719456	no	FLL	FLO/LFY like protein [Cryptomeria japonica]	-	-	-	-	-	-	-
Unigene0085951	9.666666667	13.33333333	0.3391	0.1878	0.4612	0.7185	0.1161	0.3932	0.329366667	0.409266667	0.313346614	0.753697367	1	no	FLL	NEEDLY protein, partial [Austrotaxus spicata]	-	-	-	-	-	-	-
Unigene0086182	692.6666667	519.3333333	5.1715	6.1843	6.7682	4.7807	2.9382	4.5739	6.041333333	4.0976	-0.560087832	0.104588016	0.593875059	no	NAC008	PREDICTED: NAC domain-containing protein 8 [Amborella trichopoda]	-	-	-	-	-	-	-
Unigene0086427	255.3333333	312.3333333	7.9247	6.4819	5.6761	5.7329	8.1482	8.1842	6.694233333	7.3551	0.135826118	0.712139292	0.998182185	no	Os04g0663200	Os04g0663200, partial [Oryza sativa Japonica Group]	-	-	-	-	-	-	-
Unigene0086506	2	0.666666667	0.5244	0	0	0	0.1496	0	0.1748	0.049866667	-1.80955751	0.745297614	1	no	MYB4	PREDICTED: myb-related protein Myb4-like [Nicotiana sylvestris]	-	-	-	-	-	-	-
Unigene0086507	25.33333333	22.33333333	0.7203	0.304	0.5383	0.5688	0.3347	0.3305	0.520866667	0.411333333	-0.340606125	0.623679061	0.977775117	no	MYB4	PREDICTED: transcription factor MYB3-like [Nelumbo nucifera]	-	-	-	-	-	-	-
Unigene0086508	53.66666667	69.66666667	0.6496	1.1245	0.7816	0.9874	0.8061	1.2313	0.8519	1.008266667	0.243121258	0.619419619	0.975832534	no	MYB39	PREDICTED: transcription factor MYB80 isoform X2 [Theobroma cacao]	-	-	-	-	-	-	-
Unigene0086527	152.3333333	94.33333333	1.8724	2.3801	1.8313	1.5	0.8942	1.0409	2.027933333	1.145033333	-0.824620628	0.044271611	0.383569729	no	HSFA2E	HSF_DNA-bind domain-containing protein [Cephalotus follicularis]	-	-	-	-	-	-	-
Unigene0086659	39.33333333	91.33333333	0.2654	1.0128	0.759	0.8802	1.4992	1.9097	0.679066667	1.4297	1.07408733	0.064800905	0.471510231	no	WRKY41	WRKY family transcription factor [Medicago truncatula]	-	-	-	-	-	-	-
Unigene0086669	1309	1255.333333	11.2221	11.7104	12.0531	8.9591	9.5971	11.6282	11.66186667	10.06146667	-0.21295811	0.461186787	0.920924197	no	GT-1	PREDICTED: trihelix transcription factor GT-1 [Amborella trichopoda]	-	-	-	-	-	-	-
Unigene0086752	377.6666667	310	4.2663	4.9265	4.362	2.9562	2.9232	4.1744	4.518266667	3.351266667	-0.431062932	0.216325472	0.773458964	no	BPC6	GAGA-binding transcriptional activator [Picea sitchensis]	-	-	-	-	-	-	-
Unigene0086827	1677	2052.333333	13.4377	16.2292	14.1153	15.8518	16.7481	15.7829	14.59406667	16.1276	0.144149813	0.595242345	0.970437658	no	ASIL2	PREDICTED: trihelix transcription factor ASIL2-like [Nelumbo nucifera]	-	-	-	-	-	-	GO:0007275//multicellular organism development;GO:0032501//multicellular organismal process;GO:0044699//single-organism process;GO:0044767//single-organism developmental process;GO:0032502//developmental process;GO:0044707//single-multicellular organism process
Unigene0086848	43	35	0.3837	1.1861	0.5062	0.538	0.4284	0.5953	0.692	0.520566667	-0.410689103	0.503449461	0.935730456	no	KN1	homeobox transcription factor SKN1 [Picea mariana]	-	-	-	-	-	-	-
Unigene0086849	65	97.66666667	0.6148	1.0128	0.6685	1.0328	1.4031	0.6882	0.765366667	1.041366667	0.444255158	0.349457578	0.854463032	no	OSH1	homeobox transcription factor SKN2 [Picea mariana]	-	-	-	-	-	-	-
Unigene0086861	2827	3794.666667	11.5919	6.6041	11.5012	11.5387	12.2321	11.6856	9.899066667	11.8188	0.255719149	0.375328394	0.871562364	no	ARR2	PREDICTED: two-component response regulator ORR21-like isoform X1 [Nelumbo nucifera]	Environmental Information Processing	Signal transduction	ko04075//Plant hormone signal transduction	K14491	-	-	GO:0009987//cellular process
Unigene0086930	892.3333333	1158.333333	6.7865	4.0666	6.2744	6.5599	5.8744	7.4286	5.709166667	6.620966667	0.213761688	0.512100901	0.938591836	no	SCL1	PREDICTED: scarecrow-like protein 1 [Juglans regia]	-	-	-	-	-	-	-
Unigene0086988	353.6666667	408	1.9973	4.0156	1.9203	3.4528	1.9668	3.0268	2.6444	2.815466667	0.090433651	0.831509093	1	no	AIL1	AINTEGUMENTA-like protein [Pinus thunbergii]	-	-	-	-	-	-	-
Unigene0087033	5176.333333	4385.333333	44.0283	31.0941	40.6477	29.8445	27.1477	30.8928	38.59003333	29.295	-0.39757384	0.115537799	0.62024563	no	HSF8	Heat stress transcription factor A-2b [Aegilops tauschii]	-	-	-	-	-	-	-
Unigene0087038	1057.333333	1592.666667	7.8179	8.6507	6.6572	11.0876	9.0614	11.4643	7.7086	10.53776667	0.451028367	0.125538021	0.64011317	no	HSFA1	PREDICTED: heat stress transcription factor A-1 [Amborella trichopoda]	-	-	-	-	-	-	-
Unigene0087039	910	827	9.2483	11.1691	8.4909	7.7051	6.9549	9.1741	9.6361	7.9447	-0.278456622	0.37368391	0.871397502	no	HSFA1	PREDICTED: heat stress transcription factor A-1 [Amborella trichopoda]	-	-	-	-	-	-	-
Unigene0087084	141.6666667	267.6666667	0.8298	0.7662	0.8261	1.4813	1.1739	1.4703	0.807366667	1.375166667	0.768310551	0.030751927	0.308286657	no	MYB3R-1	PREDICTED: myb-related protein 3R-1 [Amborella trichopoda]	-	-	-	-	-	-	-
Unigene0087140	1087	989.6666667	6.4524	5.1542	6.1923	5.2141	4.5989	4.7392	5.932966667	4.850733333	-0.290550807	0.327858419	0.845107623	no	--	Os02g0116000 [Oryza sativa Japonica Group]	-	-	-	-	-	-	-
Unigene0087141	1307	1251.666667	12.4885	12.2862	10.3258	9.7541	9.6767	10.9376	11.70016667	10.1228	-0.208920681	0.46684423	0.922981548	no	ZXDA	zinc finger protein 16-like [Dorcoceras hygrometricum]	-	-	-	-	-	-	-
Unigene0087267	189.3333333	228.6666667	2.5246	2.6573	1.8491	2.2212	2.312	3.1642	2.343666667	2.5658	0.130641325	0.732771889	1	no	AGL62	PREDICTED: agamous-like MADS-box protein AGL62 [Nicotiana tomentosiformis]	-	-	-	-	-	-	-
Unigene0087637	1083	1079.666667	7.7396	10.5711	9.3194	8.1581	8.4228	8.3081	9.210033333	8.296333333	-0.150732517	0.613648189	0.97394546	no	DPB	PREDICTED: transcription factor-like protein DPB [Nelumbo nucifera]	-	-	-	-	-	-	-
Unigene0087646	491	657.3333333	2.8241	2.2491	2.3671	2.5783	3.3306	3.0158	2.4801	2.9749	0.262442881	0.41842362	0.896138833	no	MYB3R-1	PREDICTED: myb-related protein 3R-1-like [Nicotiana attenuata]	-	-	-	-	-	GO:0005488//binding	-
Unigene0087844	55	42.66666667	0.3364	0.8098	0.8045	0.2767	0.6581	0.418	0.650233333	0.450933333	-0.528043357	0.363595535	0.86401208	no	SAP	PREDICTED: transcriptional regulator STERILE APETALA [Nelumbo nucifera]	-	-	-	-	-	-	-
Unigene0087845	1.666666667	4	0	0.1867	0.3173	0	0.9518	0.0902	0.168	0.347333333	1.047859639	0.651262594	0.985705101	no	--	PREDICTED: transcriptional regulator STERILE APETALA [Nelumbo nucifera]	-	-	-	-	-	-	-
Unigene0087848	762	1412.666667	6.5568	7.8333	6.32	10.9004	12.7471	11.0235	6.903366667	11.557	0.743394928	0.012797359	0.173671863	no	SAP	PREDICTED: transcriptional regulator STERILE APETALA [Nelumbo nucifera]	-	-	-	-	-	-	-
Unigene0087902	250	286	1.9356	2.1518	1.7359	1.7395	2.2178	2.0508	1.9411	2.0027	0.045071881	0.900278181	1	no	ZAT4	PREDICTED: zinc finger protein ZAT3 [Amborella trichopoda]	-	-	-	-	-	-	-
Unigene0087905	1403	953.3333333	13.2094	11.9247	13.0909	7.0785	7.8566	8.377	12.74166667	7.7707	-0.71343753	0.013449037	0.179479184	no	ZAT2	EPF-type Cis2-His2 zinc finger transcription factor [Selaginella moellendorffii]	-	-	-	-	-	-	-
Unigene0087906	105.3333333	161	0.9576	1.444	0.8794	1.1567	1.967	1.4142	1.093666667	1.512633333	0.467889223	0.268531154	0.815500604	no	ZAT2	PREDICTED: ras-responsive element-binding protein 1 [Nicotiana attenuata]	-	-	-	-	-	-	-
Unigene0087978	1483.333333	1797.666667	9.3677	7.6367	9.9033	7.6651	10.254	11.1926	8.969233333	9.7039	0.113580011	0.701184029	0.995496164	no	EIN3	PREDICTED: ETHYLENE INSENSITIVE 3-like 3 protein isoform X3 [Nelumbo nucifera]	Environmental Information Processing	Signal transduction	ko04075//Plant hormone signal transduction	K14514	-	-	-
Unigene0088299	1065.666667	1078.333333	10.4816	9.9777	11.7326	10.8834	8.5881	9.8489	10.73063333	9.773466667	-0.134792943	0.650220181	0.985645372	no	NAC030	PREDICTED: NAC domain-containing protein 7-like isoform X2 [Populus euphratica]	-	-	-	-	-	-	-
Unigene0088381	609	556.3333333	18.5196	22.5189	12.9496	14.0509	16.8348	13.902	17.99603333	14.92923333	-0.269538864	0.437165334	0.906387691	no	ERF018	AP2/ERF domain-containing protein [Cynara cardunculus var. scolymus] [Cynara cardunculus]	-	-	-	-	-	-	-
Unigene0088435	3977.333333	6393.666667	20.7951	12.1399	13.0652	17.7815	19.5766	28.9605	15.3334	22.1062	0.527773418	0.07974411	0.522510798	no	At2g41900	PREDICTED: zinc finger CCCH domain-containing protein 30 [Prunus mume]	-	-	-	-	-	-	-
Unigene0088645	368	485.6666667	4.4399	3.0793	3.9039	4.5801	4.6832	4.2303	3.8077	4.497866667	0.240321078	0.474718282	0.926619839	no	TCX5	CXC domain-containing protein [Cephalotus follicularis]	-	-	-	-	-	-	-
Unigene0088899	628.6666667	470	5.481	4.1309	4.5228	2.5317	3.6997	3.2145	4.711566667	3.148633333	-0.581481096	0.084060905	0.534037149	no	MYB4	transcription factor MYB30 [Picea abies]	-	-	-	-	-	-	-
Unigene0088900	46.33333333	46.33333333	0.6137	1.3811	0.5819	0.9894	0.6565	0.7356	0.8589	0.793833333	-0.113654028	0.849033551	1	no	MYB12	MYB-like protein [Taxus globosa]	-	-	-	-	-	-	-
Unigene0088901	3.666666667	9	0.1472	0.3625	0	0.3165	0.5041	0.3503	0.1699	0.3903	1.19989761	0.379628338	0.871562364	no	MYB308	myb-related protein 308-like [Malus domestica]	-	-	-	-	-	-	-
Unigene0089034	632.3333333	725	6.2523	4.5862	5.3777	5.1404	5.4472	6.0774	5.4054	5.555	0.03938553	0.902993019	1	no	Os08g0159800	PREDICTED: zinc finger CCCH domain-containing protein 56 [Amborella trichopoda]	-	-	-	-	-	-	-
Unigene0089202	736	835.3333333	6.5544	6.7576	6.5149	7.0533	6.7707	6.4641	6.608966667	6.7627	0.033174636	0.913407136	1	no	TRB1	PREDICTED: telomere repeat-binding factor 1 isoform X1 [Amborella trichopoda]	-	-	-	-	-	-	-
Unigene0089279	872.6666667	760.6666667	8.0039	8.2698	7.5999	5.6519	6.7712	6.3062	7.957866667	6.2431	-0.350119152	0.24625363	0.80509043	no	GTL1	PREDICTED: trihelix transcription factor GTL1-like [Nelumbo nucifera]	-	-	-	-	-	-	-
Unigene0089408	1470.333333	1077	12.5785	9.0728	11.2571	7.744	6.6795	7.2099	10.96946667	7.211133333	-0.605195461	0.040362374	0.363165034	no	NFYA7	NF-YA7 [Pinus tabuliformis]	-	-	-	-	-	-	-
Unigene0089425	835.6666667	1429.666667	8.3799	7.1055	7.0982	6.771	10.7076	17.1712	7.527866667	11.54993333	0.617571544	0.095961657	0.56886564	no	WRKY42	probable WRKY transcription factor 31 [Cajanus cajan]	-	-	-	-	-	-	-
Unigene0089559	1996.666667	2200	26.7915	39.4982	26.9164	30.3548	30.188	32.812	31.0687	31.11826667	0.002299826	0.994372573	1	no	BHLH35	PREDICTED: transcription factor bHLH35 [Elaeis guineensis]	-	-	-	-	-	-	-
Unigene0089560	68.33333333	93.33333333	0.9577	1.4147	1.1295	1.3956	1.6393	1.2892	1.1673	1.441366667	0.304262001	0.490726768	0.931290648	no	FIT	FIT1 [Marchantia polymorpha]	-	-	-	-	-	-	-
Unigene0089713	3417.333333	2805.666667	26.6633	27.1366	27.6786	22.6811	19.0597	18.6016	27.1595	20.11413333	-0.433247343	0.086610681	0.542344251	no	DIVARICATA	PREDICTED: transcription factor DIVARICATA [Amborella trichopoda]	-	-	-	-	-	-	-
Unigene0089768	1701	1774.666667	8.6066	7.2909	7.6662	6.9912	6.9785	8.1358	7.854566667	7.3685	-0.092160724	0.738564598	1	no	CDC5	PREDICTED: cell division cycle 5-like protein [Nelumbo nucifera]	Genetic Information Processing	Transcription	ko03040//Spliceosome	K12860	-	GO:0005488//binding	GO:0044699//single-organism process;GO:0009987//cellular process;GO:0044763//single-organism cellular process
Unigene0089840	211.3333333	230.3333333	1.2253	1.6938	1.3393	1.7658	1.0722	1.3922	1.419466667	1.410066667	-0.009585597	0.981547565	1	no	ASIL2	PREDICTED: trihelix transcription factor ASIL1-like [Elaeis guineensis]	-	-	-	-	-	-	GO:0006807//nitrogen compound metabolic process;GO:0034645//cellular macromolecule biosynthetic process;GO:0008152//metabolic process;GO:0034654//nucleobase-containing compound biosynthetic process;GO:0044237//cellular metabolic process;GO:0009059//macromolecule biosynthetic process;GO:0009058//biosynthetic process;GO:0097659//nucleic acid-templated transcription;GO:0009987//cellular process;GO:0…
Unigene0089924	1142	1092.666667	8.6047	8.4327	7.404	7.5337	6.9927	6.5968	8.147133333	7.041066667	-0.210498517	0.469395695	0.924236072	no	SWI3B	PREDICTED: SWI/SNF complex subunit SWI3B [Nelumbo nucifera]	-	-	-	-	-	-	-
Unigene0090126	642	801.6666667	5.4763	4.8359	5.9525	6.0574	5.693	6.473	5.421566667	6.074466667	0.16404794	0.596094569	0.970585323	no	PCFS4	PREDICTED: polyadenylation and cleavage factor homolog 4 [Theobroma cacao]	Genetic Information Processing	Translation	ko03015//mRNA surveillance pathway	K14400	-	-	-
Unigene0090147	505.3333333	676.3333333	3.5298	5.3252	3.6667	5.7882	4.445	5.0471	4.1739	5.093433333	0.287242426	0.398886707	0.885084152	no	LRP1	PREDICTED: protein LATERAL ROOT PRIMORDIUM 1 [Amborella trichopoda]	-	-	-	-	-	-	-
Unigene0090309	2603.666667	3230	18.1225	13.0841	16.1969	18.2005	16.8299	17.7049	15.80116667	17.57843333	0.153775414	0.557493072	0.956848162	no	ZNF606	early flowering 6 [Dimocarpus longan]	-	-	-	-	-	-	-
Unigene0090310	554.6666667	772.3333333	4.2021	4.2298	4.2833	4.513	4.9146	6.5029	4.2384	5.310166667	0.325237394	0.313370926	0.838508349	no	TCP8	PREDICTED: transcription factor TCP8 [Amborella trichopoda]	-	-	-	-	-	-	-
Unigene0090333	1166.666667	842.6666667	9.1868	8.3629	8.6913	5.3535	6.0643	5.6033	8.747	5.6737	-0.624498424	0.033272998	0.323776603	no	SCL4	SCL2, partial [Pinus radiata]	-	-	-	-	-	-	-
Unigene0090389	10434.33333	10286.33333	107.4533	115.0698	133.7699	100.2766	123.0267	91.2074	118.7643333	104.8369	-0.179955039	0.457501358	0.917751082	no	HAT5	PREDICTED: homeobox-leucine zipper protein HAT5 [Nelumbo nucifera]	-	-	-	-	-	-	-
Unigene0090450	8610.333333	9381.333333	26.2971	18.4566	23.5201	21.3624	22.6029	22.594	22.75793333	22.18643333	-0.036691791	0.879545924	1	no	RVE2	protein cca1 [Nicotiana attenuata]	-	-	-	-	-	GO:0005488//binding	-
Unigene0090481	5008.666667	4232.333333	30.7037	28.3934	32.3952	26.7568	21.641	21.2004	30.49743333	23.1994	-0.394600337	0.109250015	0.604273114	no	Os04g0438700	PREDICTED: zinc finger CCCH domain-containing protein 28 [Oryza brachyantha]	-	-	-	-	-	-	-
Unigene0090632	12812.66667	16979.66667	38.8795	22.6976	33.4668	36.1255	34.1966	42.2163	31.6813	37.5128	0.243751416	0.351854381	0.854463032	no	SPL16	PREDICTED: squamosa promoter-binding-like protein 14 [Prunus mume]	-	-	-	-	-	-	-
Unigene0090751	286.3333333	385.6666667	2.8301	3.1685	3.4624	4.1061	3.0517	4.3435	3.153666667	3.833766667	0.281732354	0.418916516	0.896395877	no	MYB5	transcription repressor MYB5-like [Malus domestica]	-	-	-	-	-	-	-
Unigene0090752	56.33333333	43.66666667	3.1009	1.5389	1.8656	1.607	0.9953	1.9363	2.168466667	1.512866667	-0.519390422	0.337147655	0.851508446	no	MYB5	PREDICTED: transcription repressor MYB5 [Ricinus communis]	-	-	-	-	-	-	-
Unigene0090754	6	3.333333333	0.8026	0.3294	0.4666	0.1643	0.1527	0.4773	0.532866667	0.264766667	-1.009053086	0.430846381	0.904036051	no	MYB5	PREDICTED: myb-related protein Zm38 [Eucalyptus grandis]	-	-	-	-	-	GO:0005488//binding	-
Unigene0090844	1310.666667	1228.333333	13.0102	4.6116	11.4696	10.011	5.927	8.3462	9.697133333	8.094733333	-0.260574767	0.516018354	0.939917383	no	Os03g0826400	PREDICTED: zinc finger CCCH domain-containing protein 25 [Eucalyptus grandis]	-	-	-	-	-	-	-
Unigene0090854	3294.666667	3856.333333	31.6157	27.9161	29.7808	31.1221	30.4848	32.3925	29.77086667	31.33313333	0.073787827	0.763524405	1	no	ASIL2	Uridylate kinase, partial [Anthurium amnicola]	-	-	-	-	-	-	-
Unigene0091037	1819	1492	7.1962	5.2403	7.6026	4.94	4.305	5.4647	6.6797	4.903233333	-0.446049892	0.129254935	0.64847256	no	BIM1	PREDICTED: transcription factor BIM2 [Amborella trichopoda]	-	-	-	-	-	-	-
Unigene0091284	1453.666667	1438	7.7472	6.6647	6.2704	7.527	4.6768	6.3321	6.8941	6.178633333	-0.158074465	0.60455975	0.971452371	no	RS2	PREDICTED: protein rough sheath 2 homolog [Sesamum indicum]	-	-	-	-	GO:0043226//organelle;GO:0044446//intracellular organelle part;GO:0031981//nuclear lumen;GO:0044422//organelle part;GO:0044464//cell part;GO:0031974//membrane-enclosed lumen;GO:0043229//intracellular organelle;GO:0070013//intracellular organelle lumen;GO:0044428//nuclear part;GO:0005622//intracellular;GO:0043233//organelle lumen;GO:0005634//nucleus;GO:0044424//intracellular part;GO:0005623//cell;…	GO:1901363//heterocyclic compound binding;GO:0003676//nucleic acid binding;GO:0005488//binding;GO:0005515//protein binding;GO:0046983//protein dimerization activity;GO:0097159//organic cyclic compound binding	GO:0044260//cellular macromolecule metabolic process;GO:0009628//response to abiotic stimulus;GO:0044699//single-organism process;GO:0048367//shoot system development;GO:0009798//axis specification;GO:0051301//cell division;GO:0009058//biosynthetic process;GO:0032502//developmental process;GO:0010035//response to inorganic substance;GO:0009943//adaxial/abaxial axis specification;GO:0048731//syste…
Unigene0091296	4634	4904.333333	26.6337	18.7589	25.5046	21.1338	22.7954	23.1179	23.6324	22.34903333	-0.080553719	0.750281806	1	no	NAC045	PREDICTED: NAC domain-containing protein 45-like [Phoenix dactylifera]	-	-	-	-	-	-	-
Unigene0091354	276.3333333	364.6666667	2.7273	4.3676	2.6642	3.9023	4.8338	2.9604	3.253033333	3.898833333	0.261256878	0.49929203	0.932944515	no	MYB4	MYB-like protein [Taxus globosa]	-	-	-	-	-	-	-
Unigene0091360	2210	2119	13.6308	13.6144	14.0048	11.4495	12.2325	11.8841	13.75	11.85536667	-0.213891335	0.410281166	0.890761785	no	GT-2	Myb_DNA-bind_4 domain-containing protein [Cephalotus follicularis]	-	-	-	-	-	-	-
Unigene0091375	2053.666667	1445.666667	17.7092	21.9296	19.4467	13.8728	12.3792	11.3721	19.69516667	12.54136667	-0.651147054	0.019533854	0.231071946	no	At1g01350	PREDICTED: zinc finger CCCH domain-containing protein 1-like [Ipomoea nil]	-	-	-	-	-	-	-
Unigene0091466	812	819.3333333	6.3301	7.385	7.5099	6.7672	5.7428	6.8203	7.075	6.443433333	-0.134900526	0.659483586	0.98825728	no	ERF9	ERF1 [Pinus tabuliformis]	-	-	-	-	GO:0043226//organelle;GO:0005623//cell;GO:0043227//membrane-bounded organelle;GO:0043229//intracellular organelle;GO:0043231//intracellular membrane-bounded organelle;GO:0044464//cell part;GO:0044424//intracellular part;GO:0005622//intracellular	GO:0003676//nucleic acid binding;GO:0005488//binding;GO:1901363//heterocyclic compound binding;GO:0097159//organic cyclic compound binding;GO:0001071//nucleic acid binding transcription factor activity;GO:0003677//DNA binding	GO:0008152//metabolic process;GO:0006950//response to stress;GO:0044260//cellular macromolecule metabolic process;GO:0009058//biosynthetic process;GO:0090304//nucleic acid metabolic process;GO:0018130//heterocycle biosynthetic process;GO:0034641//cellular nitrogen compound metabolic process;GO:0006351//transcription, DNA-templated;GO:0044238//primary metabolic process;GO:0006807//nitrogen compoun…
Unigene0091727	587	598.3333333	5.9719	5.7286	5.1225	6.0467	4.9702	4.4884	5.607666667	5.168433333	-0.117673561	0.715996103	0.999186194	no	SHH2	PREDICTED: protein SAWADEE HOMEODOMAIN HOMOLOG 2 [Theobroma cacao]	-	-	-	-	-	-	-
Unigene0092106	8.666666667	7.666666667	0.6324	0	0.6617	0	0.5413	0.4339	0.431366667	0.325066667	-0.408179073	0.805204503	1	no	NAC045	PREDICTED: NAC domain-containing protein 86-like [Vigna angularis]	-	-	-	-	-	-	-
Unigene0092107	3351	3491.666667	25.1838	17.3297	26.0129	21.9085	17.131	24.8956	22.84213333	21.3117	-0.100051718	0.722280154	1	no	NAC045	NAC domain-containing protein 86-like isoform X2 [Asparagus officinalis]	-	-	-	-	-	-	GO:1901576//organic substance biosynthetic process;GO:0034645//cellular macromolecule biosynthetic process;GO:0071704//organic substance metabolic process;GO:1901360//organic cyclic compound metabolic process;GO:0043170//macromolecule metabolic process;GO:0046483//heterocycle metabolic process;GO:0034641//cellular nitrogen compound metabolic process;GO:0008152//metabolic process;GO:0044238//prima…
Unigene0092217	4900.666667	5095.333333	47.882	42.4354	49.5057	48.9336	40.5622	41.2657	46.6077	43.58716667	-0.096664894	0.690414904	0.995496164	no	YAB5	YABBY transcription factor, partial [Taxus globosa]	-	-	-	-	-	-	-
Unigene0092396	1750.666667	1978	10.9477	11.1145	10.1898	10.4246	11.2952	11.1166	10.75066667	10.94546667	0.02590734	0.923626765	1	no	BHLH13	PREDICTED: transcription factor bHLH13-like [Nelumbo nucifera]	-	-	-	-	-	-	-
Unigene0092414	213.3333333	134.6666667	1.8212	2.2314	1.2644	1.4269	0.9979	0.6453	1.772333333	1.023366667	-0.792326818	0.06912108	0.487381183	no	SPL8	SQUAMOSA promoter-binding protein-like protein [Marchantia polymorpha subsp. ruderalis] [Marchantia polymorpha]	-	-	-	-	-	-	-
Unigene0092557	4358	4885.666667	24.1182	20.832	21.1296	22.328	22.4329	21.8797	22.0266	22.21353333	0.01219207	0.959667403	1	no	ARF6	PREDICTED: auxin response factor 6 isoform X2 [Theobroma cacao]	-	-	-	-	-	-	-
Unigene0092626	1789	2416	11.3053	8.4136	4.287	8.9761	11.7715	8.5732	8.001966667	9.7736	0.288535442	0.419755691	0.897142762	no	AP2	PREDICTED: ethylene-responsive transcription factor RAP2-7-like [Eucalyptus grandis]	-	-	-	-	GO:0043227//membrane-bounded organelle;GO:0043226//organelle;GO:0043231//intracellular membrane-bounded organelle;GO:0044424//intracellular part;GO:0043229//intracellular organelle;GO:0005622//intracellular;GO:0005623//cell;GO:0044464//cell part	GO:0016628//oxidoreductase activity, acting on the CH-CH group of donors, NAD or NADP as acceptor;GO:0001071//nucleic acid binding transcription factor activity;GO:0016627//oxidoreductase activity, acting on the CH-CH group of donors;GO:0016491//oxidoreductase activity;GO:0003824//catalytic activity	GO:0009987//cellular process;GO:0071704//organic substance metabolic process;GO:0006139//nucleobase-containing compound metabolic process;GO:0034645//cellular macromolecule biosynthetic process;GO:1901360//organic cyclic compound metabolic process;GO:0016070//RNA metabolic process;GO:0090304//nucleic acid metabolic process;GO:1901362//organic cyclic compound biosynthetic process;GO:0006351//trans…
Unigene0092732	9900.333333	11765.66667	73.9522	84.5294	63.3144	78.9134	83.0617	76.6269	73.932	79.534	0.105372789	0.654329721	0.987390871	no	TCP3	PREDICTED: transcription factor TCP4-like [Cicer arietinum]	-	-	-	-	-	-	-
Unigene0092768	2407.333333	2507.666667	13.1209	14.1238	12.5457	10.6602	12.5709	14.1253	13.26346667	12.45213333	-0.091064971	0.731779375	1	no	NLP3	PREDICTED: protein NLP9 [Amborella trichopoda]	-	-	-	-	-	-	-
Unigene0092868	1578.666667	1908.666667	7.2121	4.5646	5.7983	6.3518	6.0928	6.5869	5.858333333	6.343833333	0.114864585	0.694790706	0.995496164	no	PRH	PREDICTED: pathogenesis-related homeodomain protein-like [Elaeis guineensis]	-	-	-	-	-	-	-
Unigene0092936	4100.333333	5282.666667	24.9685	10.8284	27.5778	25.2415	24.858	22.1178	21.1249	24.07243333	0.18843747	0.567887769	0.960721025	no	At3g18960	PREDICTED: B3 domain-containing protein At1g16640-like isoform X2 [Nelumbo nucifera]	-	-	-	-	-	-	-
Unigene0093135	3019.666667	3224	13.9819	15.0826	13.1722	12.7242	13.7952	14.1669	14.0789	13.5621	-0.053954032	0.829659832	1	no	ARR2	type B response regulator [Selaginella moellendorffii]	Environmental Information Processing	Signal transduction	ko04075//Plant hormone signal transduction	K14491	-	-	-
Unigene0093136	3456	3911.666667	17.556	13.9657	16.9865	16.0219	15.8779	17.3275	16.1694	16.4091	0.021229967	0.932676844	1	no	CPRF1	PREDICTED: transcription factor HBP-1a [Citrus sinensis]	-	-	-	-	-	-	-
Unigene0093234	545	779.6666667	2.9353	1.47	2.8711	2.7903	3.3687	3.0667	2.425466667	3.075233333	0.342433526	0.347536372	0.854463032	no	--	PREDICTED: trihelix transcription factor ASR3-like [Ziziphus jujuba]	-	-	-	-	-	-	-
Unigene0093380	2038.333333	1870	13.5656	15.7392	15.9756	10.7766	15.2325	11.2378	15.09346667	12.41563333	-0.281766345	0.321306109	0.839896969	no	TCP24	TB1-like TCP family transcription factor, partial [Helianthus exilis]	-	-	-	-	-	-	-
Unigene0093430	2	4	0.1199	0.2214	0	0	0.4104	0.2139	0.113766667	0.2081	0.871199051	0.711232396	0.997751158	no	Os01g0905400	B3 domain-containing protein Os12g0592300-like isoform X1 [Asparagus officinalis]	-	-	-	-	-	-	-
Unigene0093448	3058.666667	2793.333333	9.9021	7.2309	8.4148	7.148	7.2128	6.5604	8.515933333	6.973733333	-0.288233457	0.270248079	0.817922337	no	ARF19	PREDICTED: auxin response factor 7-like [Nelumbo nucifera]	-	-	-	-	-	GO:0005488//binding	GO:0042221//response to chemical;GO:0032502//developmental process;GO:0048364//root development;GO:0032501//multicellular organismal process;GO:0044271//cellular nitrogen compound biosynthetic process;GO:0044237//cellular metabolic process;GO:0009059//macromolecule biosynthetic process;GO:0090304//nucleic acid metabolic process;GO:0007275//multicellular organism development;GO:0065007//biological…
Unigene0093640	1761.666667	2090.666667	11.3183	11.978	12.4004	12.1915	13.4508	12.4392	11.8989	12.69383333	0.093299597	0.726855816	1	no	GT-1	PREDICTED: trihelix transcription factor GT-1 [Amborella trichopoda]	-	-	-	-	-	-	-
Unigene0093681	340.3333333	472	3.0264	3.0892	2.8136	3.753	4.2234	3.1747	2.9764	3.717033333	0.320583202	0.334963733	0.850000238	no	WRKY65	PREDICTED: probable WRKY transcription factor 65 isoform X1 [Gossypium hirsutum]	-	-	-	-	-	-	-
Unigene0093683	4.666666667	4	0.2622	0.5649	0.3658	0	0.2244	0.7017	0.397633333	0.3087	-0.365233219	0.815638912	1	no	WRKY35	PREDICTED: probable WRKY transcription factor 65 [Fragaria vesca subsp. vesca] [Fragaria vesca]	-	-	-	-	-	-	-
Unigene0093725	2571.333333	3806	15.6216	14.9508	16.3126	20.648	21.3861	20.3109	15.62833333	20.78166667	0.41114743	0.097376348	0.573378366	no	TGA2	PREDICTED: transcription factor HBP-1b(c38) [Amborella trichopoda]	Environmental Information Processing	Signal transduction	ko04075//Plant hormone signal transduction	K14431	-	-	-
Unigene0093802	718.6666667	857.3333333	4.1911	3.9448	4.2755	4.022	3.871	5.4262	4.137133333	4.439733333	0.101841571	0.747690756	1	no	EIN3	PREDICTED: ETHYLENE INSENSITIVE 3-like 1 protein [Juglans regia]	Environmental Information Processing	Signal transduction	ko04075//Plant hormone signal transduction	K14514	-	-	-
Unigene0093830	591.6666667	738.6666667	4.7506	5.5584	4.7717	5.3554	5.5888	6.0639	5.0269	5.669366667	0.173518589	0.577522021	0.963296575	no	APL	PREDICTED: myb family transcription factor PHL7 isoform X1 [Elaeis guineensis]	-	-	-	-	-	-	-
Unigene0093837	11052	12609.66667	66.5928	61.9479	70.3094	65.3028	61.8028	76.8132	66.28336667	67.97293333	0.036313501	0.875606701	1	no	NAC078	PREDICTED: NAC domain-containing protein 78 [Amborella trichopoda]	-	-	-	-	-	-	-
Unigene0093876	181.6666667	309.6666667	4.0953	3.6564	4.4026	6.5093	5.1036	7.0254	4.051433333	6.212766667	0.616803471	0.082395131	0.530201961	no	MADS14	PREDICTED: agamous-like MADS-box protein AGL6 isoform X1 [Gossypium hirsutum]	-	-	-	-	-	-	-
Unigene0093879	12.33333333	3.333333333	0.6856	0.9207	0.6521	0.1148	0.1067	0.3336	0.7528	0.185033333	-2.024481436	0.051443586	0.41841413	no	MADS18	AGAMOUS-like protein [Taxus mairei]	-	-	-	-	GO:0043226//organelle;GO:0043227//membrane-bounded organelle;GO:0043229//intracellular organelle;GO:0005623//cell;GO:0044424//intracellular part;GO:0044464//cell part;GO:0005622//intracellular;GO:0043231//intracellular membrane-bounded organelle	GO:0005515//protein binding;GO:0005488//binding	GO:0044271//cellular nitrogen compound biosynthetic process;GO:0016070//RNA metabolic process;GO:0010467//gene expression;GO:0006725//cellular aromatic compound metabolic process;GO:0090304//nucleic acid metabolic process;GO:0034654//nucleobase-containing compound biosynthetic process;GO:0097659//nucleic acid-templated transcription;GO:0009059//macromolecule biosynthetic process;GO:0006807//nitro…
Unigene0093880	7.666666667	4.666666667	0.2665	1.0661	0.6505	0.5728	0.152	0.3962	0.661033333	0.373666667	-0.822971151	0.479438864	0.928719456	no	1-Sep	mads-box protein soc1 [Nicotiana attenuata]	-	-	-	-	-	-	-
Unigene0093950	25	68.66666667	0.7894	1.154	0.4474	2.303	1.3794	2.3767	0.796933333	2.0197	1.341610068	0.018218332	0.220150122	no	ERF5	transcription factor 3, partial [Pinus densata]	-	-	-	-	-	-	-
Unigene0093951	31.33333333	101.6666667	1.184	1.0932	0.9473	3.5933	3.5766	2.2677	1.074833333	3.145866667	1.549344557	0.001174167	0.028733634	yes	PTI5(ERF)	ethylene responsive factor 1-like protein [Pinus massoniana]	-	-	-	-	-	-	-
Unigene0094075	168.6666667	241.3333333	1.1839	2.1778	1.1149	2.5339	1.3952	1.9741	1.4922	1.967733333	0.399093807	0.352558575	0.854750213	no	E2FE	PREDICTED: E2F transcription factor-like E2FE isoform X2 [Nelumbo nucifera]	-	-	-	-	-	-	-
Unigene0094076	48.33333333	43	0.8488	1.4481	0.2703	0.867	0.5369	0.7242	0.855733333	0.709366667	-0.27062975	0.672552936	0.991900399	no	E2FE	PREDICTED: E2F transcription factor-like E2FE [Camelina sativa]	-	-	-	-	GO:0043229//intracellular organelle;GO:0044464//cell part;GO:0043227//membrane-bounded organelle;GO:0043231//intracellular membrane-bounded organelle;GO:0005622//intracellular;GO:0043226//organelle;GO:0044424//intracellular part;GO:0043234//protein complex;GO:0005623//cell;GO:0032991//macromolecular complex	GO:0001071//nucleic acid binding transcription factor activity	GO:0097659//nucleic acid-templated transcription;GO:0034654//nucleobase-containing compound biosynthetic process;GO:0044249//cellular biosynthetic process;GO:0006807//nitrogen compound metabolic process;GO:0019438//aromatic compound biosynthetic process;GO:0044238//primary metabolic process;GO:0071704//organic substance metabolic process;GO:0009058//biosynthetic process;GO:0018130//heterocycle bi…
Unigene0094086	1533	2487	12.9301	8.8278	13.903	15.5604	18.0781	17.8705	11.88696667	17.16966667	0.530481418	0.068903424	0.486544122	no	CAB8	myb transcription factor [Medicago truncatula]	-	-	-	-	-	-	-
Unigene0094110	1020.333333	1273.333333	4.2945	4.7477	3.8392	4.7532	4.8372	4.9462	4.2938	4.845533333	0.174400474	0.548901073	0.953713133	no	TKI1	PREDICTED: TSL-kinase interacting protein 1 [Amborella trichopoda]	-	-	-	-	-	-	-
Unigene0094201	9.666666667	9.333333333	1.7676	0.192	1.0879	0.479	1.1569	0.9275	1.015833333	0.854466667	-0.249567603	0.840628221	1	no	BLH2	PREDICTED: BEL1-like homeodomain protein 2 isoform X2 [Phoenix dactylifera]	-	-	-	-	GO:0043227//membrane-bounded organelle;GO:0044424//intracellular part;GO:0005622//intracellular;GO:0043229//intracellular organelle;GO:0005623//cell;GO:0043226//organelle;GO:0044464//cell part;GO:0043231//intracellular membrane-bounded organelle	GO:0097159//organic cyclic compound binding;GO:0003677//DNA binding;GO:0001071//nucleic acid binding transcription factor activity;GO:1901363//heterocyclic compound binding;GO:0003676//nucleic acid binding;GO:0005488//binding	GO:0044767//single-organism developmental process;GO:1901360//organic cyclic compound metabolic process;GO:0006807//nitrogen compound metabolic process;GO:0044260//cellular macromolecule metabolic process;GO:0048856//anatomical structure development;GO:0009058//biosynthetic process;GO:0044238//primary metabolic process;GO:0071704//organic substance metabolic process;GO:0034641//cellular nitrogen …
Unigene0094202	300	287.6666667	3.1395	3.9569	3.9626	2.9153	2.879	3.7675	3.686333333	3.187266667	-0.209866802	0.547929904	0.953458789	no	BLH4	PREDICTED: BEL1-like homeodomain protein 4 [Vigna radiata var. radiata] [Vigna radiata]	-	-	-	-	-	-	-
Unigene0094204	3705.666667	4111.333333	20.4749	22.6804	21.8259	21.43	20.5581	23.045	21.6604	21.6777	0.00115181	0.996654297	1	no	BEL1	BEL1-like homeodomain protein 4 [Anthurium amnicola]	-	-	-	-	-	-	-
Unigene0094271	7475	8719.666667	33.1694	28.0294	33.0015	35.4796	30.6787	32.5991	31.4001	32.91913333	0.068157201	0.771251921	1	no	--	PREDICTED: transcription factor bHLH143 [Amborella trichopoda]	-	-	-	-	-	-	-
Unigene0094321	1621	1896.333333	6.0145	3.1425	5.3107	4.6542	5.1018	5.3015	4.822566667	5.019166667	0.057646671	0.855818346	1	no	ERF1	PREDICTED: ethylene-responsive transcription factor 1 [Theobroma cacao]	-	-	-	-	-	-	-
Unigene0094474	732	923.6666667	4.5511	1.9147	3.8487	4.8455	2.7668	4.0221	3.438166667	3.878133333	0.173722924	0.659846275	0.98825728	no	--	PREDICTED: afadin [Amborella trichopoda]	-	-	-	-	-	-	-
Unigene0094654	127	228	1.9683	0.9699	1.2495	2.7506	1.8834	2.1208	1.3959	2.2516	0.68975496	0.095891568	0.56862247	no	dhx29	ATP-dependent RNA helicase A [Klebsormidium flaccidum]	-	-	-	-	-	-	-
Unigene0094670	399	691.3333333	4.484	4.304	3.5214	5.3443	9.1874	4.5873	4.103133333	6.373	0.635246625	0.089862859	0.55293077	no	RAV1	PREDICTED: AP2/ERF and B3 domain-containing transcription factor RAV1-like [Nelumbo nucifera]	-	-	-	-	-	-	-
Unigene0094671	15	17.33333333	0.7395	0.9559	0.4643	0.3179	1.2659	0.6597	0.7199	0.747833333	0.05492026	0.969699319	1	no	RAV2	PREDICTED: AP2/ERF and B3 domain-containing transcription factor RAV1 [Vitis vinifera]	-	-	-	-	-	-	-
Unigene0094672	1119	1131.666667	11.4882	14.7465	10.4445	9.4535	17.4026	6.4871	12.2264	11.1144	-0.137569604	0.723485368	1	no	RAV2	PREDICTED: AP2/ERF and B3 domain-containing transcription factor RAV1 [Vitis vinifera]	-	-	-	-	-	-	-
Unigene0094673	904	704.3333333	9.1963	8.8084	7.5215	4.4035	9.2373	4.1274	8.508733333	5.922733333	-0.522681247	0.171326788	0.719855106	no	RAV2	PREDICTED: AP2/ERF and B3 domain-containing transcription factor RAV1-like [Nelumbo nucifera]	-	-	-	-	-	-	-
Unigene0094750	1398.666667	1804	10.6067	12.3847	9.8794	12.8723	11.3647	14.1926	10.95693333	12.80986667	0.225411391	0.427207921	0.902166947	no	BHLH	transcription factor bHLH-1 [Picea abies]	-	-	-	-	-	-	-
Unigene0094970	2.333333333	0	0	0.3734	0.3173	0	0	0	0.230233333	0.001	-7.846952913	0.231898932	0.79429949	no	RL4	PREDICTED: protein RADIALIS-like 6 [Amborella trichopoda]	-	-	-	-	-	-	-
Unigene0094971	120.3333333	62	4.1604	2.1473	2.9741	1.4998	1.504	1.2678	3.093933333	1.423866667	-1.119628054	0.011850507	0.165427338	no	RL1	PREDICTED: protein RADIALIS-like 3 isoform X2 [Nelumbo nucifera]	-	-	-	-	-	-	-
Unigene0094972	70.66666667	70.33333333	1.7987	1.3839	2.5949	4.3939	0.2566	0.6078	1.925833333	1.752766667	-0.135848901	0.874348485	1	no	RL6	PREDICTED: protein RADIALIS-like 1 [Jatropha curcas]	-	-	-	-	GO:0043231//intracellular membrane-bounded organelle;GO:0005622//intracellular;GO:0044424//intracellular part;GO:0043229//intracellular organelle;GO:0044464//cell part;GO:0005623//cell;GO:0043226//organelle;GO:0043227//membrane-bounded organelle	GO:0005488//binding	-
Unigene0094973	87	147	1.3686	1.7997	2.1913	4.2984	2.2007	1.7018	1.786533333	2.733633333	0.613656913	0.196962895	0.753080884	no	RAD	PREDICTED: protein RADIALIS-like 1 [Jatropha curcas]	-	-	-	-	GO:0044424//intracellular part;GO:0043231//intracellular membrane-bounded organelle;GO:0005623//cell;GO:0043226//organelle;GO:0043229//intracellular organelle;GO:0005622//intracellular;GO:0043227//membrane-bounded organelle;GO:0044464//cell part	GO:0005488//binding	-
Unigene0095150	731.3333333	595.6666667	5.5278	7.3102	5.6667	4.3877	5.0549	4.1872	6.168233333	4.543266667	-0.441127354	0.168969326	0.71580009	no	GAM1	MYB33 [Pinus tabuliformis]	-	-	-	-	-	-	-
Unigene0095151	176.3333333	226.3333333	1.4306	1.5462	1.4088	1.4576	2.1176	1.4789	1.461866667	1.6847	0.204679976	0.578780825	0.963971167	no	GAM1	myb domain protein 33 [Larix kaempferi]	-	-	-	-	-	-	-
Unigene0095199	5044.333333	5289.666667	36.3207	38.5428	36.7964	34.8748	33.68	37.0524	37.21996667	35.2024	-0.080402972	0.732417693	1	no	SUF4	Zinc finger protein 207, partial [Anthurium amnicola]	-	-	-	-	-	-	-
Unigene0095523	1105.333333	973.6666667	6.7944	6.3323	5.9322	3.6183	6.3439	5.0681	6.352966667	5.0101	-0.34259105	0.290505388	0.834862188	no	COL9	PREDICTED: zinc finger protein CONSTANS-LIKE 9 isoform X1 [Juglans regia]	-	-	-	-	-	-	-
Unigene0095654	1048.333333	1197	8.2598	7.3	8.345	8.3451	7.2665	8.9363	7.968266667	8.182633333	0.038299276	0.897060351	1	no	BHLH82	transcription factor bHLH7-like [Asparagus officinalis]	-	-	-	-	-	-	-
Unigene0095878	165.3333333	312	1.5264	0.5118	1.7639	2.4697	1.5794	2.3032	1.267366667	2.117433333	0.740482571	0.122424939	0.634470874	no	Os01g0723500	PREDICTED: B3 domain-containing protein Os01g0723500 [Amborella trichopoda]	-	-	-	-	-	-	-
Unigene0096017	1405	1380	11.4331	7.7882	9.9565	8.2146	10.1971	7.1642	9.725933333	8.5253	-0.1900861	0.536047925	0.949629228	no	GATA12	GATA type zinc finger transcription factor family protein [Medicago truncatula]	-	-	-	-	-	GO:1901363//heterocyclic compound binding;GO:0005488//binding;GO:0003676//nucleic acid binding;GO:0003677//DNA binding;GO:0097159//organic cyclic compound binding	-
Unigene0096045	2605	2750	12.8248	13.9553	12.8477	12.4269	11.9412	13.3961	13.20926667	12.58806667	-0.069493651	0.784902555	1	no	--	PREDICTED: mediator-associated protein 1 [Citrus sinensis]	-	-	-	-	-	-	-
Unigene0096325	228	287.3333333	2.7852	4.2379	3.4188	3.7844	3.7155	4.4277	3.480633333	3.975866667	0.191919534	0.595601659	0.970449623	no	Os12g0591400	PREDICTED: B3 domain-containing protein REM16-like isoform X1 [Musa acuminata subsp. malaccensis] [Musa acuminata]	-	-	-	-	-	-	-
Unigene0096332	4802.666667	5851.333333	26.8905	25.3561	27.7594	28.3321	30.7269	28.4498	26.66866667	29.1696	0.129319905	0.581854748	0.96499409	no	BLH1	PREDICTED: BEL1-like homeodomain protein 1 [Vitis vinifera]	-	-	-	-	-	-	-
Unigene0096374	4098.666667	4609	16.5348	16.3198	16.6393	16.2958	18.132	15.5934	16.49796667	16.67373333	0.01528894	0.949581017	1	no	GT-1	PREDICTED: trihelix transcription factor GT-1-like [Nelumbo nucifera]	-	-	-	-	-	-	-
Unigene0096448	3325.333333	3303	14.2769	15.696	13.7999	12.7383	12.845	13.6781	14.59093333	13.08713333	-0.156923053	0.527182933	0.945022669	no	HDG1	TPA_inf: class IV HD-Zip protein HDZ43 [Physcomitrella patens]	-	-	-	-	-	-	-
Unigene0096596	637.3333333	1165.333333	6.3984	8.8121	6.9792	11.2992	12.8759	12.5232	7.396566667	12.23276667	0.725823071	0.019398728	0.22990633	no	BEH4	PREDICTED: BES1/BZR1 homolog protein 4-like [Pyrus x bretschneideri]	-	-	-	-	-	-	-
Unigene0096597	4525	3580.333333	33.0427	27.9246	36.726	22.4223	26.7237	19.8812	32.56443333	23.00906667	-0.501094658	0.052420274	0.42254529	no	RGL2	SCL11, partial [Pinus radiata]	-	-	-	-	-	-	-
Unigene0096694	6.666666667	25.33333333	0.2969	0.0914	0.2761	0.8814	1.0448	0.2943	0.221466667	0.740166667	1.740760593	0.049924154	0.411359485	no	DIVARICATA	PREDICTED: transcription factor DIVARICATA-like [Lupinus angustifolius]	-	-	-	-	-	-	-
Unigene0096824	2389.666667	2888.666667	21.562	22.6441	17.5509	20.616	27.6856	18.9685	20.58566667	22.42336667	0.123362731	0.658564494	0.988051505	no	BHLH49	PREDICTED: transcription factor bHLH63 [Prunus mume]	-	-	-	-	-	-	-
Unigene0096829	31.66666667	66.66666667	0.5591	0.8053	0.7254	0.7005	1.9524	1.2768	0.6966	1.3099	0.9110543	0.102584018	0.588157907	no	--	--	-	-	-	-	-	-	-
Unigene0096852	1963	2340	10.6913	6.7421	9.2773	8.4504	9.7868	10.1801	8.903566667	9.472433333	0.089351702	0.756525582	1	no	LD	PREDICTED: homeobox protein LUMINIDEPENDENS-like [Nelumbo nucifera]	-	-	-	-	-	-	-
Unigene0097421	1483.333333	1583.666667	8.8927	6.3258	7.2273	7.3814	7.28	6.8384	7.481933333	7.1666	-0.062122278	0.829499003	1	no	TBP1	Myb_DNA-binding domain-containing protein [Cephalotus follicularis]	-	-	-	-	-	-	-
Unigene0097467	2608.333333	2721.666667	13.4102	11.1173	12.9781	10.8214	12.0614	12.187	12.50186667	11.68993333	-0.096876819	0.707992246	0.996968996	no	ARR2	PREDICTED: two-component response regulator ARR1 isoform X2 [Amborella trichopoda]	Environmental Information Processing	Signal transduction	ko04075//Plant hormone signal transduction	K14491	-	-	GO:0009987//cellular process
Unigene0097599	4099.666667	3809.666667	39.9477	45.8195	46.3878	36.3416	38.8592	35.3149	44.05166667	36.83856667	-0.257979674	0.290604582	0.834862188	no	Os02g0194200	PREDICTED: zinc finger CCCH domain-containing protein 14-like [Nelumbo nucifera]	-	-	-	-	-	-	-
Unigene0097623	5981.333333	5569.333333	40.8035	34.2787	42.6024	34.6432	31.0295	32.6652	39.2282	32.7793	-0.259106092	0.278958208	0.826656536	no	NAC078	PREDICTED: NAC domain-containing protein 86-like [Camelina sativa]	-	-	-	-	-	-	-
Unigene0097634	1494.666667	1615.333333	9.404	5.4692	8.4056	6.8062	7.9952	7.5987	7.7596	7.4667	-0.055511518	0.858098583	1	no	CMTA5	PREDICTED: calmodulin-binding transcription activator 5-like isoform X2 [Nelumbo nucifera]	-	-	-	-	-	-	-
Unigene0098103	655	689.6666667	7.2443	6.6585	7.1712	5.3453	7.6576	6.859	7.024666667	6.620633333	-0.085460536	0.791036021	1	no	Os08g0159800	PREDICTED: zinc finger CCCH domain-containing protein 39-like isoform X1 [Nelumbo nucifera]	-	-	-	-	-	-	-
Unigene0098213	1837	2258.666667	8.7011	5.3419	6.3384	6.4809	7.3514	8.5965	6.7938	7.476266667	0.138099281	0.642867902	0.98458109	no	SUVR5	PREDICTED: histone-lysine N-methyltransferase SUVR5 [Amborella trichopoda]	-	-	-	-	-	-	-
Unigene0098216	167.3333333	139.6666667	1.7864	1.3758	1.2867	0.9593	0.7068	1.6896	1.482966667	1.118566667	-0.406834926	0.356350403	0.858419617	no	ZAT4	PREDICTED: zinc finger protein 37-like isoform X2 [Gossypium hirsutum]	-	-	-	-	-	-	-
Unigene0098455	7601.333333	7581	54.0781	54.7772	52.9688	47.6873	48.587	49.1196	53.94136667	48.46463333	-0.154459738	0.498426366	0.932648729	no	HUA1	zinc finger CCCH domain-containing protein 8 [Asparagus officinalis]	-	-	-	-	-	-	-
Unigene0098456	9	5.333333333	1.2792	0.0591	0.4015	0.1768	0.219	0.5135	0.579933333	0.3031	-0.936093212	0.469174378	0.924236072	no	HUA1	enhancer of AG-4 1 family protein [Populus trichocarpa]	-	-	-	-	-	-	-
Unigene0099054	213.3333333	34.33333333	1.9547	6.8417	9.7374	0.9676	0	1.7437	6.177933333	0.903766667	-2.77310205	0.004057616	0.075281548	no	MADS8	TM8-like MADS-box transcription factor [Cryptomeria japonica]	-	-	-	-	-	-	-
Unigene0099201	13284.33333	17319.66667	60.5232	48.2354	53.006	58.5773	67.1455	63.3692	53.92153333	63.03066667	0.2251924	0.330385502	0.847238351	no	LHW	PREDICTED: transcription factor LHW [Amborella trichopoda]	-	-	-	-	-	-	-
Unigene0099392	198.6666667	146.3333333	2.7829	0.682	2.6258	0.9976	1.0826	1.8686	2.030233333	1.316266667	-0.625193746	0.24130019	0.801640569	no	--	PREDICTED: transcription activator GLK1-like [Prunus mume]	-	-	-	-	-	-	-
Unigene0099471	7.666666667	9	0.2914	0.1537	0.5227	0.3452	0.2138	0.4456	0.3226	0.334866667	0.053840336	1	1	no	--	MADS-box transcription factor family protein [Medicago truncatula]	-	-	-	-	-	-	-
Unigene0099759	6139.333333	5800.333333	23.9268	25.8498	29.3075	21.8994	23.3574	21.8202	26.36136667	22.359	-0.237569501	0.315560367	0.8390487	no	NFYB3	NF-YB3 [Picea wilsonii]	-	-	-	-	GO:0043227//membrane-bounded organelle;GO:0044464//cell part;GO:0005622//intracellular;GO:0005623//cell;GO:0043229//intracellular organelle;GO:0043231//intracellular membrane-bounded organelle;GO:0044424//intracellular part;GO:0043226//organelle	GO:1901363//heterocyclic compound binding;GO:0005515//protein binding;GO:0003677//DNA binding;GO:0003676//nucleic acid binding;GO:0005488//binding;GO:0046983//protein dimerization activity;GO:0097159//organic cyclic compound binding	GO:0006351//transcription, DNA-templated;GO:1901360//organic cyclic compound metabolic process;GO:0044237//cellular metabolic process;GO:0006807//nitrogen compound metabolic process;GO:0032774//RNA biosynthetic process;GO:0019438//aromatic compound biosynthetic process;GO:0097659//nucleic acid-templated transcription;GO:0009987//cellular process;GO:0044249//cellular biosynthetic process;GO:003465…
Unigene0099788	8.666666667	7.333333333	0.8562	1.6798	0.112	0.3944	0.0916	1.6229	0.882666667	0.702966667	-0.328412435	0.845365492	1	no	--	unknown [Picea sitchensis]	-	-	-	-	-	-	-
Unigene0099792	119.3333333	195.3333333	3.344	4.9053	2.6486	6.3919	3.2098	6.8024	3.632633333	5.468033333	0.590006286	0.185549284	0.738803897	no	--	unknown [Picea sitchensis]	-	-	-	-	-	-	-
Unigene0099852	1705.333333	2346.666667	10.8932	9.8038	10.1772	12.8597	13.154	12.1848	10.2914	12.73283333	0.307114232	0.245324806	0.803865903	no	GATA26	PREDICTED: GATA transcription factor 26-like [Populus euphratica]	-	-	-	-	-	-	-
Unigene0100064	4652.666667	3889.333333	43.9585	49.5555	44.4182	29.8281	35.201	38.891	45.9774	34.64003333	-0.408484566	0.100158933	0.58071335	no	ERF9	ERF1 [Pinus tabuliformis]	-	-	-	-	-	-	-
Unigene0100065	5385	7650.333333	45.5831	35.0167	43.6147	54.1536	49.5002	54.6338	41.40483333	52.76253333	0.349714647	0.146173652	0.681091385	no	NAC045	PREDICTED: NAC domain-containing protein 45 [Nelumbo nucifera]	-	-	-	-	-	GO:0001071//nucleic acid binding transcription factor activity	GO:0032501//multicellular organismal process;GO:0044699//single-organism process;GO:0044707//single-multicellular organism process
Unigene0100205	80.66666667	63	0.8132	2.2524	0.8863	1.2018	0.667	0.9974	1.3173	0.9554	-0.463407158	0.392203151	0.881464063	no	BHLH137	BnaA03g13450D [Brassica napus]	-	-	-	-	-	-	-
Unigene0100362	798.3333333	892.3333333	5.626	7.8332	5.7579	6.7223	6.2311	6.5528	6.4057	6.502066667	0.021542115	0.946729913	1	no	ZFWD2	PREDICTED: zinc finger CCCH domain-containing protein 17 [Amborella trichopoda]	-	-	-	-	-	-	-
Unigene0100518	76.33333333	77.66666667	0.9836	0.3632	1.0399	0.744	0.4697	0.9421	0.795566667	0.7186	-0.146793895	0.787917003	1	no	CRF2	AP2 domain-containing protein [Cephalotus follicularis]	-	-	-	-	GO:0005622//intracellular;GO:0044424//intracellular part;GO:0043231//intracellular membrane-bounded organelle;GO:0005623//cell;GO:0043227//membrane-bounded organelle;GO:0043226//organelle;GO:0044464//cell part;GO:0043229//intracellular organelle	GO:0001071//nucleic acid binding transcription factor activity	GO:0044271//cellular nitrogen compound biosynthetic process;GO:0032774//RNA biosynthetic process;GO:0009058//biosynthetic process;GO:0006351//transcription, DNA-templated;GO:0018130//heterocycle biosynthetic process;GO:0006807//nitrogen compound metabolic process;GO:0097659//nucleic acid-templated transcription;GO:0008152//metabolic process;GO:0044260//cellular macromolecule metabolic process;GO:…
Unigene0100589	536	694.6666667	8.2615	8.8815	8.4917	8.7879	11.1252	9.9513	8.5449	9.9548	0.220328723	0.485048943	0.929742655	no	At2g28450	PREDICTED: zinc finger CCCH domain-containing protein 24 isoform X2 [Nelumbo nucifera]	-	-	-	-	-	-	-
Unigene0100690	10337.33333	13527.33333	95.5918	109.543	101.793	130.8696	132.4642	98.8757	102.3092667	120.7365	0.238925062	0.316637781	0.839896969	no	RAP2-4	transcription factor 2 [Pinus tabuliformis]	-	-	-	-	-	-	-
Unigene0100850	738	755	3.1132	2.1259	2.4274	2.4497	2.2518	2.3408	2.5555	2.347433333	-0.122521405	0.701282767	0.995496164	no	mybL	PREDICTED: myb-like protein L, partial [Amborella trichopoda]	-	-	-	-	-	-	-
Unigene0101007	52.66666667	68	1.1446	2.0549	1.7299	2.5192	0.5987	2.7229	1.643133333	1.946933333	0.244753931	0.687618937	0.995232991	no	ANR1	MADS-box transcription factor 50 [Morus notabilis]	-	-	-	-	-	-	-
Unigene0101008	66.33333333	46.66666667	1.3679	4.4689	4.4588	3.5383	0.8556	2.2528	3.431866667	2.215566667	-0.631317765	0.329985188	0.846834424	no	AGL14	TM8-like MADS-box transcription factor [Cryptomeria japonica]	-	-	-	-	-	-	-
Unigene0101009	13	0.666666667	0.1075	2.0852	1.9129	0.1982	0	0	1.368533333	0.066066667	-4.372564208	0.011757456	0.16466372	no	ANR1	MADS-box transcription factor 57 [Ananas comosus]	-	-	-	-	-	-	-
Unigene0101010	851.3333333	606.3333333	6.6487	15.2117	21.7144	13.6277	4.6024	9.885	14.52493333	9.3717	-0.632148864	0.193693351	0.747018627	no	AGL16	TM8-like MADS-box transcription factor [Cryptomeria japonica]	-	-	-	-	-	-	-
Unigene0101102	5793.333333	6569.333333	46.9324	45.4605	36.8524	40.1456	47.8815	44.1321	43.08176667	44.05306667	0.032165041	0.894565769	1	no	WRKY2	PREDICTED: WRKY transcription factor SUSIBA2-like [Ziziphus jujuba]	Organismal Systems	Environmental adaptation	ko04626//Plant-pathogen interaction	K18835	-	-	-
Unigene0101216	459.6666667	384	5.0959	8.1098	4.8267	4.5465	5.4978	3.6486	6.0108	4.5643	-0.397163398	0.284414047	0.831834641	no	ERF1A	PREDICTED: ethylene-responsive transcription factor 1A-like [Lupinus angustifolius]	-	-	-	-	-	-	-
Unigene0101262	1818.333333	1672.333333	12.8839	13.1796	11.6795	10.1481	10.5761	10.5907	12.581	10.4383	-0.269359828	0.319509758	0.839896969	no	GT-2	PREDICTED: trihelix transcription factor GTL1 isoform X2 [Ricinus communis]	-	-	-	-	-	-	-
Unigene0101264	2	0	0.6517	0	0	0	0	0	0.217233333	0.001	-7.763101684	0.396035134	0.883427514	no	GT-2	PREDICTED: trihelix transcription factor GT-2-like [Oryza brachyantha]	-	-	-	-	-	-	-
Unigene0101556	11298	8265.666667	43.3779	19.7063	44.5676	27.4697	19.1079	23.5251	35.88393333	23.36756667	-0.618830527	0.051446064	0.41841413	no	NFYA7	NF-YA7 [Pinus tabuliformis]	-	-	-	-	-	-	-
Unigene0101925	5.333333333	55.33333333	0.0626	0.1925	0.0655	0.8646	1.1245	1.079	0.106866667	1.0227	3.258499175	6.21E-06	0.000323113	yes	MYB12	MYB-like protein [Taxus globosa]	-	-	-	-	-	-	-
Unigene0101973	2787.333333	2817.333333	20.8466	25.6355	19.9403	21.2782	19.7678	19.8091	22.1408	20.28503333	-0.126291678	0.626685278	0.979033441	no	Os02g0194200	PREDICTED: zinc finger CCCH domain-containing protein 14-like [Juglans regia]	-	-	-	-	-	-	-
Unigene0102083	757.6666667	1182.666667	5.6999	5.2176	7.4335	9.8368	9.3609	6.4174	6.117	8.538366667	0.481135842	0.143675116	0.676477066	no	NAM-B2	PREDICTED: NAC transcription factor 56 [Arachis ipaensis]	-	-	-	-	-	-	GO:0009059//macromolecule biosynthetic process;GO:0009987//cellular process;GO:0046483//heterocycle metabolic process;GO:1901360//organic cyclic compound metabolic process;GO:0071704//organic substance metabolic process;GO:0006807//nitrogen compound metabolic process;GO:0009058//biosynthetic process;GO:0044237//cellular metabolic process;GO:0044260//cellular macromolecule metabolic process;GO:000…
Unigene0102259	2691.333333	3188.333333	19.9428	16.1621	18.1804	17.7724	21.253	18.5774	18.0951	19.20093333	0.08557736	0.740126002	1	no	ARR1	PREDICTED: two-component response regulator ORR21-like isoform X1 [Nelumbo nucifera]	Environmental Information Processing	Signal transduction	ko04075//Plant hormone signal transduction	K14491	-	-	-
Unigene0102396	2047	1885.666667	14.2733	15.8864	15.638	11.708	14.0797	12.139	15.2659	12.64223333	-0.272061298	0.312535045	0.838508349	no	SCL6	HAM1 [Pinus tabuliformis]	-	-	-	-	-	-	-
Unigene0102397	424.3333333	685.3333333	3.8059	2.6929	2.4414	4.8171	4.1281	4.0804	2.980066667	4.341866667	0.542970818	0.110134688	0.606963792	no	SCL6	HAM2 [Pinus tabuliformis]	-	-	-	-	-	-	-
Unigene0102456	980.3333333	1405.333333	5.6059	3.8024	4.7349	6.0708	6.154	5.93	4.7144	6.0516	0.36024246	0.230350331	0.79226351	no	--	PREDICTED: myb-like protein J [Fragaria vesca subsp. vesca] [Fragaria vesca]	-	-	-	-	-	-	-
Unigene0102616	0	0	0	0	0	0	0	0	0.001	0.001	0	notest	notest	notest	--	PREDICTED: trihelix transcription factor ASR3 [Citrus sinensis]	-	-	-	-	-	-	-
Unigene0102692	795.3333333	920.3333333	2.8552	1.6964	1.7767	1.8087	2.3864	2.3582	2.109433333	2.184433333	0.050403584	0.883595711	1	no	ncor1	Duplicated homeodomain-like superfamily protein isoform 2 [Theobroma cacao]	-	-	-	-	-	-	-
Unigene0102694	0	1.333333333	0	0	0	0	0.0112	0	0.001	0.003733333	1.900464326	0.494635329	0.931806619	no	ncor1	Duplicated homeodomain-like superfamily protein isoform 2 [Theobroma cacao]	-	-	-	-	-	-	-
Unigene0102762	1166.666667	1548.333333	8.3707	9.4451	10.7986	11.8836	11.5422	10.7031	9.538133333	11.3763	0.25425256	0.375132655	0.871562364	no	WOX8	HD transcription factor [Gnetum gnemon]	-	-	-	-	-	-	-
Unigene0102802	2956.333333	3479.666667	19.6319	17.1194	16.2514	17.0545	20.3477	18.6687	17.66756667	18.6903	0.081186373	0.750098753	1	no	COL14	PREDICTED: zinc finger protein CONSTANS-LIKE 15-like isoform X1 [Malus domestica]	-	-	-	-	-	-	-
Unigene0103873	2795.333333	2845	68.4349	84.96	68.8922	66.1555	70.1204	68.3173	74.0957	68.19773333	-0.119666031	0.642306304	0.984325195	no	EREBP1	PREDICTED: ethylene-responsive transcription factor RAP2-12-like, partial [Juglans regia]	-	-	-	-	GO:0043229//intracellular organelle;GO:0043227//membrane-bounded organelle;GO:0005622//intracellular;GO:0044464//cell part;GO:0005623//cell;GO:0043231//intracellular membrane-bounded organelle;GO:0044424//intracellular part;GO:0043226//organelle	GO:0001071//nucleic acid binding transcription factor activity	GO:1901576//organic substance biosynthetic process;GO:0097659//nucleic acid-templated transcription;GO:0046483//heterocycle metabolic process;GO:0034641//cellular nitrogen compound metabolic process;GO:0044238//primary metabolic process;GO:0034654//nucleobase-containing compound biosynthetic process;GO:0018130//heterocycle biosynthetic process;GO:0032774//RNA biosynthetic process;GO:1901362//orga…
Unigene0103888	558	601.3333333	5.7352	6.5412	4.4925	5.1896	5.4599	5.7363	5.589633333	5.461933333	-0.033341944	0.920197566	1	no	MYC4	JAMYC4 [Taxus cuspidata]	Environmental Information Processing	Signal transduction	ko04075//Plant hormone signal transduction	K13422	-	-	-
Unigene0104145	6827	6974	50.5792	48.5627	48.8102	48.5926	41.6181	46.1047	49.31736667	45.43846667	-0.118181617	0.610536605	0.973192585	no	CPRF1	PREDICTED: G-box-binding factor 1-like isoform X2 [Nelumbo nucifera]	-	-	-	-	-	-	-
Unigene0104510	86.66666667	146.3333333	6.7432	10.3471	7.0553	8.3123	12.7621	15.843	8.048533333	12.3058	0.612540637	0.159717135	0.702688293	no	SPL15	PREDICTED: squamosa promoter-binding-like protein 14 [Ipomoea nil]	-	-	-	-	-	-	-
Unigene0104719	7.666666667	2.333333333	0	0.3866	0.2336	0.0257	0.0478	0.0996	0.206733333	0.0577	-1.841127801	0.272862468	0.820875563	no	GRF3	growth regulating factor 1 [Larix kaempferi]	-	-	-	-	-	-	-
Unigene0104831	4.666666667	20	0.1991	0.2452	0	0.795	0.5397	0.4441	0.1481	0.592933333	2.001298263	0.05056457	0.414199524	no	GGM13	B-class MADS-box transcription factor [Cryptomeria japonica]	-	-	-	-	-	-	-
Unigene0104902	3.333333333	27	0.1328	0.1226	0.0695	1.0397	0.7954	0.5626	0.1083	0.799233333	2.883583511	0.001247128	0.030203467	yes	GeBP	PREDICTED: mediator-associated protein 1-like [Sesamum indicum]	-	-	-	-	-	-	-
Unigene0105807	0	3.333333333	0	0	0	0	0.8059	0	0.001	0.268633333	8.069494522	0.314527547	0.838508349	no	CREA	DNA-binding protein creA [Anthurium amnicola]	-	-	-	-	-	-	-
Unigene0105835	0.666666667	5.666666667	0.1821	0	0	0.2516	0.5454	0.5684	0.0607	0.455133333	2.90652083	0.132789973	0.656577157	no	ODO1	PREDICTED: protein ODORANT1 [Vigna angularis]	-	-	-	-	GO:0043227//membrane-bounded organelle;GO:0043231//intracellular membrane-bounded organelle;GO:0043229//intracellular organelle;GO:0043226//organelle;GO:0005622//intracellular;GO:0044464//cell part;GO:0044424//intracellular part;GO:0005623//cell	GO:0005488//binding	GO:0065007//biological regulation;GO:0042221//response to chemical;GO:0001101//response to acid chemical;GO:0050789//regulation of biological process;GO:0050896//response to stimulus;GO:0044087//regulation of cellular component biogenesis
Unigene0105975	4	5.666666667	0	0.2036	0.4614	0.5078	0.0944	0.2459	0.221666667	0.2827	0.350880043	0.888888426	1	no	AP2	APETALA2-related transcription factor 1 [Picea abies]	-	-	-	-	-	-	-
Unigene0106212	57	13.66666667	1.2727	2.6299	1.1097	0.3629	0.5706	0.1622	1.670766667	0.365233333	-2.193619921	0.001091532	0.027066934	yes	DREB2C(ERF)	PREDICTED: dehydration-responsive element-binding protein 2C isoform X1 [Tarenaya hassleriana]	-	-	-	-	GO:0044464//cell part;GO:0005623//cell;GO:0005622//intracellular;GO:0043227//membrane-bounded organelle;GO:0044424//intracellular part;GO:0043226//organelle;GO:0043229//intracellular organelle;GO:0043231//intracellular membrane-bounded organelle	GO:0005488//binding;GO:0001071//nucleic acid binding transcription factor activity	GO:1901576//organic substance biosynthetic process;GO:1901362//organic cyclic compound biosynthetic process;GO:0043170//macromolecule metabolic process;GO:0006807//nitrogen compound metabolic process;GO:0032774//RNA biosynthetic process;GO:0009266//response to temperature stimulus;GO:0019438//aromatic compound biosynthetic process;GO:0090304//nucleic acid metabolic process;GO:0009628//response to…
Unigene0106657	3	9	0	0.4122	0.1335	0.2938	1.0917	0.1138	0.1819	0.499766667	1.458109137	0.340715894	0.854463032	no	WRI1	PREDICTED: ethylene-responsive transcription factor WRI1-like [Juglans regia]	-	-	-	-	-	-	-
Unigene0106689	5	3	0.8776	0.1247	0	0.1866	0.2311	0.1204	0.3341	0.179366667	-0.897368177	0.584278632	0.966262161	no	BHLH94	PREDICTED: transcription factor bHLH71-like [Lupinus angustifolius]	-	-	-	-	-	GO:0036094//small molecule binding;GO:0005488//binding;GO:0043167//ion binding;GO:0043168//anion binding	-
Unigene0106877	2.666666667	9.666666667	0.3585	0.1986	0	1.3211	0.5523	0	0.1857	0.624466667	1.749650749	0.285250073	0.831875179	no	FIT	PREDICTED: transcription factor FER-LIKE IRON DEFICIENCY-INDUCED TRANSCRIPTION FACTOR-like [Sesamum indicum]	-	-	-	-	-	GO:0005488//binding;GO:0005515//protein binding	GO:0010039//response to iron ion;GO:0006810//transport;GO:0010038//response to metal ion;GO:0044765//single-organism transport;GO:0009725//response to hormone;GO:0006826//iron ion transport;GO:0006979//response to oxidative stress;GO:0006812//cation transport;GO:0051234//establishment of localization;GO:0050896//response to stimulus;GO:0030001//metal ion transport;GO:1901701//cellular response to…
Unigene0108610	10.66666667	7.333333333	0.7437	0.3924	0.5558	0.4894	0.0909	0.4739	0.563966667	0.3514	-0.682495703	0.510563973	0.938587518	no	RAP2-11	AP2 domain class transcription factor [Medicago truncatula]	-	-	-	-	-	-	-
Unigene0108910	7	24	0.503	0.2143	0.081	0.7842	1.1922	0.4832	0.2661	0.819866667	1.623420796	0.068656977	0.485501066	no	WOX3	WUSCHEL homeobox protein WOX3 [Picea abies]	-	-	-	-	-	-	-
Unigene0109514	17	1.666666667	0.5652	1.4231	0.5376	0.0473	0.1759	0	0.841966667	0.0744	-3.500388592	0.005850427	0.098773437	no	Mkrn1	zinc finger CCCH domain-containing protein 3-like [Asparagus officinalis]	-	-	-	-	-	-	-
Unigene0109781	4.666666667	3	0	0.2894	0.5903	0.231	0.1609	0.1118	0.293233333	0.1679	-0.804446881	0.683760582	0.99452762	no	--	hypothetical protein VITISV_003006 [Vitis vinifera]	-	-	-	-	-	-	-
Unigene0110857	3.333333333	0	0	0.9833	0	0	0	0	0.327766667	0.001	-8.356525332	0.266670516	0.813234758	no	EIL3	PREDICTED: ETHYLENE INSENSITIVE 3-like 3 protein isoform X2 [Lupinus angustifolius]	Environmental Information Processing	Signal transduction	ko04075//Plant hormone signal transduction	K14514	-	-	-
Unigene0111116	5	1.333333333	0.1798	1.0792	0	0.2485	0.077	0	0.419666667	0.1085	-1.951548835	0.393399549	0.881908865	no	SCR	SCL4, partial [Pinus radiata]	-	-	-	-	-	-	GO:0044699//single-organism process;GO:0044707//single-multicellular organism process;GO:0032501//multicellular organismal process
Unigene0112350	3	8.333333333	0.2322	0	0.3036	0.7486	0.0994	0.466	0.1786	0.438	1.294198789	0.393366701	0.881908865	no	GAIP	PREDICTED: scarecrow-like protein 18 [Amborella trichopoda]	-	-	-	-	-	-	-
Unigene0112540	2	5.333333333	0.4246	0	0	0.3912	0.6057	0	0.141533333	0.3323	1.231344423	0.579657268	0.964244245	no	--	hypothetical protein BRADI_1g17335 [Brachypodium distachyon]	-	-	-	-	-	-	-
Unigene0112798	17.66666667	0	0.4966	0.4315	0.6113	0	0	0	0.513133333	0.001	-9.003189936	1.18E-05	0.000567935	yes	C2H2	--	-	-	-	-	-	-	-
Unigene0113218	2	3.333333333	0.5063	0	0	0.4664	0	0.3011	0.168766667	0.255833333	0.600174266	0.812112622	1	no	SCL26	SCL16, partial [Pinus radiata]	-	-	-	-	-	-	-
Unigene0113283	4	3.666666667	0	0.3793	0.6018	0.3785	0.0703	0.3665	0.327033333	0.271766667	-0.267069178	0.937300816	1	no	--	Nuclear transcription factor Y subunit A-7 [Ananas comosus]	-	-	-	-	-	-	-
Unigene0113410	2010.666667	2137.666667	24.2289	25.5117	26.4748	24.4077	23.759	24.7859	25.40513333	24.31753333	-0.06312314	0.810040292	1	no	Os01g0834700	PREDICTED: zinc finger CCCH domain-containing protein 11 [Amborella trichopoda]	-	-	-	-	-	-	-
